# Supplementary material for: Global change impacts on bird biodiversity in South Asia: potential effects of future land-use and climate change on avian species richness in Pakistan
Source: PeerJ journal article supplement (doi:10.7717/peerj.16212), 2023-10-06

# Breeding birds temperature

GFDL-ESM2M (RCP 2.6)

HadGEM2-ES (RCP 2.6)

IPSL-CM5A-LR (RCP 2.6)

MIROC5 (RCP 2.6)

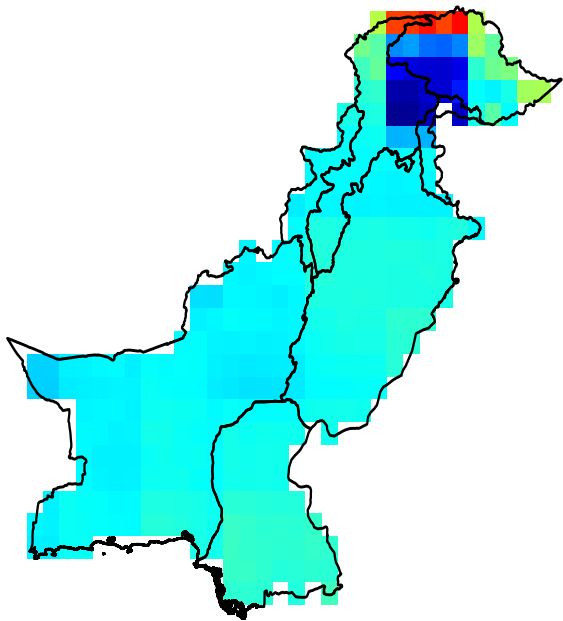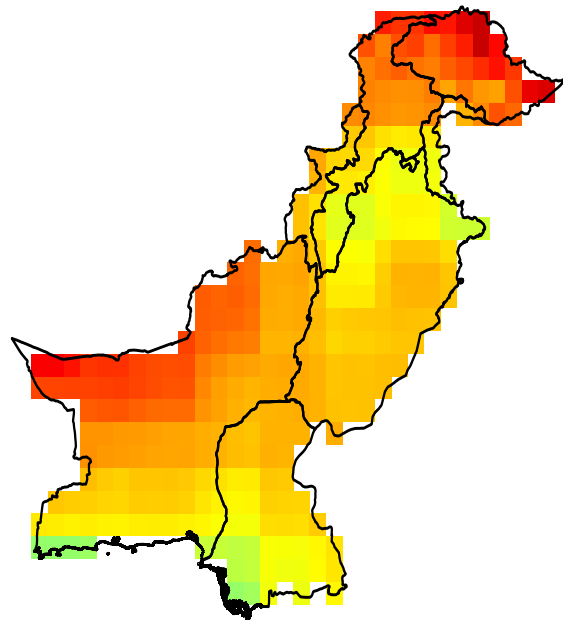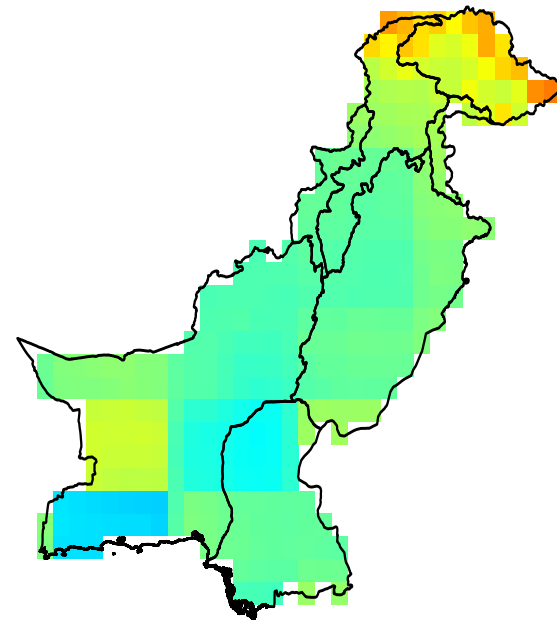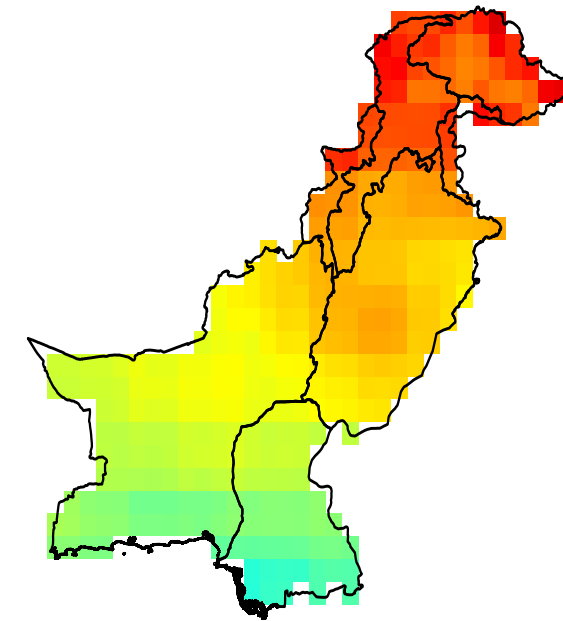

GFDL-ESM2M (RCP 6.0)

HadGEM2-ES (RCP 6.0)

IPSL-CM5A-LR (RCP 6.0)

MIROC5 (RCP 6.0)

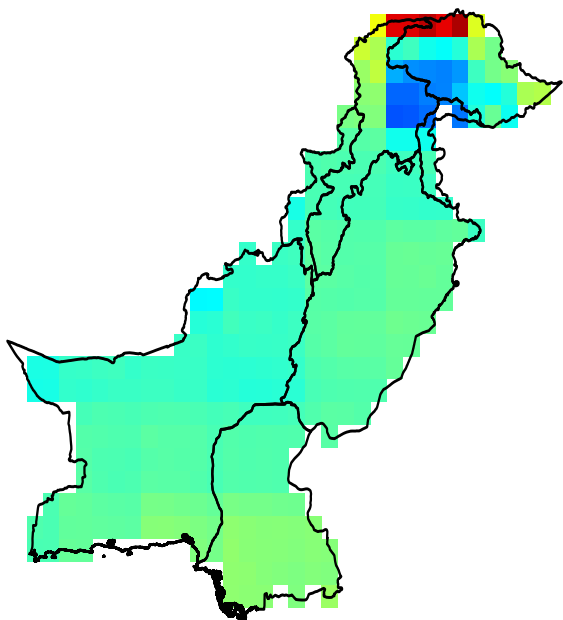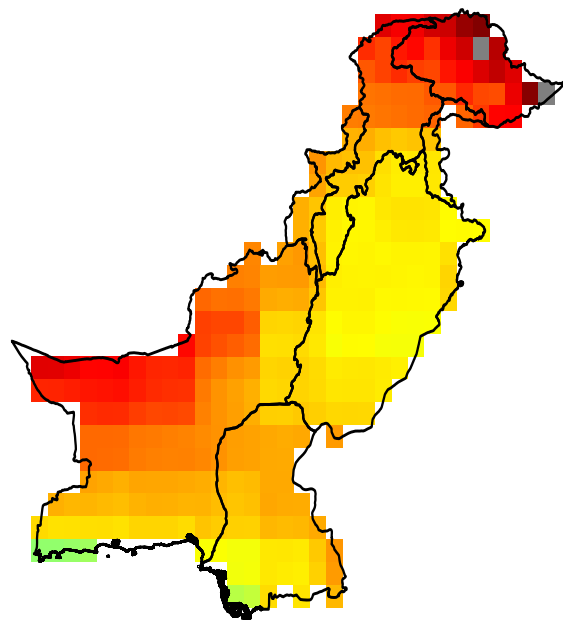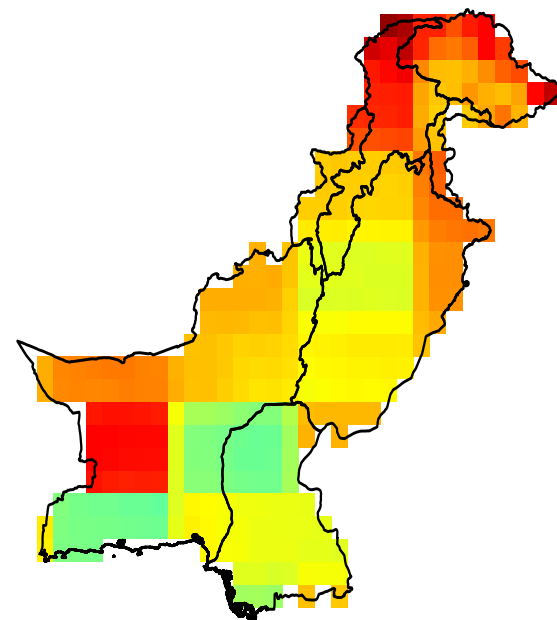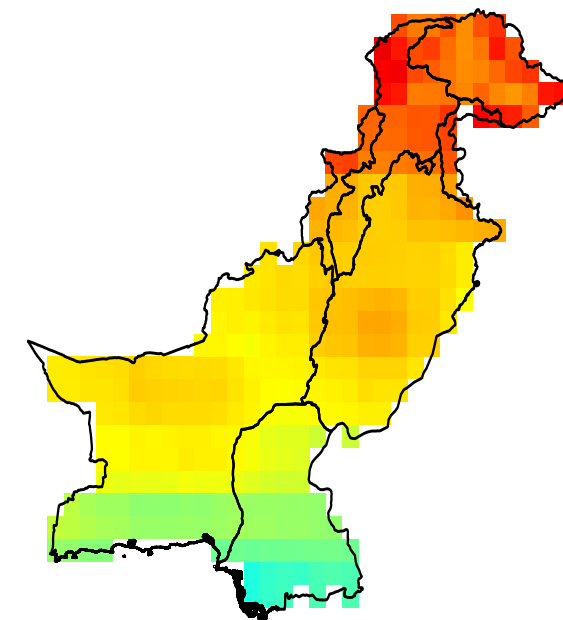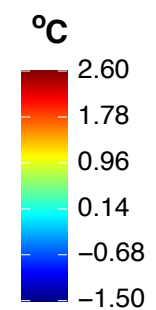

# Wintering birds temperature

GFDL-ESM2M (RCP 2.6)

HadGEM2-ES (RCP 2.6)

IPSL-CM5A-LR (RCP 2.6)

MIROC5 (RCP 2.6)

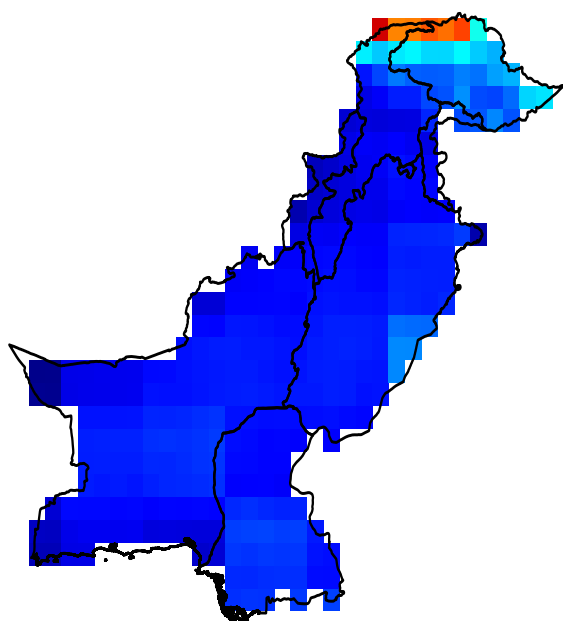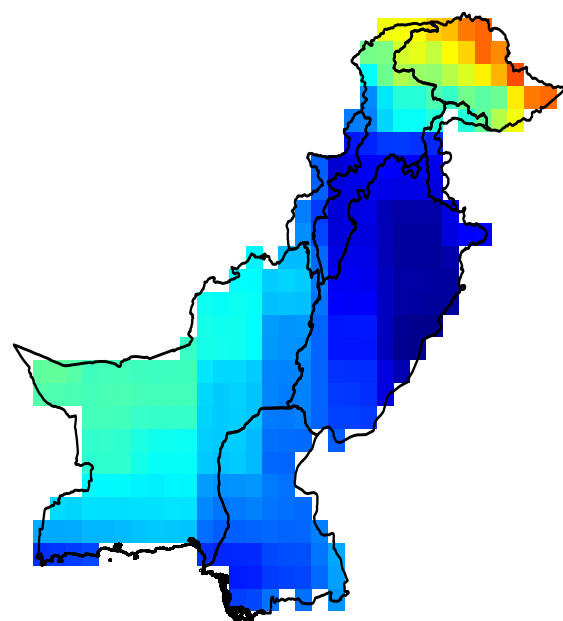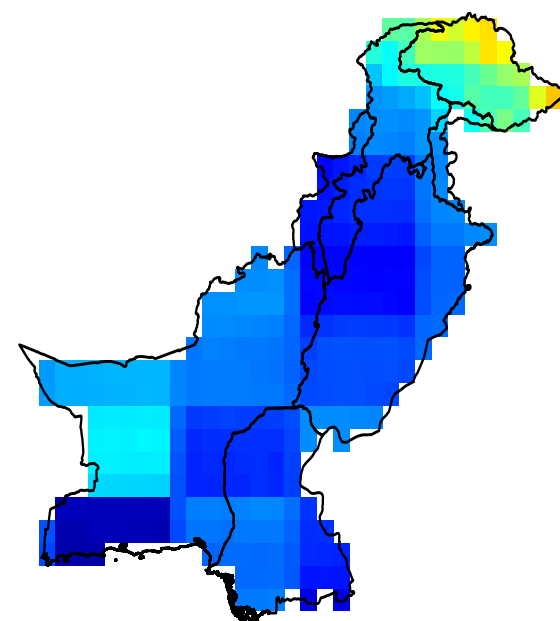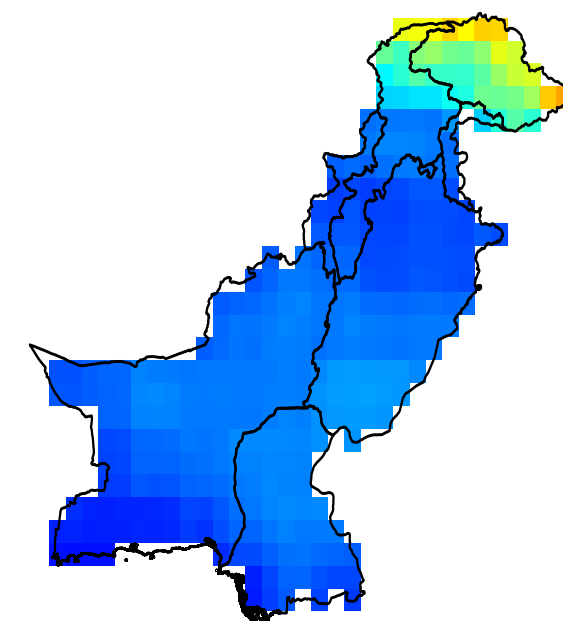

GFDL-ESM2M (RCP 6.0)

HadGEM2-ES (RCP 6.0)

IPSL-CM5A-LR (RCP 6.0)

MIROC5 (RCP 6.0)

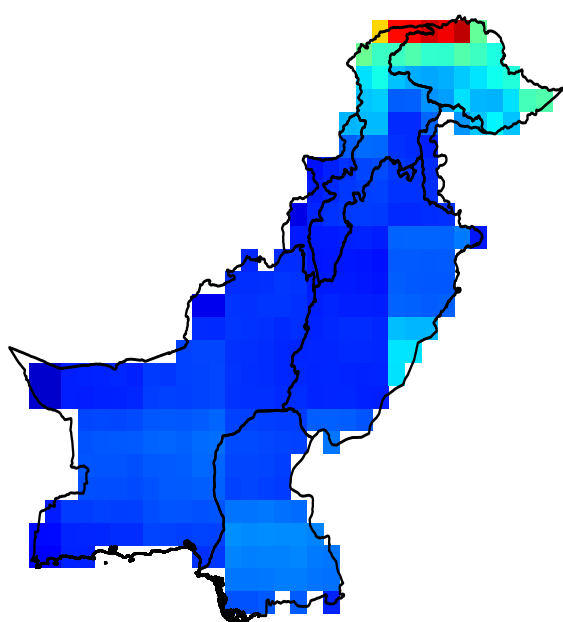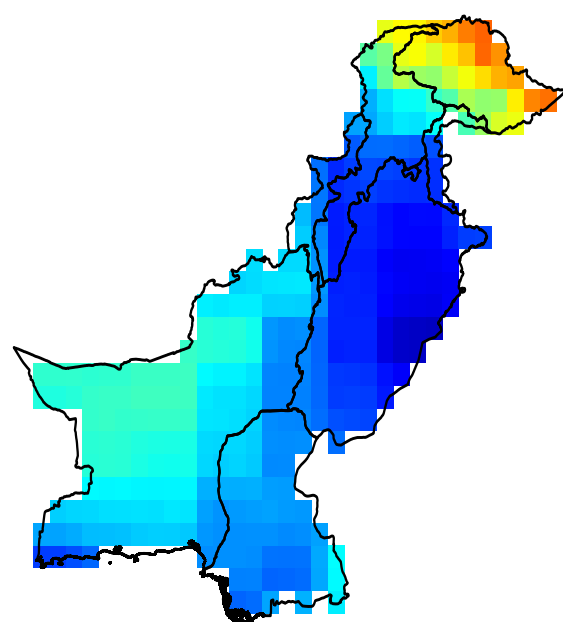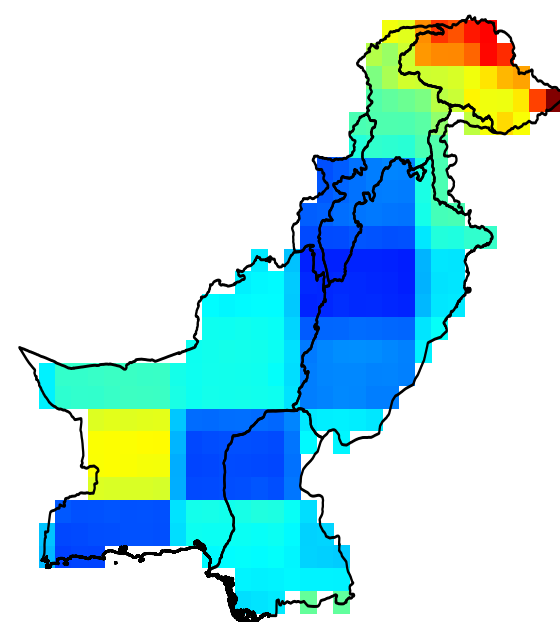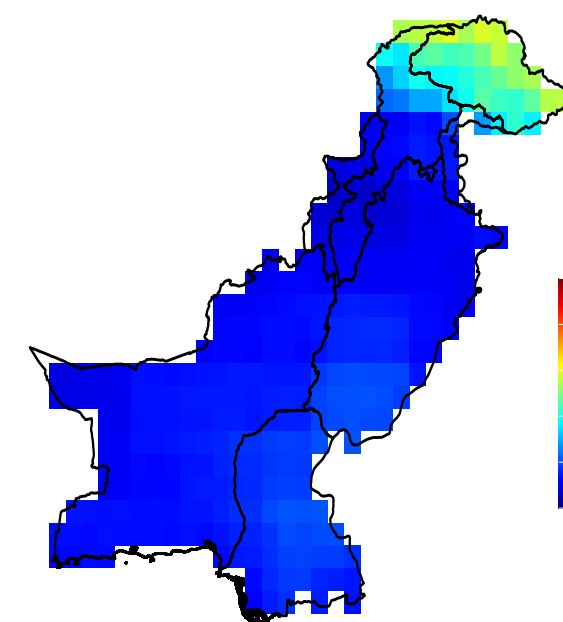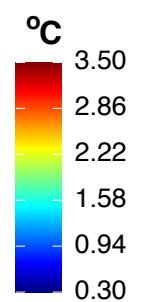

Supplement: Figure_S2.pdf [file Figure_S2.pdf]
