# Supplementary material for: Global change impacts on bird biodiversity in South Asia: potential effects of future land-use and climate change on avian species richness in Pakistan
Source: PeerJ journal article supplement (doi:10.7717/peerj.16212), 2023-10-06
Supplement: figure_s1.pdf [file figure_s1.pdf]

### Elevation

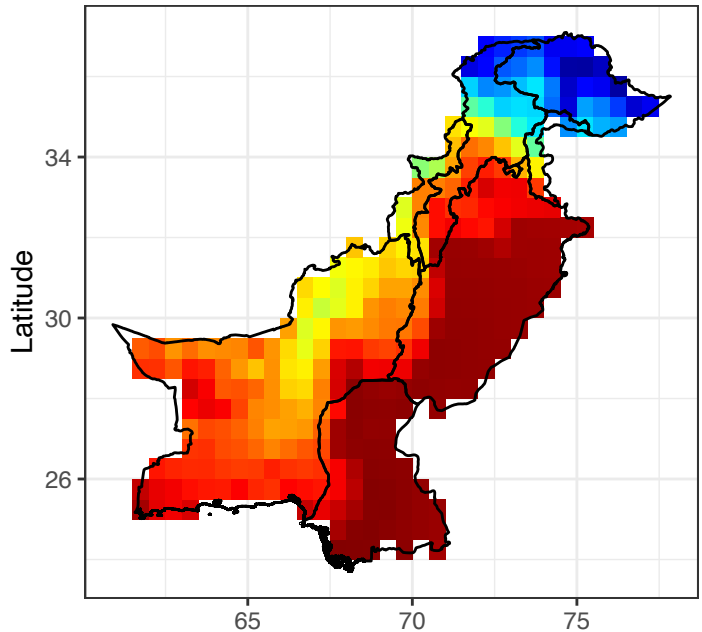

### Elevation [m]

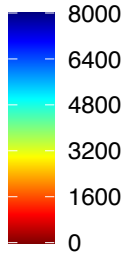

### Population

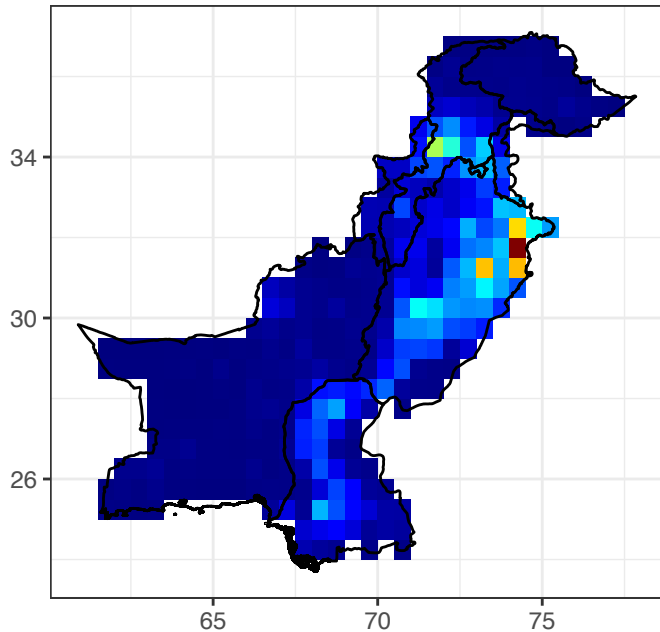

### Population

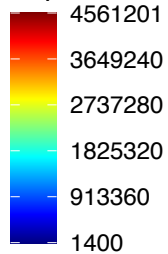

Longitude
