# Supplementary material for: Global change impacts on bird biodiversity in South Asia: potential effects of future land-use and climate change on avian species richness in Pakistan
Source: PeerJ journal article supplement (doi:10.7717/peerj.16212), 2023-10-06

# Rainfed cropland change

GFDL-ESM2M (RCP 2.6)

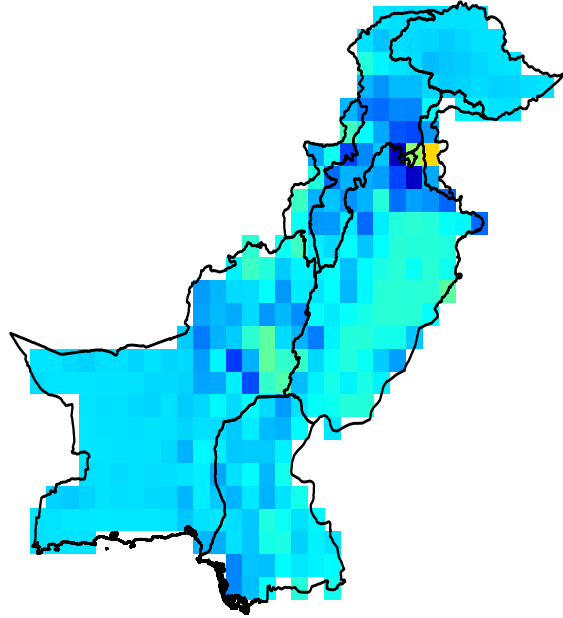

HadGEM2-ES (RCP 2.6)

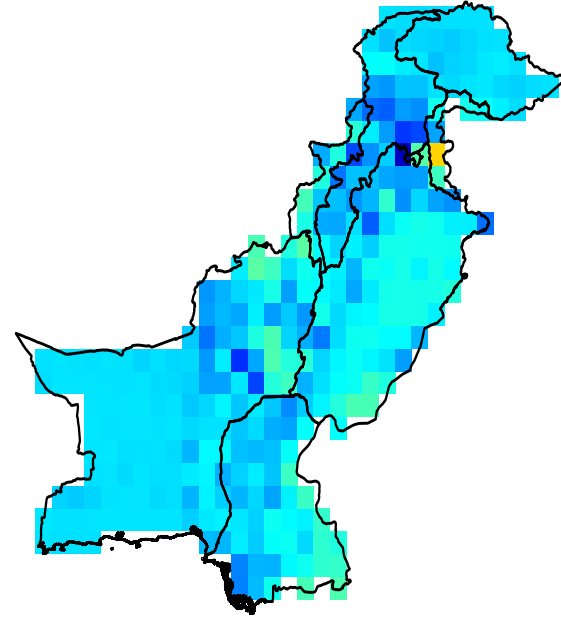

IPSL-CM5A-LR (RCP 2.6)

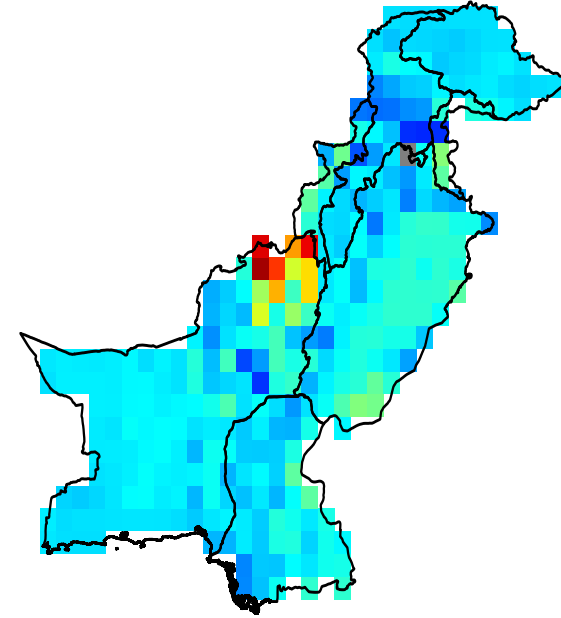

MIROC5 (RCP 2.6)

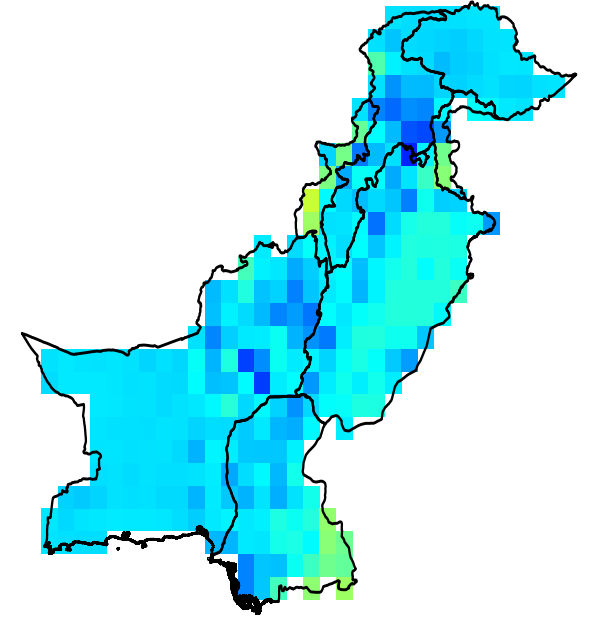

GFDL-ESM2M (RCP 6.0)

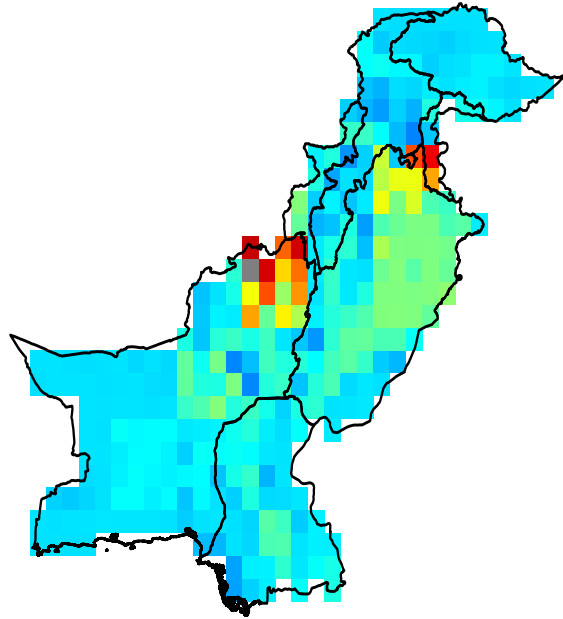

HadGEM2-ES (RCP 6.0)

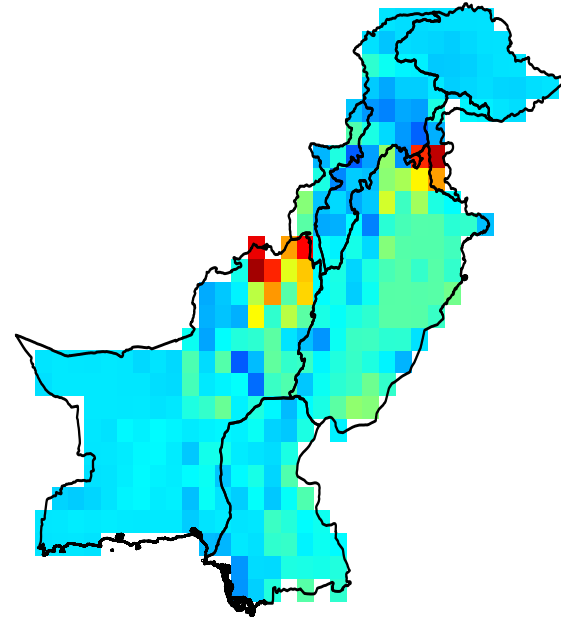

IPSL-CM5A-LR (RCP 6.0)

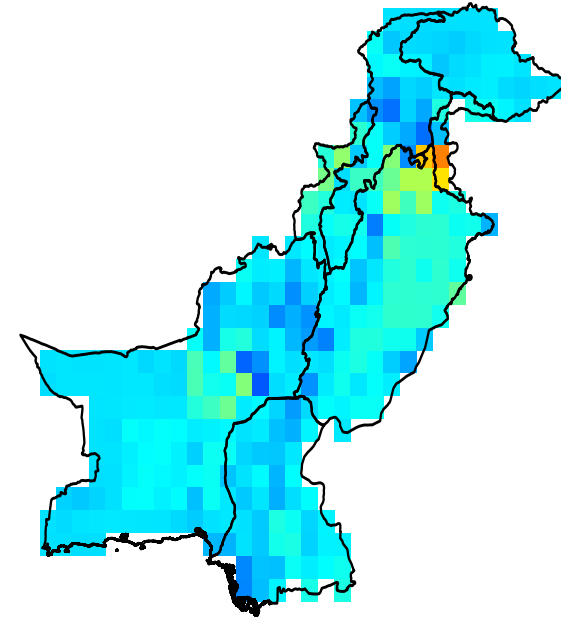

MIROC5 (RCP 6.0)

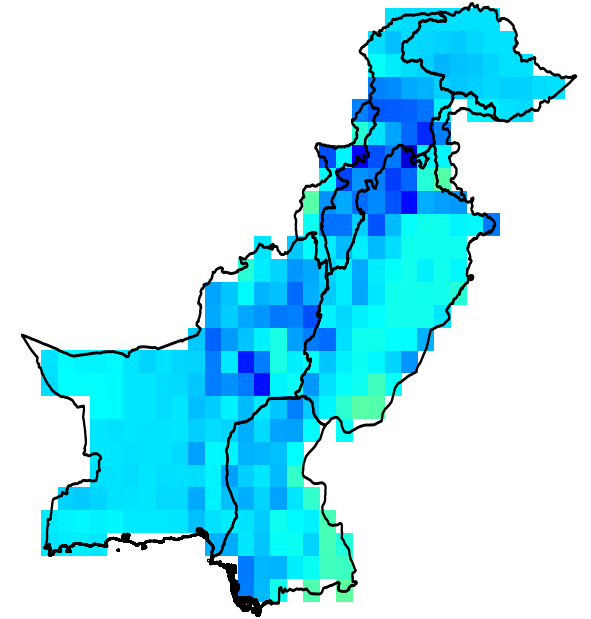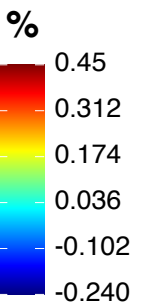

Supplement: Figure_s4.pdf [file Figure_s4.pdf]
