# Supplementary material for: Global change impacts on bird biodiversity in South Asia: potential effects of future land-use and climate change on avian species richness in Pakistan
Source: PeerJ. 2023 Oct 6;11:e16212. doi: 10.7717/peerj.16212 (PMC10561643; doi:10.7717/peerj.16212)
Supplement: Supplemental Information 6 [file peerj-11-16212-s006.xlsx]

## Sheet: breeding_birds
x	y	sum	tas	tasmin	tasmax	pr	mindis	maxdis	population	cropland_irrigated	cropland_rainfed	cropland_total	pastures	urbanareas	biofuel_cropland_irrigated	biofuel_cropland_rainfed	Barren.or.sparsely.vegetated	Closed.shrublands	Cropland.Natural.vegetation.mosaic	Croplands	Deciduous.Broadleaf.forest	Deciduous.Needleleaf.forest	Evergreen.Broadleaf.forest	Evergreen.Needleleaf.forest	Grasslands	Mixed.forest	Open.shrublands	Permanent.wetlands	Savannas	Snow.and.ice	Urban.and.built.up	Water	Woody.savannas	elevation_mn	aspect_mn	slope_mn	tri_mn	tpi_mn	roughness_mn	flowdir_mn	elevation_sd	aspect_sd	slope_sd	tri_sd	tpi_sd	roughness_sd	flowdir_sd	elevation_min	aspect_min
1	61.75	25.25	59	27.112	22.9368	31.9717	19.6129	4.57527	57.2366	37455.8	6.4588e-05	0.00280684	0.00287143	0.0036987	0	0	0	47.1796	0.0096246	0.226716	0.0852189	0.0150027	0.016127	0.0284515	0.00806413	0.0693412	0.0253168	0.0188271	0.052329	0.0263009	0.259812	0.0729002	0.171366	0.0257404	26.5013	2.7612	4.7139e-06	3.22871	0.0814331	10.5786	18.6399	29.1787	1.72095	0.000873424	3.87624	3.33576	11.5129	29.1014	-13.6169
2	61.75	25.75	63	26.8921	22.0551	32.4374	26.8065	0	0	18551.7	8.20433e-05	0.00311775	0.00319979	0.00641509	0	0	0	46.2077	0.00966395	0.219693	0.096852	0.0161924	0.0161939	0.0308249	0.00809758	0.0741359	0.0242906	0.0211605	0.0514124	0.0110739	0.248731	0.0822264	0.176577	0.0258472	145.905	2.5879	1.13582e-06	7.17069	0.0371985	22.4762	16.1093	92.335	1.78793	0.000210453	6.58072	6.04758	19.3258	27.2018	3.29017
3	61.75	28.75	57	24.5579	16.7128	31.8194	32.0645	2.02151	38.0215	8153.01	0.000869404	0.00709521	0.00796461	0.00218537	0	0	0	51.0324	NA	NA	NA	NA	NA	NA	NA	NA	NA	NA	NA	NA	NA	NA	NA	NA	817.039	2.53643	0	2.94947	0.0140703	10.2023	16.2341	74.6839	1.56479	0	3.78085	2.84809	11.7424	27.358	682.281
4	61.75	29.25	55	24.3015	16.4054	31.6087	21.1935	0	0	3159.54	0	1.94585e-05	1.94585e-05	0.00702202	0	0	0	87.6764	NA	0.0495266	0.0196645	NA	NA	NA	NA	0.00945399	NA	NA	0.039885	NA	0.0467312	0.0507215	NA	NA	856.077	2.24796	0	4.2619	0.0209613	14.5008	20.6334	208.178	1.95307	0	5.34669	3.88932	16.741	33.4608	543.726
5	62.25	25.25	53	26.7378	22.3265	31.945	21.0968	0	0	28861.8	0.000414595	0.00439185	0.00480644	0	0	0	0	80.3227	0.01613	0.217159	0.107596	0.0161262	0.0161246	0.0241889	0.00806324	0.0991005	0.0241878	0.00806494	0.0799083	0.0874765	0.253251	0.101052	0.169324	0.0276465	60.0913	2.74164	1.95676e-05	5.66448	0.219894	17.9409	16.5389	83.8811	1.58211	0.00387885	7.57702	5.34905	23.4038	26.9267	-15.5779
6	62.25	25.75	55	26.8224	21.8927	32.6163	26.5806	3.60215	52.3011	40454.6	7.13835e-05	0.0151127	0.0151841	0	0	0	0	96.9235	NA	0.0611864	0.111785	NA	NA	NA	NA	0.0944656	NA	0.00809839	0.0864953	0.0219043	0.089178	0.112745	NA	0.0315132	142.908	2.66098	4.67696e-06	6.20019	0.0335382	19.5398	16.7342	131.142	1.77975	0.000915748	7.37055	5.91447	21.8147	27.5164	1.4812
7	62.25	26.25	57	25.6949	19.8343	31.9492	37.2258	1.92473	33.2581	65107.6	0.00534407	0.0124124	0.0177564	0.0752595	0.00127541	0	0	71.6695	NA	0.138921	0.0459997	NA	NA	NA	NA	0.0639521	NA	NA	0.0542794	0.00809458	0.176655	0.179448	NA	NA	413.852	2.67993	0	9.88357	0.0291611	30.9803	15.0449	193.495	1.7075	0	9.86525	8.19411	29.6255	24.9237	99.864
8	62.25	28.75	52	26.2405	18.3953	33.4453	14.3548	3.45699	61.7849	4639.15	0	0.000649303	0.000649303	0.0157293	0	0	0	87.365	NA	0.159478	0.0241016	NA	NA	NA	NA	0.0482054	NA	NA	0.080341	NA	0.125367	0.0803445	NA	NA	750.74	2.42658	0	2.2947	0.0128315	8.20958	15.5694	104.766	1.52121	0	3.14386	2.28337	9.72082	27.2163	595.868
9	62.25	29.25	52	24.5527	16.6159	31.8879	11.9032	0	0	2395.54	0	1.52638e-12	1.52638e-12	0.0556232	0	0	0	77.92	NA	0.0597901	0.0180578	NA	NA	NA	NA	0.0177354	NA	NA	0.0254731	NA	0.07636	0.0690764	NA	NA	908.806	2.70963	1.51411e-06	3.90817	0.0185136	13.2964	20.8094	129.362	1.97598	0.000495015	4.81845	3.45578	15.0086	31.0241	626.56
10	62.75	25.25	51	26.78	22.1845	32.2865	25.7742	0	0	13751.4	0	0.00775622	0.00775622	0	0	0	0	67.7745	NA	0.105287	0.0146195	NA	NA	NA	NA	0.035792	NA	0.00805708	0.00805788	0.0408595	0.0950819	0.0175733	NA	0.00805673	78.491	2.64832	3.22238e-06	6.21312	0.0184677	19.8473	17.293	110.739	1.77165	0.00160475	8.79934	5.91906	27.2746	28.3859	-11.6025
11	62.75	25.75	52	26.7766	21.7038	32.7784	32.9032	3.36022	49.5108	19940.5	3.58747e-06	0.00546244	0.00546603	0.000209693	0	0	0	94.2181	NA	0.105594	0.0455356	NA	NA	NA	NA	0.0251067	NA	0.0227552	0.0412498	0.0210987	0.199942	0.187445	NA	0.0426499	126.411	2.69043	6.25679e-07	5.60973	0.0317512	17.8179	17.2975	98.3916	1.78695	0.000311589	7.2375	5.5005	21.5351	28.0302	20.8229
12	62.75	26.25	52	26.161	20.266	32.5286	39.5161	3.07527	46.3011	62436	0.00796451	0.0179218	0.0258863	0.00853397	0	0	0	99.0173	NA	0.171167	0.124883	NA	NA	NA	NA	0.179956	NA	0.0551987	0.112277	0.0132924	0.153077	0.19228	NA	0.0378329	593.191	2.65707	0	10.6293	0.0499359	33.0529	15.6149	200.758	1.80167	0	9.16564	8.28733	27.3583	25.8227	110.082
13	62.75	28.75	48	26.8894	19.0461	34.068	10.3226	0	0	5650.36	0	0.000145366	0.000145366	0.00045594	0	0	0	95.7341	NA	0.0160715	NA	NA	NA	NA	NA	NA	NA	NA	NA	NA	0.00803558	NA	NA	NA	730.229	2.53639	0	2.15096	0.00215113	7.64864	13.7175	161.889	1.3126	0	3.34893	2.43674	10.1957	24.1108	518.054
14	62.75	29.25	49	23.0823	15.0647	30.4834	9.80645	0	0	1516.11	0	0.016381	0.016381	0.109526	0	0	0	69.5863	NA	0.138348	NA	NA	NA	NA	NA	NA	NA	NA	NA	NA	0.164806	0.23825	NA	NA	1114.8	2.70818	6.02504e-06	6.35689	0.0182287	20.9439	17.3305	202.01	1.83057	0.00196979	7.14603	5.27035	22.3632	27.8391	744.329
15	63.25	25.25	52	26.7515	21.9621	32.5161	23.1935	0.188172	4.41398	26045.3	0.000156377	0.00613499	0.00629136	0	0.000433323	0	0	66.8549	0.00805876	0.0739462	0.0123909	NA	NA	NA	NA	0.0161152	NA	0.00805908	0.0123903	0.00805858	0.101618	0.0299503	NA	0.012397	68.9703	2.70879	0	6.31796	0.0340393	19.9919	17.5639	83.709	1.80095	0	7.74052	5.89859	23.647	28.2002	-15.0042
16	63.25	25.75	52	26.2209	20.9646	32.473	28.9032	0.0537634	2	58082.9	4.77577e-05	0.00188004	0.0019278	0	0.0010406	0	0	93.3454	0.00809219	0.172106	0.0778313	NA	NA	NA	NA	0.0637092	NA	0.0734717	0.0372498	0.040762	0.286568	0.563707	NA	0.0905755	223.859	2.82062	0	6.04396	0.0302476	19.2265	15.718	126.232	1.71005	0	6.50552	5.52116	19.2342	24.9611	48.1779
17	63.25	26.25	47	25.1806	19.1872	31.7531	35.3548	0.193548	5.68817	95536.5	0.00381052	0.0100018	0.0138123	0.00734546	0.0021157	0	0	99.7471	NA	0.114765	0.0578623	NA	NA	NA	NA	0.0740993	NA	0.0367844	0.0933451	0.0313592	0.173066	0.178813	NA	0.0526636	627.501	2.6626	0	9.90581	0.0547451	30.5846	15.6351	182.869	1.81582	0	8.35795	7.87482	24.5751	25.8651	213.667
18	63.25	26.75	47	24.266	17.4986	31.1592	25.1613	0	0	37150.5	0.000119699	0.00648987	0.00660957	0.012278	0	0	0	62.9058	NA	0.028974	0.0225869	NA	NA	NA	NA	0.0743763	NA	NA	0.104502	NA	0.14124	0.0736052	NA	NA	900.876	2.56921	0	5.7376	0.037729	18.0989	18.0913	101.461	1.88085	0	6.02154	5.26329	17.39	30.0517	697.705
19	63.25	27.25	49	23.7602	16.4281	30.7876	20.1935	2.92473	58.6344	11355.8	0	0.000754464	0.000754464	0.0429555	0	0	0	78.9106	NA	0.0396251	0.0737612	NA	NA	NA	NA	0.0241763	NA	NA	0.0917107	NA	0.156133	0.0373731	NA	NA	988.37	2.46045	0	6.79377	0.026817	22.1019	21.7833	217.334	2.07724	0	8.66702	6.2206	26.7169	34.0233	670.993
20	63.25	27.75	40	26.7144	19.1	33.8465	18.2903	0	0	8935.83	0	0.000669454	0.000669454	0.0104774	0	0	0	97.6152	NA	0.0456411	0.0869429	NA	NA	NA	NA	NA	NA	NA	0.0921261	NA	0.15684	0.0375424	NA	NA	649.354	2.44898	0	2.72897	0.00541626	9.23704	24.9715	99.4472	2.07985	0	2.89149	2.68457	8.13358	36.4872	513.706
21	63.25	28.25	41	27.2328	19.4111	34.4524	14.2581	19.5645	281.935	6304.83	0	0.00179614	0.00179614	0.00160941	0	0	0	100.544	NA	NA	NA	NA	NA	NA	NA	NA	NA	NA	NA	NA	NA	NA	NA	NA	530.104	2.65246	0	1.84105	0.000138538	6.26819	20.9193	30.8841	1.79912	0	1.61181	2.03647	3.86357	32.016	482.332
22	63.25	28.75	44	26.4395	18.396	33.7951	12.2903	0.0537634	1.78495	4126.92	0	0.000626531	0.000626531	0.0021837	0	0	0	100.535	NA	NA	NA	NA	NA	NA	NA	NA	NA	NA	NA	NA	NA	NA	NA	NA	691.9	2.72561	0	1.74067	0.000942531	6.17496	14.8356	105.298	1.37571	0	1.68631	1.78839	4.70191	24.4408	512.841
23	63.25	29.25	47	22.15	13.998	29.6549	12.3871	0	0	2477.19	0	0.0273132	0.0273132	0.0909224	0	0	0	74.1811	NA	0.481711	0.307121	NA	NA	NA	NA	0.735672	NA	NA	0.213936	0.0181671	0.578512	0.989364	NA	NA	1065.43	2.65084	1.22746e-06	6.65084	0.0196224	21.5116	14.7197	150.871	1.60611	0.0004457	6.54153	5.41304	20.3833	24.7954	798.772
24	63.75	25.75	56	25.4587	20.1435	31.8018	24.3226	0	0	16456.3	0	0.000516742	0.000516742	0	0	0	0	91.5327	0.0123336	0.0776039	0.0591712	NA	NA	NA	NA	0.010248	NA	NA	0.0297196	0.0113529	0.071921	0.0444988	0.136883	0.0214148	379.613	2.83284	0	9.43479	0.0402184	29.4742	14.9647	183.136	1.7422	0	8.8045	7.61743	26.4029	24.0539	46.397
25	63.75	26.25	52	24.6564	18.5754	31.3272	28.7097	0.0752688	2.74194	20824.3	0.000145931	0.00100882	0.00115475	0.00545566	0	0	0	100.235	NA	0.0456205	0.055005	NA	NA	NA	NA	0.0150407	NA	NA	0.0631629	0.00856536	0.101254	0.0424668	NA	0.0094807	693.302	2.75427	0	10.5669	0.0593523	32.672	15.4039	168.632	1.82751	0	8.60981	8.29277	25.3226	25.2978	305.135
26	63.75	26.75	49	24.754	17.9742	31.6793	20.3548	0.989247	17.9892	35627.5	0.000115495	0.00211413	0.00222963	0.000725334	0	0	0	100.362	NA	0.0532696	0.0807115	NA	NA	NA	NA	0.0142137	NA	NA	0.0610698	0.021494	0.122428	0.0588338	NA	0.0340378	887.941	2.75941	0	4.80352	0.0299247	15.331	18.2884	82.0815	1.82826	0	5.03095	4.48768	14.5029	28.7773	735.114
27	63.75	27.25	47	24.4123	17.0529	31.5831	19.1613	5.24731	83.8387	14908	0	6.71737e-06	6.71737e-06	0.0176145	0	0	0	100.365	NA	0.0477394	0.0727267	NA	NA	NA	NA	NA	NA	NA	0.032206	NA	0.103673	0.0481544	NA	NA	894.067	2.7654	0	6.28566	0.0243979	20.3867	19.3465	162.455	1.95495	0	7.74499	5.91671	23.5148	29.6736	642.818
28	63.75	27.75	43	26.7655	19.1257	34.0179	18.9677	5.99462	92.6559	5758.11	0.000512832	0.00524524	0.00575807	0.00833639	0	0	0	100.511	NA	NA	NA	NA	NA	NA	NA	NA	NA	NA	NA	NA	NA	NA	NA	NA	630.077	2.68989	0	3.35532	0.00525719	10.9338	21.0705	54.5623	1.94386	0	3.18678	3.33537	8.6916	32.1065	530.047
29	63.75	28.25	44	26.7122	18.7317	34.049	20.129	4.55914	82.9032	2802.13	0	0.00962045	0.00962045	0.00499905	0	0	0	100.492	NA	NA	NA	NA	NA	NA	NA	NA	NA	NA	NA	NA	NA	NA	NA	NA	600.686	2.77856	0	3.64978	0.00469801	11.8221	18.4373	76.5882	1.74977	0	3.55295	3.52399	10.1846	28.7653	509.722
30	63.75	28.75	43	25.3275	17.0897	32.8006	20.4839	0.354839	9.31183	11176.4	0	0.00749177	0.00749177	0.012385	0	0	0	100.494	NA	0.0326181	NA	NA	NA	NA	NA	NA	NA	NA	NA	NA	0.0439158	0.0207578	NA	NA	794.811	2.80581	0	2.9407	0.00939156	9.95831	14.2389	118.866	1.43283	0	3.39117	2.91652	10.1145	22.8618	588.012
31	63.75	29.25	49	20.8135	12.5009	28.3569	19.3548	0	0	4913.84	0	0.00875728	0.00875728	0.0872931	0	0	0	73.5516	NA	0.981199	0.560125	NA	NA	NA	NA	1.67214	NA	0.014698	0.504377	0.0826848	0.98158	1.92972	NA	0.0122674	1281.57	2.67163	4.88436e-06	12.0255	0.0496343	38.5974	12.924	204.747	1.63953	0.00177355	9.41033	8.11151	29.7515	21.3668	885.876
32	64.25	25.75	61	25.1388	19.832	31.4261	19.1613	0	0	9812.18	0	0	0	0	0	0	0	92.0017	0.0309574	0.0817779	0.174847	0.122044	0.0295726	0.0189278	0.00808025	0.0391963	0.0591562	NA	0.076685	0.0403135	0.109744	0.13998	0.553163	0.0660246	441.721	2.75336	0	10.4418	0.0474779	32.2842	16.0551	177.759	1.82898	0	9.56962	8.28437	28.5225	26.5837	40.4975
33	64.25	26.25	58	25.266	19.2041	31.8592	21.2903	0	0	28183.6	0.000127894	0.0374939	0.0376218	0.0103534	0	0	0	100.15	NA	0.072372	0.0537656	NA	NA	NA	NA	0.0507462	NA	NA	0.0924832	0.0117917	0.0714328	0.0793089	NA	0.0161284	757.048	2.83584	0	9.35373	0.0570898	29.1854	14.9252	167.292	1.76164	0	8.55193	7.61907	25.2619	24.5959	438.722
34	64.25	26.75	52	23.7016	16.8725	30.6191	20.9032	0.344086	9.33333	81453.4	0.00424793	0.00718672	0.0114347	0.026984	0.00189084	0	0	99.8778	0.00803947	0.101245	0.165812	NA	NA	NA	NA	0.0399321	NA	0.0241208	0.0405429	0.0259329	0.109095	0.125146	NA	0.0367448	1033.92	2.98655	0	6.12345	0.0377426	19.5703	16.5168	123.27	1.76236	0	6.60748	5.53475	19.552	25.0892	797.053
35	64.25	27.25	51	23.4996	16.1656	30.6687	19.871	0	0	13069.1	0.00105905	0.00290982	0.00396887	0.0201159	0	0	0	100.406	NA	0.102627	0.189246	NA	NA	NA	NA	0.0362601	NA	NA	0.0295609	0.0295594	0.119807	0.138789	NA	0.0415843	1044.36	2.92077	0	7.43605	0.0352438	23.6651	18.9449	196.929	1.96122	0	7.65897	6.51762	22.9212	28.155	670.601
36	64.25	27.75	47	26.369	18.7064	33.6324	21.0645	0	0	2488.62	0	0.0291213	0.0291213	0.0179663	0	0	0	100.531	NA	0.021491	NA	NA	NA	NA	NA	NA	NA	NA	NA	NA	0.0314071	0.0233515	NA	NA	681.471	2.77982	0	3.73343	0.00684342	12.0251	20.5014	66.7845	1.92642	0	3.37076	3.54473	9.38181	31.0975	561.124
37	64.25	28.25	51	25.3189	17.1899	32.7442	24.7742	4.10215	76.7097	2571.11	0	0.0170306	0.0170306	0.00436366	0	0	0	100.28	NA	0.0655175	0.0360941	NA	NA	NA	NA	0.0160778	NA	NA	0.0160797	NA	0.120901	0.0683294	NA	NA	734.378	2.75242	5.21479e-05	7.34637	0.0169477	23.6112	16.6796	210.179	1.73156	0.00290462	9.20918	6.52005	28.9081	26.7804	542.922
38	64.25	28.75	46	22.8319	14.4193	30.3314	25.6129	0	0	25540.5	0	0.00737246	0.00737246	0.0382962	0.00055645	0	0	100.142	NA	0.176202	0.0948385	NA	NA	NA	NA	0.0394507	NA	NA	0.0339681	NA	0.194269	0.11796	NA	NA	903.99	2.72997	1.30147e-05	5.77528	0.0210625	18.9204	15.8178	153.655	1.69388	0.000969603	7.79571	5.31579	24.3664	25.8955	683.139
39	64.25	29.25	54	21.0157	12.5698	28.5682	24.4839	0	0	11614.1	0	0.0143929	0.0143929	0.0723774	0	0	0	70.9656	NA	1.24645	1.01629	NA	NA	NA	NA	4.02127	NA	0.0162569	0.88961	0.173036	1.29325	2.74669	NA	0.0390095	1225.72	2.47264	1.0832e-07	10.6662	0.04619	34.4415	13.4456	195.735	1.65771	6.49919e-05	9.92986	7.61159	31.39	23.8688	916.905
40	64.75	25.75	69	25.1799	19.929	31.3447	18.0323	0	0	4871.13	0	0.000265162	0.000265162	0	0	0	0	93.2034	NA	0.179499	0.109428	NA	NA	NA	NA	0.111471	NA	0.0846538	0.057947	0.113706	0.198603	0.10373	0.149915	0.0635197	365.573	2.7066	1.31588e-05	9.73391	0.054138	30.4328	15.183	144.77	1.7935	0.00107278	9.37582	7.79636	28.2093	25.7905	52.9447
41	64.75	26.25	66	24.2102	18.1798	30.673	18.9355	0	3.23656	19082.8	0	0.0233844	0.0233844	0.00842861	0	0	0	100.14	NA	0.0759377	0.0724396	NA	NA	NA	NA	0.0604841	NA	NA	0.0688476	NA	0.0877492	0.104121	NA	0.00806849	730.902	2.79524	2.1664e-07	9.72229	0.0458996	30.7906	14.5674	212.438	1.73547	9.19123e-05	9.35987	7.77637	28.4281	25.1332	392.604
42	64.75	26.75	58	23.2626	16.5587	29.9738	20.9355	0	0	20856.3	0	0.0205373	0.0205373	0.0214374	0	0	0	100.269	NA	0.0437396	0.0458374	NA	NA	NA	NA	0.0285319	NA	NA	0.0418168	0.017457	0.0368914	0.0404069	NA	0.015759	1111.01	2.83849	0	7.40378	0.0419804	23.8846	16.1407	138.753	1.80285	0	7.24759	6.12145	22.0377	26.4623	745.799
43	64.75	27.25	56	22.4459	15.2482	29.4232	21	0.112903	4.89247	13514.4	5.88613e-05	0.00747947	0.00753833	0.0223781	0	0	0	100.416	NA	0.0165723	0.0137145	NA	NA	NA	NA	0.0215407	NA	NA	0.0362766	0.0175344	0.0389816	0.0400503	NA	0.0174688	1255.8	2.89222	0	7.78178	0.0371888	24.9214	16.2912	169.792	1.81322	0	8.41954	6.71849	25.7302	25.591	766.462
44	64.75	27.75	55	24.9174	17.254	32.0942	22.1613	0	0	7030.05	0.000171317	0.0273347	0.0275061	0.043551	0	0	0	100.475	NA	0.0286869	0.00807486	NA	NA	NA	NA	NA	NA	NA	NA	NA	0.0305965	0.0319007	NA	NA	825.071	2.88345	0	5.93383	0.0105041	18.8171	19.1476	141.059	1.89776	0	6.20578	5.41318	18.7957	28.8459	603.624
45	64.75	28.25	56	25.7456	17.6326	33.0599	25.7419	3.33333	65.4247	6677.88	0	0.0431587	0.0431587	0.000621951	0	0	0	100.428	NA	0.0361695	0.0147407	NA	NA	NA	NA	NA	NA	NA	NA	NA	0.0473351	0.0265342	NA	NA	728.267	2.75459	0.000210207	6.80766	0.015711	21.7962	17.0226	167.681	1.73629	0.0122189	10.0305	6.4215	31.4403	27.4458	576.233
46	64.75	28.75	57	22.2802	13.8454	29.6315	27.4839	0	0	6366.17	0	0.0140375	0.0140375	0.0221946	0	0	0	98.027	NA	0.772412	0.411504	NA	NA	NA	NA	0.234336	NA	NA	0.167454	0.02138	0.536967	0.440326	NA	NA	952.402	2.70668	6.5925e-05	8.59847	0.0285111	27.7921	17.4311	214.786	1.82569	0.0054948	11.6786	7.21035	36.8198	28.0262	741.59
47	64.75	29.25	59	23.9125	15.2849	31.4497	26.9032	13.0753	218.532	15692.3	0.00563528	0.0124334	0.0180686	0.00763446	0	0	0	90.7412	NA	1.11986	0.894297	NA	NA	NA	NA	1.62193	NA	0.0509889	0.729301	0.175628	1.01171	1.80848	NA	0.0657371	977.01	2.41465	3.68063e-06	6.32991	0.0218871	20.6969	17.2548	186.448	1.70275	0.00061458	9.19839	5.84315	28.9093	30.1195	809.65
48	65.25	25.75	78	25.8221	20.7008	31.8948	21.2581	3.54301	49.4355	4923.52	0	0.00109703	0.00109703	0.0133489	0	0	0	90.2897	NA	0.209772	0.0702111	NA	NA	NA	NA	0.067298	NA	0.106901	0.093189	0.195438	0.308718	0.0823313	NA	0.103542	280.113	2.66454	0.000183041	11.4291	0.0453625	36.3534	14.688	160.864	1.77533	0.00937831	11.7771	8.85891	36.7272	25.2773	42.441
49	65.25	26.25	73	26.2014	20.3163	32.5541	24.5161	3.01075	45.5215	17605.5	0.00333963	0.0118184	0.015158	0.00134907	0	0	0	99.6733	NA	0.0860195	0.055143	NA	NA	NA	NA	0.0782009	NA	0.129534	0.0807809	0.166273	0.19921	0.107088	NA	0.0801758	527.521	2.74158	2.78337e-05	9.10695	0.0481044	29.4311	14.5539	167.201	1.72453	0.00139094	9.25021	7.32677	28.7577	25.6328	213.095
50	65.25	26.75	67	24.3087	17.671	30.797	26.0645	0.650538	11.871	20356.3	0.000276074	0.0107105	0.0109866	0.027565	0	0	0	97.0391	NA	0.281257	0.296164	NA	NA	NA	NA	0.660417	NA	0.839814	0.25132	0.233008	0.383696	0.280545	NA	0.290148	973.762	2.8333	0	9.99662	0.0436113	32.5251	14.3936	198.037	1.72735	0	8.92546	7.43411	28.0911	24.5071	500.481
51	65.25	27.25	61	21.7041	14.6296	28.3828	27.2581	0.139785	4.51613	22134.5	0.000223321	0.0116833	0.0119066	0.0529323	0	0	0	96.6928	NA	0.25957	0.257204	NA	NA	NA	NA	0.525809	NA	0.925566	0.329782	0.248273	0.709678	0.29999	NA	0.52939	1337.69	2.88381	0	7.82343	0.0334586	25.556	14.2365	173.531	1.68362	0	8.05957	6.29582	25.2473	23.0717	886.034
52	65.25	27.75	56	22.167	14.7649	29.1116	34.4839	0	0	7186.33	0	0.00319818	0.00319818	0.0380725	0	0	0	99.589	NA	0.11269	0.0733452	NA	NA	NA	NA	1.28025	NA	2.67515	0.699062	0.747767	0.218036	0.130231	NA	1.5093	1135.28	2.95952	0	8.65359	0.0249959	27.8891	16.7448	257.779	1.8037	0	8.21737	6.94544	25.4369	25.3578	706.996
53	65.25	28.25	64	25.7941	17.8337	32.9741	33.7097	2.44086	53.6667	17730.8	0.000700481	0.0388035	0.039504	0.0206425	0	0	0	100.144	NA	0.108484	0.0399906	NA	NA	NA	NA	0.100746	NA	0.228957	0.0926876	0.110272	0.103736	0.12968	NA	0.0632089	827.847	2.85852	1.07333e-05	5.76779	0.0130354	18.5502	18.0253	161.403	1.77113	0.00262908	7.22058	5.14976	22.5026	27.495	636.323
54	65.25	28.75	59	21.0854	12.8359	28.3024	31.4516	0	0	59924	0.00158802	0.0211541	0.0227422	0.0283036	0.00120919	0	0	96.3319	NA	1.07196	0.571013	NA	NA	NA	NA	0.550797	NA	0.0215695	0.346827	0.0769024	0.755562	0.987063	NA	0.0296257	1016.29	2.79981	5.62525e-05	10.8993	0.0237831	35.1648	15.7259	282.657	1.74203	0.00651209	12.5702	8.30236	40.0458	25.1246	678.22
55	65.25	29.25	70	23.8032	15.275	31.2486	32.8387	11.0914	187.608	4431.48	0.00057969	0.0037103	0.00428999	0.00179647	0	0	0	96.6643	NA	1.27402	0.688349	NA	NA	NA	NA	NA	NA	NA	0.340637	NA	0.897291	1.18286	NA	NA	912.278	2.7212	1.33805e-05	4.72743	0.00844994	15.3067	18.5095	94.7126	1.78095	0.00168619	5.21242	4.13891	15.8801	29.1458	773.412
56	65.75	25.75	90	25.3654	20.28	31.388	25.6774	3.8172	51.7796	6269.17	0	0.00902438	0.00902438	0.0619447	0	0	0	85.3303	NA	0.347448	0.233214	0.0777586	0.0769186	NA	0.060447	0.347976	0.0261857	0.701967	0.276133	0.39877	1.09933	0.282408	0.950945	0.609518	264.651	2.69305	0.000525397	13.5845	0.0256913	43.4168	15.0262	218.743	1.77548	0.0212662	14.2744	10.1802	45.2311	25.1008	1.35642
57	65.75	26.25	85	26.0485	20.1751	32.3563	31.7742	1.41398	26.0968	18569	0.00470779	0.0295622	0.03427	0.0667187	0	0	0	93.8595	NA	0.446842	0.344745	NA	NA	NA	NA	0.444907	NA	2.24547	0.413645	0.468419	1.03565	0.529255	NA	0.744747	416.576	2.7552	0.000109526	9.52878	0.0318263	30.7771	14.7636	171.93	1.71616	0.00468613	9.97283	7.54094	31.4796	24.6847	136.605
58	65.75	26.75	76	25.1514	18.5251	31.5303	36.4194	1.10215	22.8118	15933.5	0.00146567	0.0104644	0.0119301	0.0384236	0	0	0	75.0687	0.00803472	1.50391	1.22288	NA	NA	NA	NA	3.92399	NA	11.4485	1.0425	1.46016	1.88251	1.22216	NA	1.76266	892.094	2.82129	2.1664e-07	11.623	0.0361161	37.7033	12.9155	261.454	1.67102	9.19123e-05	9.95874	8.12591	31.5448	21.1	410.389
59	65.75	27.25	69	22.4111	15.434	28.8631	42.3548	0.919355	19.5161	18675.8	0.00407439	0.0216037	0.0256781	0.0707675	0	0	0	71.02	NA	1.54013	1.56373	NA	NA	NA	NA	3.08459	NA	10.9872	1.48354	1.60568	4.27299	1.47279	NA	3.51173	1297.32	2.83052	1.34865e-06	10.7108	0.0310003	34.9539	13.5176	222.994	1.71512	0.000467185	10.3862	7.62729	33.0945	21.9976	767.762
60	65.75	27.75	70	21.3006	14.0591	27.9754	49.0323	0	0	20786.1	3.58419e-06	0.0283811	0.0283847	0.0706854	0	0	0	88.7072	NA	1.13469	0.685826	NA	NA	NA	NA	0.823889	NA	4.21392	0.64256	1.01902	1.60714	0.540043	NA	1.16921	1447.69	2.79084	3.24959e-07	9.12681	0.0354932	29.5923	14.9933	182.083	1.74892	0.000112569	8.39641	6.88792	26.2684	24.791	860.177
61	65.75	28.25	73	21.9657	14.3257	28.9062	44.6452	0	0	12064.9	0	0.0107644	0.0107644	0.05432	0	0	0	95.8696	NA	0.702654	0.406325	NA	NA	NA	NA	0.329951	NA	1.21711	0.251268	0.330269	0.635415	0.544193	NA	0.256723	1265.06	3.04959	0	8.68468	0.0265861	27.9909	16.3963	275.126	1.72861	0	8.35469	6.88345	26.0575	23.9919	844.616
62	65.75	28.75	79	21.5288	13.4984	28.6998	41.3226	0.419355	15.7742	12220.5	0.00260126	0.00914044	0.0117417	0.0192334	0	0	0	98.3828	NA	0.372388	0.235132	NA	NA	NA	NA	0.164982	NA	0.414741	0.197594	0.110402	0.351636	0.310626	NA	0.115421	1202.26	3.06986	0	7.25737	0.0260997	23.6393	15.0142	208.034	1.6169	0	8.24282	6.0915	25.8548	21.9232	807.38
63	65.75	29.25	81	22.4453	14.1338	29.8814	43.6774	0	0	23197.3	0.00365588	0.0153484	0.0190042	0.0144252	0	0	0	99.0706	NA	0.220135	0.154942	NA	NA	NA	NA	0.473787	NA	1.88639	0.132561	0.462014	0.225592	0.229142	NA	0.538933	1074.81	2.89469	4.03663e-06	6.25645	0.0154278	20.0121	17.3155	165.39	1.75865	0.00167646	7.48766	5.48391	23.5621	26.6337	804.49
64	66.25	25.75	99	27.521	22.4464	33.676	24.3871	0.252688	11.3226	31273.8	0.0116368	0.0735525	0.0851893	0.0201186	0	0	0	75.6081	0.0831732	0.715367	0.654747	0.042485	0.0453702	0.165327	0.0373181	0.757329	0.0348673	4.79607	0.617979	0.673679	2.0164	0.742563	0.461841	1.3164	180.951	2.70508	2.14675e-05	9.21451	0.0144092	29.4566	16.5056	181.656	1.74816	0.00371814	10.8231	7.74457	34.2309	26.9905	-17.9598
65	66.25	26.25	98	27.2534	21.2743	33.661	35.2581	0.0967742	4.90323	70407.5	0.0341492	0.0683678	0.102517	0.138719	0.000599784	0	0	68.8055	NA	1.50282	1.29183	NA	NA	NA	NA	1.46255	NA	17.9521	1.38748	1.5795	2.4555	1.53291	NA	2.51703	419.069	2.64861	8.75038e-06	11.6396	0.0250619	37.3023	13.7235	238.23	1.65954	0.0024138	11.3922	8.62959	35.9875	22.9424	40.1676
66	66.25	26.75	92	24.7879	18.171	31.249	40.4194	0.0107527	2.73656	24392.7	0.0015045	0.0664938	0.0679983	0.164139	0	0	0	30.2387	NA	1.65411	1.59057	NA	NA	NA	NA	3.78827	NA	53.5617	1.48174	1.99216	2.07686	1.37545	NA	2.78394	920.189	2.62822	8.62064e-07	14.0752	0.0394731	45.2716	13.1503	220.767	1.71628	0.000365742	10.1371	8.95994	32.2489	22.3924	359.944
67	66.25	27.25	84	21.8444	14.9481	28.1491	46.6774	0	0	48949.1	0.0238447	0.111753	0.135598	0.114919	0	0	0	28.5798	NA	1.98675	2.09596	NA	NA	NA	NA	3.04756	NA	47.8417	2.05011	2.36205	4.7	1.98183	NA	5.8978	1213.4	2.74628	1.52567e-05	11.9704	0.034593	38.9753	14.0728	207.537	1.74042	0.00312416	10.4224	7.74464	33.5207	23.0708	744.442
68	66.25	27.75	79	21.5005	14.4804	28.0359	49.6452	0.709677	17.5753	65979.9	0.0102482	0.0714885	0.0817367	0.162088	0	0	0	51.4298	NA	4.43165	2.12118	NA	NA	NA	NA	2.01775	NA	24.3571	2.14109	4.27219	4.09393	1.82383	NA	3.85095	1445.92	2.68156	1.67131e-05	10.6912	0.0396069	34.9772	13.9217	203.74	1.71691	0.00220526	10.427	7.3496	33.3079	23.6607	1037.43
69	66.25	28.25	82	19.8918	12.6157	26.7344	47.6129	0.376344	13.457	68102.8	0.0194159	0.0799077	0.0993236	0.090867	1.44715e-05	0	0	73.4537	NA	2.6218	1.59397	NA	NA	NA	NA	2.0203	NA	10.556	1.39569	2.07347	2.49523	2.62097	NA	1.71153	1701.33	2.73808	7.18723e-06	9.83722	0.0344787	32.1144	14.3598	185.048	1.7038	0.00115916	9.97706	7.18592	31.7043	23.9339	1339.81
70	66.25	28.75	92	18.3743	10.7611	25.5364	45.7419	0	0	36325.5	0.00863377	0.0810549	0.0896887	0.0611845	0	0	0	89.0213	NA	1.24529	1.24855	NA	NA	NA	NA	0.795366	NA	3.09536	1.03282	0.671021	1.34247	1.40534	NA	0.685994	1880.76	2.8163	2.77308e-06	10.4275	0.0328786	33.7982	14.7978	199.817	1.73161	0.000734432	9.42817	7.51476	29.8555	23.9129	1288.59
71	66.25	29.25	96	18.4202	10.4584	25.8496	50.3871	0	0	21053.6	0.0132825	0.0418267	0.0551092	0.069161	0	0	0	91.9232	NA	0.927521	1.15524	NA	NA	NA	NA	0.541923	NA	2.11664	0.965833	0.530596	0.880948	0.882376	NA	0.619297	1674.14	2.99546	1.2075e-05	9.96807	0.0355832	32.2573	16.3744	279.123	1.8131	0.0031907	8.8813	7.28439	28.0045	24.3833	1060.15
72	66.25	29.75	109	19.5978	11.2861	27.2624	63.3226	0	0	74798.7	0.0113386	0.0304997	0.0418384	0.0941571	0.00100786	0	0	66.5777	NA	0.415382	1.06619	NA	NA	NA	NA	0.60938	NA	2.18459	0.927717	0.553576	0.423983	0.41701	NA	0.647443	1531.84	2.87384	1.13465e-05	8.6426	0.0354165	28.0489	15.4833	259.484	1.74135	0.00191318	8.08807	6.54519	25.4461	24.4753	1003.42
73	66.75	25.25	128	27.8009	23.3008	33.4389	10.2258	0	0	117403	0.0201286	0.0968468	0.116975	0.100672	0.00192211	0	0	39.5426	0.0948965	2.74913	1.42008	0.063405	0.0905414	0.0851593	0.0317869	1.9571	0.119641	8.14095	1.55449	1.92349	2.57053	2.27243	0.506055	1.64875	80.8707	2.90538	0	3.62068	0.017746	12.1273	17.7011	66.889	1.72504	0	4.42155	3.3311	13.6705	26.9306	-12.5264
74	66.75	25.75	122	27.5279	22.2209	33.995	20.1613	0.0107527	0.0430108	40540.1	0.00803731	0.0484342	0.0564715	0.142222	0.000451769	0	0	53.1068	0.0909906	2.24163	1.44718	0.0530696	0.0932457	0.0886036	0.0299527	1.85396	0.126521	24.0896	1.52269	2.27513	3.61811	1.52123	0.500239	3.71788	194.927	2.8881	0	6.07095	0.0180816	19.9912	16.1493	177.919	1.65361	0	8.20758	5.26312	25.9489	24.4613	13.838
75	66.75	26.25	113	25.9951	19.712	32.64	32.3871	0	0	20667.7	0	0.0094185	0.0094185	0.210302	0	0	0	30.8151	NA	1.58456	1.4089	NA	NA	NA	NA	1.78277	NA	53.5779	1.40321	1.79662	3.16762	1.49245	NA	3.5144	538.49	2.67089	0	12.9937	0.0282863	42.0231	13.6656	263.803	1.69108	0	10.6664	8.35002	34.2403	21.2705	46.2408
76	66.75	26.75	109	24.4157	17.6044	30.9933	35.4839	0.0913978	2.18817	25634.3	0	0.0205311	0.0205311	0.212182	0	0	0	10.4597	NA	0.744515	0.662136	NA	NA	NA	NA	0.926534	NA	83.0944	0.671088	0.919483	1.10053	0.675527	NA	1.28961	841.033	2.54627	6.29371e-06	16.2494	0.0347701	52.3339	12.9291	242.537	1.72225	0.00100922	11.2117	9.70643	35.9464	21.4904	269.127
77	66.75	27.25	102	22.2764	15.1905	28.5339	45.3548	0	0	23403.8	0	0.0998473	0.0998473	0.169305	0	0	0	9.5048	NA	0.908834	0.786115	NA	NA	NA	NA	0.886663	NA	80.7541	0.838675	1.06158	2.07054	0.917943	NA	2.81428	1133.85	2.57356	6.33493e-05	17.166	0.0379022	55.521	12.9181	268.584	1.73491	0.00718452	12.7482	9.96804	41.0695	21.5431	537.86
78	66.75	27.75	100	21.6731	14.5293	27.9946	47.3226	0	0	87302.6	0.00968373	0.0520556	0.0617394	0.157805	0.00151303	0	0	25.7617	0.0322132	4.65761	1.9716	NA	NA	NA	NA	1.80157	NA	50.8158	2.00078	4.81292	2.89119	1.91807	NA	3.88968	1309.98	2.54588	8.97032e-05	16.1002	0.0342691	52.4788	13.6033	241.526	1.76064	0.00937846	14.0589	9.94602	45.2779	23.3433	710.376
79	66.75	28.25	100	19.7633	12.3537	26.3419	46.3548	0.290323	9.63978	32931.9	0.011562	0.067065	0.078627	0.132899	0	0	0	45.0473	0.0299749	3.60711	2.22174	NA	NA	NA	NA	3.90689	NA	29.322	2.34521	3.48191	3.07252	4.37915	NA	3.15291	1506.77	2.55762	4.2216e-05	15.9168	0.0369543	51.9452	13.4375	340.119	1.75907	0.00622104	13.3396	9.65802	42.9271	23.5563	809.331
80	66.75	28.75	104	16.7427	9.08007	23.537	42.3871	0	0	45067.8	0.0294536	0.190132	0.219586	0.0534839	0	0	0	79.79	NA	1.94705	1.83781	NA	NA	NA	NA	1.51428	NA	7.17339	1.7269	1.13611	2.03351	2.32418	NA	1.05986	1904.96	2.84135	0.00017797	14.3102	0.0324075	46.9034	13.9511	323.626	1.74821	0.00836288	12.7059	8.92825	40.9882	22.5516	1195.06
81	66.75	29.25	105	16.6539	8.77314	23.7762	46.3226	0	0	62667.1	0.035465	0.165177	0.200642	0.0700651	0.000791655	0	0	79.6327	NA	1.81858	2.83828	NA	NA	NA	NA	1.16451	NA	6.59108	2.1687	1.13843	1.92784	1.91473	NA	1.34765	1939.9	2.82845	0.000192021	13.2654	0.0285366	43.513	15.049	283.776	1.80789	0.00914545	13.0705	8.6389	42.0492	24.163	1310.87
82	66.75	29.75	116	16.8139	8.60759	24.2537	61.1613	0.349462	11.9409	113789	0.0652855	0.149448	0.214734	0.0767857	0.000659579	0	0	76.9309	NA	1.87523	2.4472	NA	NA	NA	NA	1.66283	NA	8.76398	1.92234	1.35828	1.91506	2.09219	NA	1.57529	1764.41	2.86958	0.000109373	10.8673	0.0218379	35.8418	16.2813	280.922	1.82287	0.00897311	12.5497	7.53565	40.6848	25.6214	1256.79
83	66.75	30.25	123	17.5121	8.9594	25.2253	68.7097	3.54839	71.5538	408865	0.0439984	0.0826426	0.126641	0.0843472	0.0113173	0	0	85.2154	NA	1.24421	1.35463	NA	NA	NA	NA	1.13989	NA	6.04322	0.870025	0.922703	1.23992	1.51187	NA	0.998757	1678.58	2.93712	4.86324e-05	7.98092	0.0180355	26.3576	16.9242	227.512	1.84363	0.00397374	8.69067	5.77024	28.0003	25.9379	1301.58
84	66.75	30.75	113	16.7226	8.40732	24.2554	66	1.02688	24.8387	285775	0.0507231	0.0923652	0.143088	0.112494	0.00567133	0	0	80.3706	NA	1.31746	1.7673	NA	NA	NA	NA	0.709177	NA	1.62245	0.75509	0.850333	2.02379	1.17561	NA	0.484161	1868.98	2.9418	7.47407e-06	8.31112	0.0261742	27.2281	14.6736	301.004	1.72699	0.000539812	7.5832	6.06166	23.9892	22.9491	1340.41
85	67.25	25.25	141	27.7341	22.7991	34.2111	8.12903	0.83871	9.07527	434430	0.0143941	0.0811587	0.0955528	0.0832618	0.00910011	0	0	59.9392	0.141108	2.82935	1.69081	0.107503	0.0566521	0.0821057	0.042461	2.28131	0.0827084	15.8819	1.63768	2.77243	2.33337	4.54251	0.359525	2.07679	187.988	2.77184	0	4.48219	0.0187952	15.0969	15.7846	101.714	1.67192	0	5.47865	3.78762	17.1654	25.7102	29.6158
86	67.25	25.75	135	26.933	21.0865	33.9768	13.9355	0.607527	8.84946	39148.3	0.000178729	0.0234778	0.0236565	0.124683	0	0	0	57.3192	NA	2.18292	1.46067	NA	NA	NA	NA	1.40232	NA	25.5699	1.4176	2.3406	4.00815	1.41763	NA	3.38605	344.26	2.64489	0	8.54619	0.0226726	28.1418	14.5999	164.606	1.72327	0	9.24844	5.9834	29.506	24.2783	107.809
87	67.25	26.25	131	26.8872	20.0909	34.1244	20.3226	0.408602	7.39785	36288.8	0.00554876	0.0915263	0.0970751	0.0573492	0	0	0	71.2085	NA	1.14801	1.41787	NA	NA	NA	NA	1.07749	NA	17.2109	1.1015	1.17898	2.46313	1.07122	NA	2.22204	401.369	2.41475	0	9.27913	0.0140514	30.7148	15.1828	216.916	1.7567	0	9.72996	6.18405	31.3282	26.2084	51.5819
88	67.25	26.75	136	27.1827	19.617	34.3114	13.3871	0.145161	3.13441	81053.5	0.0130951	0.127125	0.140221	0.0987497	0	0	0	47.1553	0.0527726	1.62992	5.09457	NA	NA	NA	NA	1.61192	NA	35.3325	1.70751	1.7202	2.26789	1.64463	NA	2.28256	452.669	2.39096	2.50443e-05	11.5465	0.0203669	37.5846	14.7533	283.32	1.72813	0.00401594	9.7249	7.21997	30.9103	25.8851	33.3809
89	67.25	27.25	137	25.3803	17.6579	32.11	22.3871	0.0430108	2.89247	50573.9	0	0.125648	0.125648	0.114123	0	0	0	26.4928	0.0644597	1.92263	7.41093	NA	NA	NA	NA	1.99036	NA	46.8239	2.03736	2.19024	4.47588	1.77214	NA	5.3258	641.002	2.4477	9.54782e-05	14.5669	0.0230724	47.4243	13.8408	349.639	1.71537	0.00855669	11.1013	8.55596	35.4754	23.9049	42.8415
90	67.25	27.75	132	24.2368	16.5447	30.7839	35.0968	0	0	48957.4	0.00526042	0.116022	0.121282	0.13056	0	0	0	22.6656	NA	4.16429	7.05169	NA	NA	NA	NA	2.37225	NA	46.2272	2.67799	5.03478	3.36015	2.07626	NA	4.89153	812.94	2.51477	0.000112784	16.7292	0.0204087	54.8382	14.0874	317.946	1.78457	0.00949313	12.8058	9.24921	41.2821	24.0718	100.561
91	67.25	28.25	118	23.0729	15.2608	29.5969	40	0.629032	13.1022	42876.8	0.00877944	0.0986371	0.107416	0.0994216	0	0	0	45.448	0.0161333	3.08515	4.02329	NA	NA	NA	NA	3.80698	NA	28.7491	2.36417	3.37812	2.85741	3.69376	NA	3.12621	790.683	2.47956	5.41824e-05	16.9058	0.0147167	55.2976	14.4842	403.232	1.80006	0.00640041	12.8951	9.2225	41.479	25.3675	58.0493
92	67.25	28.75	112	23.7784	15.7494	30.6379	35.9677	0	0	63553.4	0.0275472	0.148364	0.175912	0.0799545	0.000880554	0	0	66.1097	NA	2.62987	3.34964	NA	NA	NA	NA	2.4982	NA	13.321	2.99001	1.92494	2.59861	3.22763	NA	1.89152	945.626	2.51829	0.000664276	15.8346	0.00823033	51.8533	13.7876	484.109	1.75847	0.0216487	13.2046	8.99696	42.5618	24.3561	66.3341
93	67.25	29.25	120	21.5961	13.4512	28.6956	37.2581	0	0	26193	0.0040377	0.169444	0.173482	0.0736619	0	0	0	58.9599	0.00805938	2.39345	3.86601	NA	NA	NA	NA	1.94643	NA	20.6432	3.59075	1.88433	2.39788	2.45137	NA	2.40451	1305.12	2.54258	0.000714529	15.9216	0.0157828	51.9699	13.9351	432.447	1.78816	0.0238721	14.028	9.34827	44.984	24.5652	235.337
94	67.25	29.75	122	20.3887	12.0488	27.6394	52.3871	0	0	51225.4	0.0224031	0.147695	0.170098	0.105151	0	0	0	44.6447	NA	2.03444	3.06581	NA	NA	NA	NA	2.6366	NA	35.5503	2.77323	2.39468	1.96684	2.6538	NA	2.82185	1472.95	2.55132	0.000295977	16.3515	0.0189069	53.3583	13.4922	437.89	1.75483	0.0155782	14.8951	9.71801	48.017	23.8687	374.008
95	67.25	30.25	116	14.6502	6.65603	21.8297	67.2581	0	0	286439	0.0199192	0.169303	0.189222	0.126015	0.00869225	0	0	38.2195	0.0160868	3.6932	2.71031	NA	NA	NA	NA	4.20375	0.0080441	32.8775	2.52717	4.17147	3.2526	4.75463	NA	4.11653	1933.18	2.85087	0.000235725	15.6632	0.0229249	51.2409	14.0915	436.363	1.77945	0.0150129	13.8847	9.00134	44.8799	21.7248	1117.53
96	67.25	30.75	116	15.2768	7.32037	22.5066	67	0	0	163002	0.0326676	0.0829429	0.11561	0.163012	0.0017656	0	0	67.1913	NA	3.78867	2.00182	NA	NA	NA	NA	2.5651	NA	10.6152	2.02832	3.6038	3.66136	2.48606	NA	2.59814	2106.96	2.94009	4.73973e-05	10.4462	0.0343082	34.075	15.1888	339.661	1.78502	0.00297762	8.86346	6.95131	28.1487	23.7847	1462.94
97	67.75	24.25	148	28.6171	24.0402	34.7595	7.35484	826.473	6807.3	219987	0.215626	0.0899439	0.30557	0.0408711	0	0	0	10.6416	0.41128	23.2026	7.03927	0.264026	0.263289	0.203281	0.275223	8.23344	0.560952	8.68418	7.25472	3.6041	2.78553	11.9398	1.16905	3.42117	3.67387	2.61085	0	0.919165	0.00217656	3.73347	23.552	2.34541	1.79328	0	0.946962	1.14235	2.02292	35.165	-23.3213
98	67.75	24.75	151	28.7894	23.6795	35.5337	7.80645	0	0	358541	0.219746	0.110902	0.330648	0.0687373	1.39283e-19	0	0	44.9099	0.18476	13.3195	6.85879	0.115252	0.0568249	0.0967388	0.0773315	4.50004	0.173176	8.47984	4.40325	3.0174	1.23782	9.7165	0.661803	2.62559	46.7859	2.67663	0	1.6029	0.00386316	5.92108	20.3851	49.4891	1.7176	0	1.91701	1.69088	5.54788	31.798	-20.5666
99	67.75	25.25	146	28.3192	22.6981	35.761	8.54839	0.0698925	0.376344	89920	0.000831827	0.0449788	0.0458106	0.0400549	0	0	0	85.6737	0.131697	3.03058	1.85024	0.0909221	0.0103962	0.0895099	0.0409715	1.04787	0.103202	2.38154	1.09101	1.03949	0.886482	2.42223	0.646314	0.897817	179.903	2.63592	0	3.01994	0.0087421	10.3048	17.4546	73.4574	1.72006	0	3.6194	2.87587	10.9744	28.8448	37.0774
100	67.75	25.75	139	27.5396	20.9069	35.2776	8.87097	0	0	63961.5	0.00167902	0.0259974	0.0276764	0.0141754	0	0	0	89.2182	0.139174	1.11308	1.94613	NA	NA	NA	NA	0.736721	NA	2.29117	0.812951	0.758992	1.72556	0.889497	NA	1.0264	280.981	2.57895	0	6.22508	0.0110689	20.4021	16.3423	123.211	1.7457	0	6.82871	5.13573	21.1363	27.3727	92.7708
101	67.75	26.25	139	28.3218	20.6338	36.3053	6.93548	1026.92	7190.73	184548	0.0970752	0.0772138	0.174289	0.0251447	0	0	0	64.277	0.0972189	1.24183	8.46172	0.0724111	0.0563126	0.072401	0.201142	1.30756	0.128703	15.4882	1.39513	1.33592	1.0679	1.4436	3.14547	1.82485	171.507	2.54883	0	4.87894	0.00748138	16.1451	20.3288	163.855	1.83988	0	6.49036	4.46687	20.2157	32.2453	31.2581
102	67.75	26.75	141	29.08	20.6531	37.0835	6.03226	1084.95	7307.28	706819	0.465844	0.0451361	0.51098	0.027008	0	0	0	35.538	0.036286	2.02086	30.6603	NA	NA	NA	NA	2.31317	NA	19.6783	2.23489	2.13772	0.513588	2.38487	NA	2.46805	63.4316	2.57879	0	1.79535	0.00298277	6.38101	21.6999	38.4708	1.81078	0	2.03776	1.89144	5.52186	33.5425	20.6077
103	67.75	27.25	142	29.4071	20.8005	36.9896	6.3871	7.76344	121.839	730705	0.478144	0.0915791	0.569723	0.0453697	0	0	0	24	0.0803467	1.39307	43.9175	0.0724024	0.0402229	0.056304	0.12067	2.21857	0.0884833	15.5074	2.95413	2.29707	1.67404	1.78589	0.378153	4.17827	56.4959	2.561	0	1.59471	0.00555831	5.7558	21.8785	25.8823	1.78447	0	2.10601	1.9633	5.77192	33.9073	17.2107
104	67.75	27.75	139	29.6342	21.1712	36.817	11.1935	7.96774	124.215	448398	0.411652	0.130347	0.542	0.0373069	0.000330881	0	0	21.5395	0.0927963	1.57425	41.7166	NA	NA	NA	NA	2.83552	NA	16.5052	5.00044	3.31787	1.17853	1.35205	NA	5.39146	102.254	2.5166	0	2.95245	0.00978065	10.1676	20.6837	152.84	1.78419	0	5.43026	2.98847	16.9408	32.945	23.5744
105	67.75	28.25	132	29.5631	21.1422	36.5848	15.6452	7.93011	125.887	182347	0.473123	0.0855178	0.55864	0.0218709	0.0014237	0	0	52.472	NA	1.13019	22.9016	NA	NA	NA	NA	2.79243	NA	10.8575	2.76411	2.25917	1.03848	1.51109	NA	2.81703	73.6285	2.54981	0	1.98505	0.00276242	6.82703	20.8399	45.9819	1.78255	0	2.60988	2.18297	7.4213	32.8421	33.7829
106	67.75	28.75	123	29.3164	20.9203	36.3166	21.5484	6.65591	107.774	82382	0.128543	0.426134	0.554677	0	0	0	0	88.2765	NA	0.726006	4.22002	NA	NA	NA	NA	0.818871	NA	2.73554	0.938703	0.629888	0.6338	0.85677	NA	0.7074	87.9108	2.5806	0	2.33168	0.00105437	7.73681	19.8893	36.5503	1.75978	0	3.21083	2.57812	9.63785	31.7993	44.5057
107	67.75	29.25	117	28.431	20.0037	35.4472	29.0968	5.00538	82.1344	136748	0.152527	0.208029	0.360555	0.00095597	0.00122111	0	0	86.3101	NA	1.24065	1.9308	NA	NA	NA	NA	0.856992	NA	4.76696	1.71414	0.753008	1.06218	1.11418	NA	0.79457	182.152	2.54073	0	4.75423	0.0063191	15.5905	17.9958	132.001	1.74781	0	7.0517	4.46644	22.4128	30.1726	73.0332
108	67.75	29.75	123	26.4554	18.0044	33.4995	36.3226	3.52151	53.871	75587.9	0.0386771	0.0836156	0.122293	0.128182	0.0015427	0	0	42.8624	NA	1.5486	2.57449	NA	NA	NA	NA	2.35891	NA	41.2656	2.71951	1.76922	1.53194	2.17548	NA	1.73737	574.145	2.5008	3.04389e-05	12.4037	0.0168095	40.0388	13.9155	321.695	1.68895	0.0049503	11.4472	8.2537	36.4133	24.5797	115.02
109	67.75	30.25	119	16.3906	8.3913	23.177	59.7097	1.15054	20.4301	77465	0.0268223	0.193262	0.220084	0.12039	0.000352741	0	0	17.6231	NA	3.16461	2.3852	NA	NA	NA	NA	3.9684	NA	55.4353	2.65013	5.03051	1.99173	3.24378	NA	5.05075	1778.74	2.52054	0.000323197	17.6631	0.0265185	57.3264	12.4674	508.998	1.71235	0.016875	13.775	9.53857	44.0574	21.2376	696.243
110	67.75	30.75	113	13.857	6.30279	20.6062	70.2903	0	0	78297.1	0.0111796	0.0797408	0.0909204	0.184534	0.000111607	0	0	46.6412	NA	4.51164	2.57494	NA	NA	NA	NA	5.21584	NA	20.92	3.26069	5.35596	4.93934	2.79415	NA	4.32895	2213.06	2.59646	7.6557e-05	13.2056	0.0385324	42.7679	15.2011	332.708	1.85497	0.00404837	11.0305	8.22292	35.0334	25.7493	1494.4
111	67.75	31.25	108	13.8539	6.57345	20.7261	74.6774	0	0	38477.7	0.00216028	0.040161	0.0423213	0.145627	0	0	0	64.5104	NA	1.01599	0.634383	NA	NA	NA	NA	1.34105	NA	2.6828	0.78259	1.14349	1.74325	0.641064	NA	0.941408	2258.37	2.83546	1.0832e-07	7.66561	0.0353369	24.6293	18.4148	175.039	1.97956	6.49919e-05	7.60855	6.01178	23.3829	29.2138	1907.56
112	68.25	24.25	143	29.0398	23.7631	36.1236	7.74194	0	0	127814	0.196952	0.044066	0.241018	0.0451584	0	0	0	13.8176	0.392464	16.9345	6.64445	0.198194	0.182538	0.206151	0.140282	8.00243	0.47431	14.0599	6.23533	3.43672	2.06305	11.1251	1.64361	3.44433	4.63555	2.59421	0	1.00524	0.00235967	3.9524	24.5764	2.58156	1.78754	0	1.08042	1.27828	2.42157	36.1364	-26.035
113	68.25	24.75	147	29.4731	23.6958	37.1945	6.93548	881.538	6943.49	481483	0.448293	0.0519474	0.500241	0.0458135	0	0	0	12.8343	0.316538	22.9838	17.2035	0.174576	0.146707	0.221378	0.153779	4.60817	0.29827	8.34076	4.84968	3.71793	0.843672	21.4435	2.83833	3.10898	13.169	2.59289	0	1.13222	0.00242926	4.34332	23.5371	8.43827	1.78571	0	1.11769	1.32546	2.64855	35.3575	-15.4303
114	68.25	25.25	146	29.8216	23.3754	37.9534	9.58065	926.457	7022.74	1.38381e+06	0.203545	0.0576355	0.26118	0.0444155	0.0329938	0	0	50.793	0.0877909	11.4736	9.33528	NA	0.0290135	NA	NA	2.29242	0.0482256	5.96322	2.68666	2.79108	0.845859	11.191	NA	2.64131	49.9869	2.52146	0	1.89761	0.00283367	6.67439	20.2536	31.7062	1.76011	0	2.18958	2.03165	6.21348	32.6538	-11.2995
115	68.25	25.75	137	29.6235	22.1928	38.2155	9.16129	966.844	7098.44	392297	0.197367	0.0771987	0.274565	0.0787488	1.56029e-19	0	0	50.6657	0.163808	4.98266	16.0057	NA	NA	NA	NA	2.04948	NA	11.2832	2.76935	2.40931	1.16581	4.95586	NA	4.0902	69.6589	2.44338	0	2.46003	0.0028013	8.33729	20.1151	49.7697	1.80972	0	3.01854	2.66921	8.71023	33.0875	2.69824
116	68.25	26.25	134	29.2026	20.7186	38.1715	6.3871	0	0.150538	922557	0.552837	0.0380793	0.590916	0.0520069	0	0	0	14.9426	0.0971253	3.01631	39.0815	NA	NA	NA	NA	2.8474	NA	26.0297	3.05253	2.9555	0.503862	4.35238	NA	3.66453	43.0542	2.56915	0	1.82981	0.00323505	6.34145	20.7801	21.1896	1.81171	0	2.00404	1.99681	5.5406	32.7898	9.38436
117	68.25	26.75	137	29.1934	20.384	37.9252	5.90323	0	0.107527	838141	0.561632	0.0339872	0.59562	0.0494802	0	0	0	11.0509	0.0727314	3.30456	55.3613	NA	NA	NA	NA	2.36657	NA	16.7632	2.20159	2.31848	0.248131	4.48335	NA	2.37983	43.2898	2.64334	0	1.49799	0.00395431	5.49361	20.8069	6.54604	1.79162	0	1.27021	1.49733	3.18192	32.2042	18.2491
118	68.25	27.25	142	29.7156	21.1771	37.8749	7.67742	1103.42	7430.26	918679	0.542494	0.0617398	0.604233	0.055781	0	0	0	6.22013	0.0365218	2.9585	63.3044	NA	NA	NA	NA	2.23867	NA	11.815	2.97318	2.1839	0.415423	4.00318	NA	4.39705	50.5052	2.65728	0	1.12948	0.00462508	4.39812	21.9023	5.857	1.79705	0	1.05625	1.25059	2.44268	33.2127	23.7454
119	68.25	27.75	139	30.0097	21.8717	37.7305	11.0323	1159.13	7546.9	1.02759e+06	0.589196	0.0291683	0.618364	0.0504406	0.016662	0	0	1.00087	0.0377027	1.75869	73.8858	NA	NA	NA	NA	2.39447	NA	7.92067	4.64192	2.22297	0.134869	2.40713	NA	4.15002	52.8224	2.65484	0	0.985887	0.00335787	3.91286	22.1719	3.74905	1.80911	0	0.880549	1.1271	1.78505	33.5208	24.1203
120	68.25	28.25	134	29.94	21.9294	37.3786	13.2903	0	0	635831	0.61111	0.0212649	0.632375	0.0474938	0.0070292	0	0	6.07925	NA	0.511833	74.8097	NA	NA	NA	NA	3.05635	NA	5.40956	4.01355	2.57986	0.165065	1.28423	NA	2.62951	58.5074	2.63194	0	1.09608	0.00197938	4.15648	21.4541	6.62015	1.77901	0	0.882905	1.21652	1.72398	32.9207	35.1173
121	68.25	28.75	127	29.5611	21.4608	36.793	17.871	0.0215054	0.521505	157459	0.238103	0.288739	0.526842	0.00956383	0.00245649	0	0	79.1549	NA	0.287829	14.9855	NA	NA	NA	NA	1.01912	NA	1.96174	1.04514	0.717673	0.271439	0.49083	NA	0.609297	119.133	2.69749	0	2.39476	0.00189632	7.94909	19.2625	49.0748	1.73601	0	2.29724	2.52761	5.98567	30.0875	45.5297
122	68.25	29.25	116	27.4984	19.3539	34.5019	28.4839	0.650538	12.5699	38628.4	0.0452718	0.15294	0.198212	0.0514886	0	0	0	84.3	NA	0.827149	2.28089	NA	NA	NA	NA	0.70766	NA	7.43128	1.97168	0.752881	0.789132	0.85149	NA	0.631373	267.171	2.84291	0	5.84261	0.00723197	18.8012	17.9541	146.006	1.75829	0	7.15415	5.23851	22.147	27.075	90.0112
123	68.25	29.75	121	23.7675	15.6486	30.5177	43.2903	1.15591	22.6398	31949.1	0.0186334	0.098457	0.11709	0.124279	0	0	0	37.3514	NA	1.79835	3.78243	NA	NA	NA	NA	3.41567	NA	40.6475	3.84361	2.36593	1.829	2.97193	NA	2.53776	680.49	2.72437	2.14665e-05	12.8169	0.0171044	41.4444	14.5723	348.572	1.74008	0.00371805	11.497	7.92909	36.4189	22.7125	162.275
124	68.25	30.25	119	17.7312	9.98211	24.2711	67.0645	0	0	54837.2	0.0119355	0.160336	0.172271	0.104643	0	0	0	42.6821	NA	3.55494	2.52041	NA	NA	NA	NA	4.45488	NA	30.4566	2.44628	3.86018	2.79719	4.16457	NA	3.60461	1642.88	2.34229	0.000101772	13.8534	0.0362744	44.6293	13.692	351.551	1.73057	0.00878259	13.4537	8.41069	42.0836	25.7758	736.343
125	68.25	30.75	115	18.0588	10.3767	24.6855	73.8387	0.784946	23.7473	53783.8	0.0187845	0.0663015	0.085086	0.16936	0.000321204	0	0	56.7468	0.00913005	5.14488	2.75569	NA	NA	NA	NA	5.92406	NA	10.5803	3.29206	4.64848	5.57489	2.75856	NA	3.11181	1883.27	2.36047	2.50646e-05	10.3581	0.0348263	33.3291	15.7879	279.277	1.81122	0.00297364	10.7084	7.21768	33.3834	28.5384	1389.44
126	68.25	31.25	111	16.785	9.4412	23.4288	72.3548	0	0	15144.4	0	0.0622361	0.0622361	0.120216	0	0	0	87.6855	NA	1.39268	0.965373	NA	NA	NA	NA	1.79893	NA	1.66622	1.23083	1.15296	2.64995	0.874728	NA	1.12507	2094.55	2.66362	4.31032e-07	8.31007	0.0352141	26.6152	17.062	154.103	1.89352	0.000258619	8.78236	6.67357	26.9027	29.244	1816.06
127	68.25	31.75	108	16.4429	9.27384	23.0521	82.2258	0	0	13893.6	0	0.0400999	0.0400999	0.235759	0	0	0	41.3374	NA	0.137008	0.149287	NA	NA	NA	NA	0.166656	NA	0.14625	0.157305	0.0863353	0.35644	0.112594	NA	0.143637	2077.86	2.7928	0	4.66518	0.0211698	15.4919	16.7674	74.2208	1.7748	0	5.33287	4.03653	16.5612	28.052	1903.08
128	68.75	24.25	136	29.3471	23.2659	37.3425	7.87097	10.2688	33.5914	83673.7	0.0980163	0.0129067	0.110923	0.0199352	0	0	0	16.1054	0.747528	7.20374	5.58435	0.351964	0.437781	0.482148	0.309921	4.93469	0.944098	13.9298	3.64699	2.53302	1.31164	7.0375	7.96048	2.65287	4.81048	2.6001	0	1.5964	0.00537579	5.55403	27.2276	4.7747	1.77486	0	1.58751	1.85801	4.04306	38.5737	-28.2558
129	68.75	24.75	136	29.6541	22.9421	38.0538	7.48387	0	0.145161	572027	0.496987	0.0563189	0.553306	0.0410864	0	0	0	18.2168	0.811937	27.8987	18.7178	NA	NA	NA	NA	3.22746	NA	7.93223	3.36831	2.49618	0.267155	27.1132	NA	1.77152	10.3267	2.62191	0	1.14964	0.00348764	4.36122	23.2221	3.62293	1.79566	0	1.07373	1.32769	2.40719	34.6882	-14.0179
130	68.75	25.25	135	30.0436	22.8248	38.7518	8.93548	0	0.155914	927614	0.610786	0.00450277	0.615288	0.0497404	0	0	0	0.0957301	0.0371356	32.0187	22.771	NA	NA	NA	NA	2.94344	NA	6.69252	4.05702	3.85881	0.0158093	24.7141	NA	3.3697	17.3049	2.60565	0	1.08658	0.00312217	4.19323	21.728	3.70829	1.80273	0	0.941491	1.20264	2.07629	33.36	-2.6338
131	68.75	25.75	131	29.915	21.9485	38.9495	9.09677	0	0.150538	863830	0.641113	2.84626e-06	0.641116	0.0573688	0	0	0	0.739956	0.0662274	16.5819	40.6936	NA	NA	NA	NA	3.11448	NA	11.422	4.44073	3.38543	0.143612	13.8145	NA	6.26467	21.8876	2.60996	0	1.1016	0.00232782	4.24945	21.9276	3.12688	1.80826	0	0.96864	1.23181	2.12877	33.5426	-1.45821
132	68.75	26.25	125	29.3918	20.7814	38.5693	6.6129	0	0.322581	487179	0.420218	0.0631234	0.483341	0.0635829	0	0	0	25.7612	0.0617426	6.5487	24.4268	NA	NA	NA	NA	2.73633	NA	24.7946	2.96012	2.6021	0.853658	5.56538	NA	4.22565	31.69	2.64597	0	1.82584	0.00629064	6.44542	20.2929	7.76912	1.7778	0	1.69155	1.86232	4.54764	31.7467	4.34279
133	68.75	26.75	126	29.2741	20.5512	38.0696	6.67742	0	0	104931	0.0531762	0.0647797	0.117956	0.0209959	0	0	0	67.4603	0.0594884	2.16942	8.65047	NA	NA	NA	NA	1.37199	NA	13.9283	1.46621	1.33796	0.647741	1.70473	NA	1.79439	48.6483	2.66155	0	3.17239	0.00697788	10.7352	17.2834	11.1936	1.73797	0	2.30413	2.61751	6.68874	28.2074	10.3165
134	68.75	27.25	132	29.5922	21.202	37.8412	10.3548	0	0	453836	0.295306	0.0409926	0.336298	0.0339588	0	0	0	44.275	0.104455	2.64823	36.5409	NA	NA	NA	NA	1.4651	NA	5.02955	2.01569	1.55358	0.828265	3.77046	NA	2.34168	60.7323	2.65672	0	2.35269	0.00607496	8.03482	18.982	16.4608	1.77564	0	2.00003	2.25669	5.52923	30.2818	24.6203
135	68.75	27.75	138	29.8407	21.9967	37.5872	12.871	1223.49	7743.85	1.29566e+06	0.468274	0.095329	0.563603	0.0507641	0.0177406	0	0	7.7565	0.231407	5.79758	58.2376	NA	NA	NA	NA	2.78795	NA	5.973	4.76634	2.96567	0.369242	7.46566	NA	4.20614	62.0619	2.65642	0	1.40548	0.00431473	5.12345	21.131	6.74775	1.80238	0	1.19389	1.51201	2.81147	32.5671	29.5802
136	68.75	28.25	136	29.8891	22.0656	37.4856	14.0968	0	0	689171	0.560109	0.0440241	0.604133	0.0495578	0.00102	0	0	11.0246	0.25633	1.8753	64.1126	NA	NA	NA	NA	4.02489	NA	4.57184	4.75391	3.37567	0.371251	3.81106	NA	2.5053	66.1621	2.65287	0	1.12809	0.0027246	4.31013	21.1052	14.3412	1.75313	0	0.961377	1.24865	2.08912	32.4566	34.1993
137	68.75	28.75	126	28.3861	20.535	35.7001	17.3226	0	0	66488.1	0.0356048	0.0637155	0.0993203	0.0240269	0.000910721	0	0	78.1711	NA	0.437646	13.3109	NA	NA	NA	NA	1.67992	NA	3.48185	1.34026	1.26735	0.367475	0.933511	NA	0.572741	264.754	2.73151	0	3.95628	0.00502767	13.237	16.9298	169.426	1.68448	0	5.30078	3.92194	16.1252	26.6819	52.6608
138	68.75	29.25	113	23.2336	15.6547	30.0006	39.7742	0.349462	9.05914	36249	0	0.0750505	0.0750505	0.0665019	0	0	0	78.0616	NA	1.00618	2.24572	NA	NA	NA	NA	0.700933	NA	14.0158	1.98036	0.616639	0.895443	1.01262	NA	0.562252	663.665	2.78993	0	10.028	0.0169112	32.4032	14.7165	229.949	1.7285	0	8.80383	7.06926	27.249	22.8102	190.573
139	68.75	29.75	113	21.5678	13.9752	28.0116	64.2903	0.83871	18.6398	38997.6	0	0.0576299	0.0576299	0.115148	0.000593685	0	0	51.8877	NA	2.07828	3.93515	NA	NA	NA	NA	3.02762	NA	27.0635	3.55032	1.6881	2.27254	3.26391	NA	1.77639	991.528	2.67715	3.14685e-06	12.167	0.0252554	39.1798	14.5514	224.379	1.80348	0.000713633	10.604	7.5908	32.9939	23.9622	426.507
140	68.75	30.25	114	19.3314	11.7546	25.6078	77.6129	0.543011	12.8817	135348	0.0497699	0.102849	0.152619	0.0496481	0.00204485	0	0	47.2932	0.0160882	3.31531	2.48335	NA	NA	NA	NA	3.75128	NA	28.8382	2.36285	3.07072	2.81644	4.08155	NA	2.51914	1334.79	2.52446	7.58239e-07	9.44646	0.032177	30.3693	14.5326	231.392	1.73197	0.000171951	10.1138	6.80667	30.912	26.0555	843.209
141	68.75	30.75	116	18.931	11.4208	25.2297	75.0645	1.28495	33.2903	39369.2	0.0120718	0.102171	0.114243	0.109375	0	0	0	62.146	NA	4.3006	1.82703	NA	NA	NA	NA	2.52614	NA	15.231	1.53491	4.10946	3.92524	2.00348	NA	2.93708	1634.88	2.62642	0	8.11097	0.0336784	26.0275	16.3239	211.349	1.81108	0	9.43486	6.26657	29.1022	27.784	1343.52
142	68.75	31.25	122	17.9237	10.5688	24.1923	74.9355	0.446237	12.6183	24729.5	0.00247407	0.132228	0.134702	0.116275	0	0	0	72.279	NA	2.23069	1.62165	NA	NA	NA	NA	2.75523	NA	8.13843	1.80823	2.02406	4.81358	1.65803	NA	3.21461	1907.58	2.77684	4.49551e-07	10.1297	0.0327087	32.9306	15.8587	184.655	1.81733	0.00026973	10.1379	7.47591	32.1329	27.1865	1556.66
143	69.25	24.75	131	29.5996	22.129	38.4295	7.45161	11.9462	42.4462	400764	0.434703	0.0521814	0.486885	0.0579842	0	0	0	1.17941	NA	8.90267	12.6536	NA	NA	NA	NA	5.34468	NA	40.0803	4.97507	5.82971	0.119317	11.3694	NA	4.40588	15.4826	2.7711	0	2.12839	0.01161	7.36606	19.8339	8.71476	1.79294	0	1.64612	2.00096	4.44489	31.1752	-23.3142
144	69.25	25.25	125	29.6474	21.7668	38.7393	8.48387	11.8441	42.8333	589389	0.602937	1.49787e-09	0.602937	0.0496816	0	0	0	0.21881	0.0160746	15.0945	14.2957	NA	NA	NA	NA	5.74632	NA	30.0162	6.70818	7.17267	0.0532264	13.0021	NA	8.2886	14.6928	2.65786	0	1.28594	0.00410836	4.87837	21.55	5.413	1.80412	0	1.16398	1.36472	2.83704	33.0513	-11.2927
145	69.25	25.75	122	29.5808	21.232	38.7796	8.83871	12.2903	43.7903	577973	0.540345	0.00638255	0.546727	0.0549729	0.0125496	0	0	8.26571	NA	14.7559	12.8739	NA	NA	NA	NA	4.13693	NA	28.1782	5.62743	4.78985	1.34795	11.4005	NA	9.99426	19.313	2.67671	0	1.35575	0.00722074	5.21642	21.8209	5.8245	1.7886	0	1.25595	1.39179	3.34464	33.5105	-13.5088
146	69.25	26.25	119	29.3284	20.6771	38.3726	7.41935	11.8871	44.5161	100538	0.0736083	0.0351846	0.108793	0.0581807	0	0	0	61.5184	0.0241888	5.25633	6.13715	0.00806407	NA	0.0241977	NA	1.71212	0.0403258	12.5979	1.96507	1.85023	1.68483	4.14906	NA	3.60089	38.0239	2.73499	0	2.82779	0.00884739	9.54348	18.7825	11.2777	1.74952	0	2.0974	2.56075	5.72512	30.0686	-11.3608
147	69.25	26.75	115	29.2758	20.5826	37.9685	8.41935	11.7097	44.4355	37776.2	0	0.00255218	0.00255218	0.010444	0	0	0	79.7807	NA	1.47999	1.46794	NA	NA	NA	NA	0.683793	NA	6.02727	0.690517	0.563443	0.601546	0.964844	NA	1.07061	53.3981	2.73123	0	3.90168	0.00817301	12.7928	16.5324	11.4019	1.72152	0	2.45878	3.12006	6.94522	26.9895	13.8969
148	69.25	27.25	120	29.3559	20.8952	37.5725	11.2903	11.8333	43.6022	93413.3	0.0732845	0.021445	0.0947295	0.00586994	0	0	0	74.695	NA	1.85636	3.85271	NA	NA	NA	NA	1.35503	NA	5.29771	1.25581	1.50012	1.87012	2.10169	NA	2.83423	62.0109	2.65377	0	3.07789	0.00496842	10.3804	17.4045	11.6447	1.75706	0	2.07678	2.54891	5.91357	28.4828	29.9572
149	69.25	27.75	125	29.5329	21.5109	37.4459	12.6129	0	0	559761	0.439563	0.0789685	0.518531	0.0432929	0	0	0	20.1272	0.594767	5.64419	48.3714	NA	NA	NA	NA	2.8167	NA	4.58701	3.65493	3.04748	1.08386	7.33866	NA	3.65253	65.6988	2.65188	0	1.80626	0.00517213	6.3103	20.3601	5.77735	1.79184	0	1.3084	1.75816	3.22052	31.8859	38.694
150	69.25	28.25	131	29.4529	21.5142	37.205	13.1935	1311.53	8055.06	608768	0.468486	0.12066	0.589146	0.0419884	0	0	0	21.5127	0.604622	2.71703	53.6325	NA	NA	NA	NA	3.60201	NA	3.22734	4.24121	2.96825	0.719016	4.91409	NA	2.40682	76.5075	2.64894	0	1.20507	0.00587951	4.57698	21.0044	18.3016	1.72029	0	1.06065	1.30378	2.53644	32.6278	42.2929
151	69.25	28.75	132	27.4506	19.631	34.8384	23.1613	0	0	41287.9	0.00231772	0.0530397	0.0553574	0.0291741	0.000433672	0	0	85.9408	0.62249	0.491658	9.7115	NA	NA	NA	NA	3.41235	NA	2.7926	0.897572	2.66769	0.264926	0.884639	NA	0.418432	321.884	2.64851	0	4.1268	0.00804397	13.8534	16.1143	158.108	1.64864	0	5.22029	3.81564	15.7227	26.6269	96.7556
152	69.25	29.25	119	23.3092	15.8746	29.9683	65.6774	0	0	56511.4	0.00432219	0.0592819	0.0636041	0.048397	0	0	0	72.8067	NA	0.622988	1.59713	NA	NA	NA	NA	0.669896	NA	24.2505	1.90054	0.66854	0.535405	0.672292	NA	0.592359	765.255	2.66539	0	7.60592	0.019889	24.7735	15.5343	136.623	1.78332	0	7.69608	5.83668	23.65	25.8882	313.688
153	69.25	29.75	109	20.3818	13.1762	26.5845	78.7097	0	0	74527.3	0.0244921	0.126323	0.150815	0.0941222	0	0	0	45.9199	NA	2.2309	3.19786	NA	NA	NA	NA	3.36181	NA	33.0598	3.18257	1.89598	2.20275	3.54125	NA	1.94916	1099.72	2.8031	1.25221e-05	9.84525	0.0329034	31.9284	15.1753	176.413	1.81164	0.00283973	9.72496	6.86126	30.1599	24.7524	690.989
154	69.25	30.25	106	20.6554	13.375	26.7718	80.2903	0	0	50744	0.0388843	0.153615	0.192499	0.117237	0	0	0	22.5448	NA	2.71932	2.3277	NA	NA	NA	NA	3.87219	NA	54.461	2.18027	3.51352	2.35042	3.46327	NA	3.11075	1264.68	2.8413	3.01722e-06	8.55179	0.0273029	28.032	14.4367	163.352	1.71166	0.000684236	9.09782	6.11423	28.6208	23.5542	916.622
155	69.25	30.75	118	19.6703	12.3471	25.7627	77.2258	0	0	43699.1	0.0525447	0.147631	0.200175	0.120653	0	0	0	28.4343	NA	3.31053	1.60556	NA	NA	NA	NA	2.92059	NA	50.0775	1.5926	4.19118	2.66139	1.8226	NA	3.9273	1543.09	2.80929	0	8.57127	0.0395562	27.8731	15.0725	163.681	1.74438	0	8.74351	6.35463	27.5322	25.1861	1239.61
156	69.25	31.25	131	19.2003	11.8621	25.3281	75.129	2.26344	46.5591	93249.9	0.0272185	0.141437	0.168656	0.138357	0.00194889	0	0	26.6829	NA	2.44803	2.21945	NA	NA	NA	NA	6.77232	NA	42.5003	2.49777	3.62544	5.01989	2.16123	NA	6.6162	1713.48	2.77442	1.78888e-06	10.8343	0.0405125	35.5406	15.1565	232.622	1.79961	0.00107333	10.1361	7.37929	32.5081	25.6845	1286.65
157	69.25	31.75	137	18.0919	10.8821	24.129	75.6452	5.50538	84.3387	22925.7	0.0051955	0.0913211	0.0965166	0.313831	0	0	0	34.1935	NA	1.29145	1.29093	NA	NA	NA	NA	4.70038	NA	14.4258	1.33548	1.89201	1.92393	1.25001	NA	2.52533	1548.22	2.5877	4.31032e-07	13.8678	0.0391445	45.3055	15.034	330.586	1.85763	0.000258619	11.7764	8.52682	37.9691	26.3171	1011.01
158	69.75	24.25	140	29.8893	22.3754	38.6865	5.87097	6.39247	9.68817	48225.1	0.0123162	0.0966596	0.108976	0.0168435	0	0	0	11.7503	NA	0.807419	1.44696	NA	NA	NA	NA	1.05189	NA	52.8079	2.13957	1.11287	0.760709	0.624931	NA	1.10568	27.1724	2.99716	0	3.59036	0.0404545	12.0551	16.4846	18.3904	1.7352	0	2.4238	2.8925	6.96326	27.11	-22.0042
159	69.75	24.75	128	29.4189	21.4539	38.3728	7.80645	0	0	103077	0.00819562	0.222816	0.231012	0.0927729	0	0	0	2.29261	NA	0.510922	1.31667	NA	NA	NA	NA	1.72534	NA	83.7766	1.32365	1.98858	0.233035	0.600564	NA	2.13779	42.7209	3.07719	0	3.66589	0.0406717	12.3576	16.695	19.3484	1.73542	0	2.51011	2.98013	7.2531	27.4057	-6.65976
160	69.75	25.25	123	29.323	20.9098	38.4289	8.29032	0.193548	0.360215	379759	0.239689	0.0985522	0.338242	0.0712797	0	0	0	1.23927	NA	1.5979	5.88817	NA	NA	NA	NA	3.27422	NA	71.4551	4.20933	4.05922	0.366363	1.8297	NA	6.6243	31.7893	2.91619	0	2.55517	0.0210998	8.93775	18.8037	16.569	1.77092	0	2.02058	2.21502	5.98579	29.9887	-7.32877
161	69.75	25.75	121	29.2216	20.5708	38.3716	8.70968	0.650538	1.08602	119360	0.0332387	0.02962	0.0628587	0.105685	0	0	0	26.2981	NA	3.69951	4.34509	NA	NA	NA	NA	2.34893	NA	40.0286	2.63387	3.30234	4.37011	2.7116	NA	6.26121	35.0663	2.95108	0	3.09955	0.0196633	10.7255	17.9286	14.645	1.73021	0	1.95632	2.51364	5.74438	29.5456	-5.48118
162	69.75	26.25	107	29.1626	20.4087	38.0835	8.6129	0.155914	0.564516	53589.5	0	0.000188445	0.000188445	0.0200278	0	0	0	73.9626	NA	1.28121	1.27803	NA	NA	NA	NA	0.997666	NA	8.47226	0.865853	1.17246	2.76059	1.0234	NA	2.24327	52.6524	2.83829	0	3.54144	0.00929987	11.798	17.4438	11.5693	1.75399	0	2.2023	3.07984	5.8502	28.7423	8.75819
163	69.75	27.75	124	29.1954	20.8023	37.3092	10.1613	12.0806	43.2796	178470	0.19325	0.0123988	0.205648	0.0185556	0	0	0	43.3386	NA	3.2335	31.6745	NA	NA	NA	NA	1.57689	NA	3.99892	1.85745	2.12661	0.900356	4.32787	NA	2.46094	71.2363	2.71169	0	1.70296	0.00342267	6.20533	19.5729	5.61832	1.77828	0	1.18749	1.50562	3.20598	30.8001	49.2176
164	69.75	28.25	126	28.9646	20.7621	36.9497	10.9032	1362.93	8291.21	746949	0.584662	0.0420186	0.626681	0.0406957	2.73347e-20	0	0	18.0241	0.0870107	2.06274	61.2289	0.00806939	NA	NA	NA	3.06788	NA	2.41307	3.27507	2.42801	0.877513	4.0824	NA	1.99869	77.2271	2.6491	0	1.28733	0.00558473	4.77227	21.284	8.66037	1.75866	0	1.03019	1.3616	2.3547	32.9686	44.3709
165	69.75	28.75	129	28.2938	20.1765	35.9862	24.3548	0.241935	7.55376	91828.1	0.0725956	0.0797589	0.152354	0.0253144	0	0	0	74.1096	0.0961076	0.864244	18.3521	NA	NA	NA	NA	1.23917	NA	1.04406	1.4059	0.821269	0.559746	1.48313	NA	0.63824	222.373	2.48699	0	4.03686	0.0111571	13.3913	16.5073	120.39	1.63421	0	4.15573	3.67737	12.4218	28.4541	62.7838
166	69.75	29.25	124	25.9911	18.2658	33.0281	62.5161	0	0	43725.6	0.00518215	0.0241518	0.029334	0.108966	0	0	0	52.8576	NA	1.30383	5.94695	NA	NA	NA	NA	1.24376	NA	31.9329	2.46203	1.18166	1.19575	1.28823	NA	1.12854	574.469	2.54509	4.49551e-07	7.57219	0.015458	24.955	15.1393	164.489	1.73003	0.00026973	7.58142	5.48477	23.9411	26.5052	151.651
167	69.75	29.75	122	21.3225	14.2399	27.4494	75.7419	0	0	63422.2	0.0230218	0.156978	0.18	0.147264	0	0	0	21.4314	0.0160693	1.62938	3.18161	NA	NA	NA	NA	2.13465	NA	63.583	1.92646	1.54658	1.50443	1.89835	NA	1.69608	974.63	2.71984	2.35607e-06	10.0613	0.020124	33.2206	13.1842	245.444	1.67046	0.000668124	9.34153	6.5809	30.0056	22.4452	334.363
168	69.75	30.25	120	21.0015	13.8778	27.0008	76.8065	0	0	64901.6	0.0617157	0.224078	0.285794	0.0993864	0	0	0	4.77711	NA	1.2865	2.18549	NA	NA	NA	NA	2.6627	NA	80.2789	1.67634	2.50016	1.03195	1.55562	NA	2.5862	1260.84	2.74744	1.67254e-05	10.3431	0.0346689	34.0401	14.1135	200.53	1.75898	0.00176363	8.7577	6.68812	28.0956	23.9385	806.707
169	69.75	30.75	124	20.1742	12.9945	26.1593	75.871	0.268817	7.48387	60267	0.0175194	0.207157	0.224676	0.144138	0	0	0	2.02824	NA	0.897546	0.710439	NA	NA	NA	NA	0.846852	NA	91.0948	0.627986	1.46781	0.638738	0.61243	NA	1.61871	1446.79	2.67104	6.59682e-06	11.2143	0.0415267	36.7196	13.8477	265.948	1.74395	0.00105063	9.21944	7.24672	29.482	24.453	899.869
170	69.75	31.25	134	19.7708	12.5656	25.7842	74.0645	0	0	69918.2	0.0124142	0.218394	0.230808	0.141278	0	0	0	5.99687	NA	0.829763	0.838688	NA	NA	NA	NA	4.00433	NA	79.9405	0.94125	2.17953	1.65473	0.931994	NA	3.211	1556.82	2.75196	0.000118432	12.4662	0.0371338	40.7313	13.7836	315.156	1.76036	0.00452358	10.3216	7.81866	33.0458	23.0858	960.537
171	69.75	31.75	145	18.237	11.141	24.1372	71.5161	2.81183	55.2796	52719.8	0.00243379	0.139949	0.142383	0.163941	0	0	0	40.9501	0.0337459	1.65168	1.74778	NA	NA	NA	NA	3.56868	NA	42.4665	1.61934	2.44984	1.64593	1.65815	NA	2.75454	1240.69	2.65786	0.000331826	13.7891	0.034231	44.8548	14.7765	358.915	1.83503	0.00805284	11.227	8.49915	36.0412	24.6786	637.382
172	69.75	32.25	154	18.8753	11.7402	24.7868	85.5484	13.4677	205.581	227677	0.0256925	0.194212	0.219904	0.149147	0.00338325	0	0	19.4836	1.0606	1.31234	2.05208	0.0321073	0.00803814	0.0292573	0.00802664	2.98716	0.353252	60.2775	1.90016	2.69758	2.18041	1.43428	NA	4.84607	1445.54	2.46805	7.53636e-05	14.7388	0.0289072	47.8455	11.9687	460.734	1.6505	0.00229009	10.6487	8.74741	34.2038	21.9131	528.16
173	69.75	32.75	155	14.2266	7.61212	19.6029	132.129	1.26344	24.0484	234428	0.00605093	0.397792	0.403843	0.0560245	0	0	0	2.61251	5.11116	0.362258	0.738287	0.0949912	0.0331537	0.0886721	0.0331365	5.57473	0.561957	64.0637	0.96637	5.65392	0.534911	0.382733	NA	7.47007	1790.69	2.47791	5.41599e-07	16.6595	0.0182636	53.8542	12.8813	447.485	1.79089	0.000145325	10.1561	9.36506	32.8144	23.1884	858.519
174	70.25	24.75	129	29.3565	21.0136	38.1476	7.64516	0	0	160887	0.00135666	0.191229	0.192586	0.0530036	0	0	0	4.43034	NA	2.74253	2.749	NA	NA	NA	NA	4.30997	NA	64.1219	2.71732	4.66212	0.982195	2.23987	NA	4.63323	70.2352	2.99467	0	3.54175	0.0356219	11.8911	16.417	21.0046	1.71169	0	2.38646	2.93931	6.83103	26.9285	17.9779
175	70.25	25.25	117	29.0257	20.4447	37.8898	8.51613	0	0	170592	0	0.00497077	0.00497077	0.0901734	0	0	0	2.01834	NA	1.95466	1.64727	NA	NA	NA	NA	1.91023	NA	80.6638	1.18572	2.61542	0.724607	1.54168	NA	2.66247	82.7953	3.09022	0	3.58576	0.0309828	12.091	16.7284	21.7736	1.7091	0	2.15814	2.92074	6.13131	27.5352	26.6778
176	70.25	25.75	107	28.9843	20.2683	37.8537	9.29032	0.225806	0.462366	86404.7	0	0.0066089	0.0066089	0.074423	0	0	0	11.5876	NA	1.81669	1.01985	NA	NA	NA	NA	0.893247	NA	34.4203	1.05053	1.88231	1.68023	0.931264	NA	2.21932	75.6556	3.08388	0	3.57807	0.0260603	12.1608	16.8304	18.049	1.69552	0	2.01863	2.88127	5.73629	27.9273	27.3937
177	70.25	28.25	120	28.6806	20.1504	36.8793	9.58065	12.4032	43.3065	1.01362e+06	0.441902	0.00721971	0.449121	0.0316057	0.0183796	0	0	20.5182	0.0160963	1.41954	58.0367	0.00806685	NA	NA	NA	1.53971	NA	1.82613	1.72753	1.45422	1.01227	3.11269	NA	1.29169	82.1292	2.67812	0	1.5324	0.00510593	5.57055	20.4972	5.38209	1.78161	0	1.08939	1.46386	2.65259	31.9592	62.7793
178	70.25	28.75	124	28.2794	19.916	36.3162	15.7742	1412.21	8417.08	596594	0.542546	0.0253747	0.56792	0.0392271	0	0	0	25.5275	0.0842506	1.57775	57.1052	NA	NA	NA	NA	2.84546	NA	3.04585	2.83811	1.99573	1.07996	3.068	NA	1.3754	89.9339	2.60002	0	1.47149	0.00420169	5.19668	21.1713	10.5158	1.7658	0	1.07783	1.55885	2.26868	33.0352	62.7195
179	70.25	29.25	127	28.0413	19.8611	35.702	41	0	0	334001	0.359078	0.0979664	0.457044	0.0252144	0	0	0	36.5879	0.111598	1.17668	36.4573	NA	NA	NA	NA	2.96173	NA	11.8667	3.39368	2.82062	1.05007	1.9432	NA	2.25057	160.067	2.41067	1.78888e-06	3.2639	0.00303565	10.8334	19.3469	96.3796	1.72132	0.00107333	4.50511	3.25992	13.7291	32.341	75.1654
180	70.25	29.75	130	27.2752	19.2942	34.4204	65.2903	0.182796	5.07527	199928	0.193103	0.150157	0.34326	0.0708606	0	0	0	19.1654	0.129435	1.14902	17.6586	NA	NA	NA	NA	2.61882	NA	49.7075	2.61813	2.42952	1.09111	1.71893	NA	2.37276	448.564	2.33774	9.37541e-06	7.62817	0.00917888	25.1378	15.2526	344.614	1.63167	0.00265863	8.87	5.5356	28.1585	27.8394	89.4775
181	70.25	30.25	138	24.514	17.0177	31.0151	66.0968	0	0	86390.9	0.0130268	0.237118	0.250144	0.117161	0	0	0	3.54288	0.102145	0.497784	7.70555	0.0210248	NA	NA	NA	1.34397	0.0204326	81.5646	1.1788	1.51918	0.467011	0.839715	NA	1.85994	792.986	2.45157	6.65547e-05	10.8008	0.0197996	35.4493	14.3933	360.85	1.7361	0.00701793	9.948	6.85209	31.8017	25.7828	179.625
182	70.25	30.75	142	23.8139	16.2864	30.2059	67.1613	0.731183	15.371	86915.3	0.00681665	0.235344	0.242161	0.134408	0	0	0	0.290813	0.107997	0.197591	4.31902	0.040874	0.0204421	0.0204396	0.0123713	0.733559	0.0241735	90.7818	0.721331	1.17334	0.152028	0.410675	NA	1.73656	901.912	2.47648	2.62504e-05	13.5044	0.0221673	43.9495	14.3337	384.008	1.76695	0.00418072	10.574	8.07627	33.657	24.965	244.179
183	70.25	31.25	155	23.439	15.9395	29.8291	68.2258	0.317204	8.24194	80222.7	0.0228746	0.271233	0.294108	0.117658	0	0	0	0.867225	0.148673	0.396163	3.86406	0.0656609	0.0587373	0.0458134	0.0765711	1.08448	0.0200163	88.4845	0.830996	1.34661	0.585651	0.5647	NA	2.33343	863.662	2.38782	0.000471272	15.0609	0.0225295	48.8814	14.5728	491.232	1.77544	0.0180005	11.9921	8.74857	38.257	26.1263	207.002
184	70.25	31.75	160	24.8971	17.0816	31.45	64.1613	0	0	137882	0.0136111	0.326294	0.339905	0.0931873	0	0	0	9.72315	0.110805	0.72029	4.76973	0.0548155	0.0672071	0.00925355	0.0773173	1.29808	0.0177522	77.947	1.25369	1.3817	0.659537	0.939265	0.0435661	1.70521	627.957	2.28018	0.00132042	11.4789	0.0104991	37.2813	16.3466	464.481	1.77665	0.0320443	12.6208	7.61496	40.1226	29.6256	194.568
185	70.25	32.25	166	24.1039	16.35	30.5057	69.2258	14	212.892	223807	0.0652783	0.244391	0.309669	0.109805	0	0	0	5.45283	0.0607367	0.577737	3.56453	NA	NA	0.00810547	NA	1.09233	NA	84.8166	0.934744	1.01265	0.683678	0.763518	NA	1.59198	678.367	2.37426	0.000299891	10.7486	0.0132744	34.9849	14.0566	362.024	1.67122	0.00911285	10.429	7.48629	33.037	26.2433	213.544
186	70.25	32.75	171	21.0031	13.5769	26.9767	119.226	3	32.8548	223160	0.0444765	0.272776	0.317253	0.112983	0.000645282	0	0	0.820631	0.0793568	0.294171	2.03813	NA	NA	NA	NA	0.755674	NA	91.6737	0.994486	1.13283	0.197889	0.451607	NA	2.10533	930.242	2.33332	2.15516e-06	11.3053	0.0220041	36.8293	13.9923	338.096	1.74218	0.000578287	8.55043	7.17757	27.106	26.6371	394.512
187	70.25	33.25	182	19.1098	11.8741	24.7885	144.355	12.371	165.129	143533	0.0812839	0.361359	0.442643	0.136416	0.000129007	0	0	0.0409913	0.155102	0.0693725	0.763805	NA	NA	NA	NA	0.869922	NA	57.0231	0.631637	1.48315	0.0314014	0.180095	NA	2.50407	1059.29	2.47647	8.99101e-07	13.3292	0.0276928	43.2256	12.6163	246.225	1.70511	0.000381456	8.55927	7.68073	27.3836	23.2371	532.278
188	70.25	33.75	180	14.4113	7.90233	19.5881	213.29	3.60753	66.9946	313194	0.147053	0.399904	0.546957	0.0763898	0.00281026	0	0	0.00897725	1.56321	0.0761699	2.2417	0.132109	0.0730625	NA	NA	7.20089	0.383948	33.4773	3.59686	7.06487	0.0117717	0.444633	NA	7.92171	1781.9	2.60133	2.1664e-07	19.5367	-0.00615184	63.4296	11.2663	536.472	1.55043	9.19123e-05	14.3345	10.4224	46.5644	18.7318	966.273
189	70.75	24.25	154	30.065	21.7911	38.6683	5.90323	8.75806	14.1129	40794	0.0163232	0.143352	0.159675	0.00904092	0	0	0	12.8336	NA	3.65911	4.09956	NA	NA	NA	NA	3.45755	NA	15.9413	4.00123	3.41666	1.85694	2.55314	NA	2.81519	28.9861	2.70874	0	2.52212	0.0124363	8.69056	18.5359	27.305	1.76381	0	2.88814	2.40083	8.81663	29.8178	-18.7867
190	70.75	24.75	126	29.5974	21.1525	38.1722	9.93548	0.204301	0.403226	130497	0.00347935	0.321045	0.324524	0.018324	0	0	0	6.44497	NA	8.97625	7.0428	NA	NA	NA	NA	7.36	NA	28.0672	5.17267	6.70791	2.69419	4.80786	NA	6.34519	70.4284	2.83132	0	3.0335	0.0240383	10.3937	16.3341	28.9725	1.69389	0	2.30355	2.54964	6.77793	26.7682	1.65934
191	70.75	25.25	113	29.1993	20.6332	37.7596	11.2581	0	0	164983	0.000905144	0.0928684	0.0937736	0.0660551	0	0	0	2.00524	NA	5.89435	5.05188	NA	NA	NA	NA	3.77072	NA	28.2335	3.09924	4.95855	1.42568	3.27798	NA	5.01102	121.734	2.92511	0	3.31238	-0.0103073	11.1248	16.055	19.0304	1.67695	0	2.13239	2.6883	6.10276	27.3822	77.199
192	70.75	27.75	91	28.6237	19.9203	36.9065	8.54839	0	0	45747.4	0.000284313	0.0534	0.0536844	0.00797707	0	0	0	47.0255	NA	0.383781	0.118655	NA	NA	NA	NA	0.0666854	NA	0.382431	0.112297	0.289568	0.182634	0.0765415	NA	0.0854063	116.255	2.73019	0	3.0093	0.00639045	10.6595	15.9621	16.8717	1.70642	0	2.10654	2.18991	6.43768	26.1887	75.41
193	70.75	28.25	105	28.3399	19.651	36.7051	9.19355	1.51075	5.48387	124925	0.0435942	0.0235362	0.0671304	0.0419209	0	0	0	73.7416	NA	0.553003	13.498	NA	NA	NA	NA	0.506815	NA	0.28468	0.545953	0.367849	0.657716	0.996776	NA	0.163715	96.1951	2.72161	0	2.00939	0.00142431	7.11585	18.8795	8.9617	1.7777	0	1.31202	1.74426	3.45669	29.9731	70.4098
194	70.75	28.75	125	27.9007	19.3482	36.2315	12.2258	10.9301	38.7151	919617	0.582987	0.0043284	0.587315	0.0405873	0.00596563	0	0	25.0929	0.0482306	1.22166	67.231	NA	NA	NA	NA	1.23582	NA	0.454759	1.12069	0.809265	0.929225	2.0346	NA	0.37827	91.9645	2.65567	0	1.39966	0.0037726	5.05623	21.0254	4.22629	1.78386	0	1.00343	1.44581	2.14356	32.4848	66.7875
195	70.75	29.25	128	27.9627	19.7028	35.8669	23.1935	1469.03	8555.1	838806	0.591298	0.0382176	0.629516	0.0427321	0	0	0	2.75323	0.155999	0.922662	80.1544	NA	NA	NA	NA	3.6574	NA	3.26837	3.11583	2.66142	0.492721	1.69494	NA	1.6794	99.1986	2.60264	0	1.07178	0.0053519	4.12955	22.3785	4.14906	1.76894	0	0.935205	1.22509	1.93586	33.996	70.069
196	70.75	29.75	130	27.8635	19.7453	35.3882	42.2581	602.995	5102.13	1.1671e+06	0.609186	0.0290433	0.63823	0.0429066	0.00407007	0	0	0.682251	0.0911381	0.618599	78.8082	0.00805074	NA	NA	NA	3.50994	0.0152072	6.44618	2.96366	2.78225	0.358736	2.10133	NA	2.16339	115.271	2.52218	0	1.07255	0.00484532	4.14771	21.9288	13.8465	1.74147	0	0.985229	1.24203	2.15866	34.1421	84.534
197	70.75	30.25	138	27.4982	19.4745	34.6907	44	628.801	5220.16	950793	0.547528	0.0392128	0.586741	0.0356617	0.0144537	0	0	3.34714	0.103568	0.957339	55.1791	0.0269888	0.0160708	0.0160697	0.00803555	3.47005	0.0210686	22.7545	4.28461	3.55569	0.644831	2.34399	0.0160687	3.81659	172.985	2.41041	0	2.88575	0.0102335	9.79487	20.3883	84.1384	1.72414	0	4.44667	3.09984	13.4216	33.4556	95.7016
198	70.75	30.75	138	27.1776	19.2012	34.1657	41.9677	661.914	5335.09	624561	0.541865	0.0178471	0.559712	0.0389955	0.00542055	0	0	1.25153	0.0983896	0.940746	37.7693	0.0447922	0.0224153	0.0224121	0.014347	3.21951	0.0241461	40.397	4.89071	3.52738	0.460206	2.13522	NA	5.73575	191.601	2.34999	0	2.99172	0.00727906	10.1263	20.9669	85.1303	1.74838	0	5.25583	3.48931	16.0299	34.2896	115.659
199	70.75	31.25	141	26.6083	18.6863	33.4992	58.3871	687.909	5427.98	341046	0.526725	0.0271674	0.553892	0.0354886	0	0	0	2.87485	0.217419	0.668457	31.4215	0.0735453	0.0745555	0.0557016	0.104296	3.29745	0.0493871	47.0109	3.71809	3.18396	1.30535	1.11154	0.0563529	5.36615	180.104	2.44909	0	1.80209	0.00437903	6.28639	21.6788	35.9843	1.78814	0	2.08674	2.0384	5.64764	34.474	122.274
200	70.75	31.75	144	26.0171	18.0816	32.8047	60.8387	711.522	5493.24	496322	0.376131	0.150876	0.527007	0.0244148	0.00785008	0	0	24.0233	0.150402	1.12032	29.4982	0.0392786	0.0549797	0.0173	0.046311	3.10331	0.0312324	30.3143	2.72203	2.62962	1.07119	2.58462	0.0353323	3.10512	188.749	2.52594	0	1.27913	0.00275107	4.69637	21.435	16.5268	1.76945	0	1.07578	1.42861	2.31917	33.8285	134.574
201	70.75	32.25	162	24.6293	16.8055	31.1454	66.3226	0	0	277989	0.0738342	0.306321	0.380155	0.0558895	0	0	0	16.18	0.139089	0.961302	9.06413	0.038009	0.0551047	0.0131592	0.0436367	1.61619	0.0282273	64.115	1.45109	1.62095	1.6309	1.28504	0.0922208	2.43909	298.944	2.63155	0	3.44691	0.00570639	11.6853	19.6553	107.302	1.78083	0	5.97368	3.91407	18.5207	31.2769	174.12
202	70.75	32.75	167	24.403	16.5301	30.7129	88.3226	21.4839	254.634	886266	0.339183	0.108296	0.447479	0.0552825	0.00532772	0	0	2.85548	0.307055	0.586388	8.54153	0.0191627	0.025355	0.0185027	0.0147762	2.02895	0.0473167	73.501	3.30817	2.1157	0.800884	1.43898	0.0846173	5.02204	366.865	2.42108	0	3.5746	0.00624795	12.1409	17.4731	122.73	1.66915	0	6.03974	3.82296	18.9205	30.5154	224.051
203	70.75	33.25	184	20.8801	13.4616	26.6638	122.742	14.7473	186.71	396477	0.125921	0.348972	0.474893	0.0671263	0.00120024	0	0	0.108524	1.06347	0.273739	4.36778	0.0179452	0.0233473	0.0179424	0.0125401	3.07311	0.0178514	77.5719	2.91362	3.97348	0.157286	0.774359	NA	6.2699	814.615	2.55449	3.57775e-06	11.3907	0.0252004	36.6716	13.6017	250.475	1.70244	0.00151791	10.411	7.32381	32.6071	23.5376	367.445
204	70.75	33.75	199	13.6169	7.21621	18.5545	122.194	0	0	315310	0.0110355	0.44491	0.455945	0.0232353	0	0	0	NA	5.27301	0.122214	3.35105	0.476053	0.402697	0.0295262	0.032176	13.2173	1.56428	34.2403	6.67309	7.42178	NA	0.595422	NA	8.34054	1706.41	2.52368	8.62064e-07	23.1511	0.0206004	74.7449	11.7625	411.947	1.72159	0.000365742	13.2336	11.7132	42.8075	20.084	892.065
205	71.25	28.25	95	28.4286	19.7418	36.6363	8.51613	1.31183	5.22043	51838.6	0	0.0119338	0.0119338	0.00952503	0	0	0	88.7465	NA	0.534801	0.20704	NA	NA	NA	NA	0.308486	NA	0.940711	0.191557	0.447189	0.324666	0.453963	NA	0.188278	107.301	2.75038	0	1.99722	0.00185244	7.17007	18.4886	8.0804	1.76091	0	1.32216	1.68594	3.74794	29.6676	79.199
206	71.25	28.75	117	28.0166	19.4912	36.1419	14.2258	11.2043	39.1774	79771.6	0.0504749	0.0407597	0.0912346	0.00515657	0	0	0	77.1441	NA	1.43609	16.6454	NA	NA	NA	NA	0.887499	NA	0.438356	0.945619	0.47837	0.951824	1.39049	NA	0.229028	102.262	2.68275	0	1.2667	0.00160185	4.76342	20.962	5.00424	1.78377	0	0.980737	1.3022	2.20741	32.2828	74.673
207	71.25	29.25	125	27.985	19.6967	35.947	20.2903	852.796	4283.82	872933	0.648529	0.0011817	0.649711	0.0409753	0.00677279	0	0	14.6654	NA	1.25913	78.3242	NA	NA	NA	NA	1.21543	NA	0.579103	1.22374	0.78254	0.525533	1.60569	NA	0.361326	105.592	2.64062	0	1.03017	0.00547356	4.02927	21.9507	4.05736	1.78248	0	0.89738	1.16766	1.85037	33.3174	75.3072
208	71.25	29.75	129	27.6785	19.579	35.3333	29.7419	596.457	2838.19	1.19095e+06	0.675667	2.19188e-09	0.675667	0.0444045	0.00467366	0	0	0.362533	0.0233044	0.257686	90.3041	NA	NA	NA	NA	1.51613	0.00804873	2.35893	1.67422	1.44672	0.0793082	1.57639	NA	0.943573	112.966	2.62803	0	1.12625	0.00554937	4.2708	21.4847	4.04073	1.7755	0	0.908863	1.23969	1.85512	32.9527	84.3181
209	71.25	30.25	133	27.3835	19.3974	34.7695	35.8387	628.306	2914.41	1.73273e+06	0.487738	0.0339279	0.521666	0.052153	0.0426871	0	0	0.0918667	0.0250174	0.354709	57.2687	NA	NA	NA	NA	3.0658	NA	24.5554	4.16331	3.46228	0.0619168	3.77366	NA	3.71955	125.361	2.61324	0	1.4583	0.00574468	5.18087	20.4635	5.18214	1.77405	0	1.02667	1.517	2.12679	31.8743	100.1
210	71.25	30.75	138	27.2239	19.3012	34.4466	36.9032	0	0.268817	418109	0.456942	0.0695246	0.526466	0.0534487	0	0	0	1.40126	0.0784182	0.589145	49.4662	NA	NA	0.0123653	NA	3.74713	NA	25.4537	7.04368	3.89789	0.405361	1.42737	NA	7.02907	140.743	2.61608	0	1.35636	0.00579975	4.88315	20.5023	5.16732	1.77396	0	0.980481	1.42549	2.0092	31.9354	121.443
211	71.25	31.25	138	26.5346	18.6874	33.5398	53.0323	0	0	419987	0.355279	0.0879874	0.443266	0.0450593	0	0	0	0.838175	0.0315208	0.306421	40.9644	NA	NA	NA	NA	2.98361	NA	43.0994	4.11091	2.72298	0.542516	0.441355	NA	4.51048	157.133	2.64293	0	1.09029	0.00791282	4.18206	21.1097	5.34779	1.7796	0	0.860345	1.18264	1.71211	32.6038	137.882
212	71.25	31.75	144	26.0572	18.2062	32.947	64.5161	690.188	5441.88	493947	0.434604	0.0191349	0.453739	0.051802	0.00366155	0	0	0.264813	0.0521966	0.315242	32.3699	0.0241105	0.0482278	0.00804252	0.0160966	2.93743	0.0401948	55.8446	2.5735	2.42675	0.164669	0.661036	0.0241083	2.81968	174.051	2.67983	0	1.08451	0.0100439	4.18634	21.859	6.62074	1.77772	0	0.875182	1.18337	1.80923	33.4849	145.647
213	71.25	32.25	148	25.3489	17.5148	31.9606	73.3548	725.731	5547.01	395999	0.382041	0.0821936	0.464235	0.0634373	0.001506	0	0	0.174961	0.141546	0.377852	31.125	0.0786588	0.0993747	0.049987	0.130203	2.88894	0.056989	55.6651	2.48587	2.68338	0.188304	0.730355	0.538259	3.16591	287.597	2.7055	0	4.09385	0.0111676	13.7692	21.135	125.342	1.83715	0	6.0754	4.02643	19.0753	32.4846	153.101
214	71.25	32.75	160	24.8688	17.0714	31.2314	84.3226	760.333	5597.33	338212	0.227346	0.204745	0.432091	0.0499805	0	0	0	0.122163	0.124059	0.327191	17.1701	0.0430909	0.0372523	0.0420973	0.06868	2.14385	0.0389616	71.0014	2.66567	2.13426	0.20051	0.573905	0.646604	3.71709	384.356	2.75399	0	6.20618	0.00783562	20.3953	17.2611	201.76	1.69115	0	9.68459	5.98687	30.5972	27.6025	179.259
215	71.25	33.25	180	21.675	14.231	27.4997	114.258	0	0	281447	0.0508303	0.405041	0.455872	0.0578488	0	0	0	0.110831	1.21947	0.345216	7.98868	0.032408	0.0204661	0.0383544	0.0494356	3.62215	0.0341013	71.7246	3.27855	4.73704	0.205481	1.00072	NA	6.53303	641.464	2.61461	0	10.1641	0.0326331	32.4842	15.1753	205.313	1.80929	0	10.1711	6.97233	31.3608	26.2106	334.145
216	71.25	33.75	201	19.615	12.412	25.2093	145.677	1.97849	24.8118	876804	0.0952512	0.429436	0.524687	0.0266644	0.0205853	0	0	NA	3.3712	0.409005	5.58964	0.0321889	0.016095	0.00806079	NA	8.43619	0.209494	56.4752	3.59351	8.26989	NA	2.48385	NA	9.65349	1025.77	2.38914	0	18.2399	0.0328621	58.8686	14.2123	353.751	1.82897	0	13.7076	10.0066	43.7712	25.7042	348.674
217	71.25	34.25	198	20.963	13.4172	26.6842	171.871	168.253	2451.94	631339	0.0668904	0.31565	0.382541	0.172614	0.00739591	0	0	0.128589	0.99786	0.294772	6.96754	0.0446802	NA	0.00804326	0.00802494	9.07588	0.0714232	38.5031	1.56577	9.22866	0.0482232	1.20067	NA	11.0072	881.629	2.4672	0	17.9872	0.0319679	58.5017	13.5169	320.683	1.76742	0	14.1548	10.0041	45.7242	24.3625	330.331
218	71.25	34.75	203	16.2865	9.2325	21.7538	225.516	51.7419	860.226	503217	0.134845	0.335843	0.470688	0.0681876	0.00955448	0	0	NA	0.335738	0.097709	2.95277	0.0594341	NA	NA	0.00806807	7.08476	0.085662	18.6837	2.7309	5.24001	NA	0.345971	NA	6.03436	1170.47	2.2696	0	18.9143	-0.0124021	62.0844	10.6091	362.884	1.56935	0	14.3654	9.5002	46.739	21.0775	589.627
219	71.75	28.25	88	28.8782	20.2173	36.8489	9.67742	1.8172	5.1129	46479.1	0	0.0655325	0.0655325	1.65458e-23	0	0	0	82.0125	NA	0.233037	0.0751783	NA	NA	NA	NA	0.111156	NA	0.432291	0.0961198	0.76042	0.138365	0.113444	NA	0.0894925	113.66	2.76639	0	2.0007	0.00141532	7.05919	18.2941	6.51973	1.75273	0	1.25148	1.7553	3.3554	29.2926	92.6655
220	71.75	28.75	103	28.4075	19.9183	36.3787	19.2258	11.3978	38.586	45084.3	0.0173383	0.0101724	0.0275107	0.000544117	0	0	0	87.2344	NA	0.943631	6.2994	NA	NA	NA	NA	0.674248	NA	0.805177	0.503676	0.526084	0.543239	0.868608	NA	0.19499	114.05	2.68782	0	1.57064	0.000688455	5.61934	20.2293	5.02804	1.78168	0	1.10608	1.56654	2.50776	31.6139	88.7842
221	71.75	29.25	124	27.9706	19.7477	35.8383	23.2903	257.156	1770.51	814011	0.495265	0.00813183	0.503397	0.0273192	0.0144363	0	0	30.5616	0.0193485	3.05728	56.5491	NA	NA	NA	NA	1.38286	NA	1.60339	1.50879	0.763003	1.24476	3.19769	NA	0.482539	117.644	2.6605	0	1.18016	0.00375196	4.45204	21.538	4.70668	1.79601	0	0.951054	1.28504	1.98752	32.8297	95.1024
222	71.75	29.75	124	27.7105	19.6327	35.4229	28.0645	0	0	1.27286e+06	0.702503	2.02715e-06	0.702505	0.0488197	0.00573611	0	0	3.4615	0.0160941	0.689472	93.1747	NA	NA	NA	NA	0.379721	NA	0.330363	0.475537	0.190918	0.266412	1.46382	NA	0.1069	121.11	2.6492	0	1.07919	0.00408992	4.12318	21.5283	4.21073	1.78438	0	0.849369	1.18101	1.6479	32.7938	100.352
223	71.75	30.25	132	27.5112	19.5174	35.0072	35.3548	0	0	1.57873e+06	0.667092	0.0108204	0.677912	0.0469279	0.0187774	0	0	0.196487	0.0297262	0.337225	87.8352	NA	NA	0.00803177	NA	0.913998	NA	3.85976	1.74515	1.13923	0.121738	3.2957	NA	1.06933	129.094	2.64516	0	1.25231	0.00374902	4.61318	21.1321	4.42643	1.78279	0	0.985954	1.36331	2.06572	32.4361	103.144
224	71.75	30.75	135	27.2471	19.3456	34.5436	36.6452	665.011	2987.83	524696	0.413668	0.0222161	0.435884	0.0507785	0	0	0	8.44576	0.0905314	2.38783	44.8432	0.0080619	0.00886663	0.0148002	NA	1.97694	0.0161169	28.2956	3.04955	3.48007	1.96488	2.05374	NA	3.91677	140.786	2.62899	0	1.34858	0.00854129	4.9272	20.6115	5.76683	1.77376	0	1.0686	1.44885	2.34374	31.9378	114.886
225	71.75	31.25	139	26.6718	18.8765	33.7816	45.4839	0.33871	10.6129	124000	0.0227613	0.0335943	0.0563557	0.00513811	0	0	0	6.15075	0.118158	1.60961	12.8874	0.0121619	0.00890685	0.0181855	0.063709	5.35016	0.017814	59.1569	2.27652	2.67112	3.40447	1.53647	NA	5.42549	158.01	2.62353	0	1.34812	0.0119151	4.93418	20.4439	6.62371	1.78103	0	1.01206	1.417	2.17902	31.8829	130.809
226	71.75	31.75	141	26.2511	18.4307	33.1482	71.0323	0.139785	4.56452	139783	0.0395971	0.121083	0.16068	0.0273373	0	0	0	1.45821	0.146435	0.440558	5.85563	NA	NA	NA	NA	1.79409	NA	85.5896	0.995785	1.04291	0.903493	0.636498	NA	1.81286	177.355	2.64619	0	1.18911	0.00920538	4.44232	20.9921	6.46317	1.78526	0	0.858827	1.24656	1.70188	32.6904	154.134
227	71.75	32.25	149	25.9263	18.0865	32.6367	83	0	0	475556	0.378967	0.149129	0.528097	0.0525412	0	0	0	0.124474	0.0771042	0.275744	32.495	0.0401874	0.032144	0.0152605	0.0964462	2.57495	0.0321455	53.9479	3.2228	2.59849	0.285572	1.3212	0.225046	3.54507	236.521	2.66198	0	2.36745	0.00789783	8.22791	20.6766	105.69	1.75025	0	4.14465	2.54717	12.9696	32.184	165.923
228	71.75	32.75	162	24.8863	17.1732	31.3214	86.3548	727.43	5481.4	461899	0.27424	0.206421	0.48066	0.0535913	0.0061817	0	0	0.0709909	0.126071	0.29102	21.176	0.0339672	0.051093	0.0683553	0.0651055	2.59759	0.0448208	63.6112	3.83328	2.79062	0.0224939	0.87235	0.168694	4.76915	343.646	2.68452	0	5.34313	0.00527226	17.6911	18.7534	149.56	1.80371	0	7.40181	4.79637	23.4087	29.6997	187.133
229	71.75	33.25	165	23.5791	15.9695	29.6927	123.935	737.774	5481.28	191212	0.0552089	0.342505	0.397714	0.0746454	0	0	0	NA	0.203319	0.312873	6.50902	NA	NA	NA	NA	2.16374	NA	80.5338	2.1657	3.31678	NA	0.619797	NA	4.62684	430.287	2.64225	0	7.32398	0.0183802	23.6629	16.4306	140.922	1.816	0	7.09429	5.56622	21.933	27.6095	209.06
230	71.75	33.75	176	22.7423	15.1652	28.6995	150.129	676.957	5370.87	943274	0.180168	0.337401	0.517569	0.0378952	0.011898	0	0	NA	1.41953	1.09918	18.7052	NA	NA	NA	NA	6.61142	NA	48.3656	4.26783	6.75404	NA	6.70501	NA	6.61574	513.488	2.54981	0	8.87722	0.0183272	28.7782	19.0636	219.698	1.95051	0	11.0197	6.62797	34.8565	31.0739	255.399
231	71.75	34.25	193	23.1306	15.3684	29.1167	163.355	363.64	3161.3	2.47563e+06	0.523966	0.0635265	0.587493	0.0447903	0.0577698	0	0	NA	1.81751	0.972421	48.4508	NA	NA	NA	NA	6.702	NA	20.6207	4.1493	6.29454	NA	5.80563	NA	5.728	546.965	2.56167	2.6973e-06	10.6091	0.0124515	34.749	15.5271	280.443	1.70836	0.000660697	13.7064	7.49243	44.1764	26.6257	276.064
232	71.75	34.75	216	16.6506	9.35282	22.3752	282.194	106.602	728.72	939603	0.336647	0.203584	0.540231	0.0232014	0.0067757	0	0	NA	1.99351	0.689541	21.9316	0.183399	0.0933311	NA	0.0112671	14.4186	0.606126	20.3577	11.8665	10.4359	NA	3.22636	NA	10.6715	1152.26	2.6137	1.09947e-06	19.9421	0.00906216	65.2104	12.2792	443.919	1.69459	0.000428926	13.8807	10.0017	45.2594	20.5441	494.945
233	71.75	35.25	211	9.79133	3.81281	14.5134	382.129	0.844086	257.726	298636	0.053363	0.211575	0.264938	0.0511615	0	0	0	0.153713	3.1911	0.330659	6.32511	1.43596	1.17569	0.893139	1.84328	18.2024	1.59744	11.5321	7.19261	9.43924	0.1268	0.986069	0.0474829	9.44014	2318.39	2.62818	7.5574e-05	35.7886	-0.0117152	116.696	11.3118	696.287	1.75551	0.00641871	13.1695	14.9062	43.9859	17.4805	965.07
234	71.75	35.75	198	6.43638	0.94945	10.962	234.645	2.44624	421.511	110052	0.0321532	0.111748	0.143901	0.106502	0	0	0	14.4073	1.99611	3.26644	4.44519	0.93363	0.88645	0.558147	1.0147	21.3638	1.05729	6.08137	6.91775	8.41948	5.47323	2.85095	0.0645035	8.31763	3161.36	2.62356	0.00234601	41.7091	0.00526555	136.657	10.9909	848.138	1.79696	0.0421933	15.938	16.2071	52.4904	17.3457	1286.29
235	71.75	36.25	183	1.48796	-3.6471	5.67955	149.871	0	0	29627.3	0.00114612	0.0226207	0.0237668	0.12676	0	0	0	32.855	0.462647	2.70349	2.51136	0.239452	0.277793	0.238133	0.221821	6.25565	0.265031	1.23781	3.91223	1.87553	14.564	2.25407	0.0935919	1.86777	4158.98	2.64358	0.0104803	43.2149	0.0248431	141.612	10.9922	912.143	1.77875	0.0983889	21.3005	16.5209	68.7741	17.1367	1988.11
236	72.25	28.75	95	28.7056	20.2663	36.4736	21.6774	9.04839	32.5538	38771.5	0.0103211	0.0162329	0.026554	8.77933e-05	0	0	0	75.2728	NA	0.119344	0.142449	NA	NA	NA	NA	0.141706	NA	0.211591	0.109888	0.064334	0.123396	0.148974	NA	0.0448932	124.83	2.66943	0	1.9608	-0.00202563	6.63305	19.722	5.6859	1.79118	0	1.1481	1.87591	2.43423	31.1341	98.2092
237	72.25	29.25	118	28.2054	19.9161	35.947	22.2903	0	0.591398	121114	0.0562508	0.0453598	0.101611	0.00332736	0	0	0	74.5052	0.0467463	1.18836	13.6496	NA	NA	NA	NA	1.53284	NA	2.08551	1.55911	0.931916	0.678854	1.00189	NA	0.633007	130.743	2.65748	0	1.66686	6.9843e-05	5.76106	20.535	5.25141	1.79804	0	1.15295	1.7172	2.42158	31.9381	106.746
238	72.25	29.75	127	27.7518	19.6465	35.3422	26.4194	270.634	1863.55	912495	0.605662	0.00880155	0.614464	0.0417317	0.00272903	0	0	14.5031	0.0146322	0.512832	81.3488	NA	NA	NA	NA	0.747014	NA	0.503282	0.767422	0.430028	0.249067	1.28055	NA	0.186876	132.773	2.65048	0	1.02672	0.00457885	4.02179	21.9702	4.41657	1.7853	0	0.900384	1.17192	1.82484	33.252	108.648
239	72.25	30.25	131	27.6601	19.6362	35.1271	35.7742	0	0	1.25055e+06	0.695276	2.23823e-06	0.695278	0.0480798	0.0088954	0	0	0.329125	0.00809187	0.0941897	97.3289	NA	NA	NA	NA	0.268955	NA	0.0361462	0.756207	0.14346	0.0714356	1.38189	NA	0.131722	140.247	2.65111	0	0.854052	0.00546615	3.57722	22.3765	5.14622	1.77751	0	0.868659	1.04352	1.79516	33.5577	115.867
240	72.25	30.75	134	27.4256	19.4822	34.7075	36.9677	65.5269	456.785	1.14312e+06	0.66999	2.23537e-09	0.66999	0.0455597	0.00326126	0	0	0.0159542	0.0734435	0.0639193	86.3292	NA	0.0160946	0.0160782	0.00804766	1.31237	NA	3.95456	3.04655	1.37228	0.0418337	2.06068	NA	2.25634	146.081	2.66781	0	0.98988	0.00436654	3.91935	21.8803	5.14736	1.78616	0	0.891192	1.14331	1.81781	33.1127	121.155
241	72.25	31.25	138	26.8742	19.0397	33.9929	46.6129	566.559	2770.47	969730	0.59483	0.00520802	0.600038	0.0308436	0.0132434	0	0	1.02114	0.216145	0.563195	68.7162	0.0444337	0.0153391	0.0331833	0.0861026	2.51921	0.0321826	15.6426	3.29064	1.9844	0.453589	2.54726	0.0516955	3.35396	157.435	2.66911	0	1.29083	0.00655766	4.72062	21.0917	6.70702	1.79216	0	0.982018	1.38592	2.03876	32.5399	128.3
242	72.25	31.75	141	26.562	18.7689	33.5149	75.2903	300.349	1703.82	514360	0.438061	0.0731816	0.511243	0.0322711	0	0	0	0.283193	0.0892695	0.440731	48.2735	0.0446708	0.0154086	0.0373514	0.103878	1.62201	NA	43.6671	1.56348	1.45696	0.136842	1.29844	0.0519713	1.66036	173.218	2.66009	0	1.3433	0.00686508	4.86427	20.9413	8.36534	1.78943	0	1.11954	1.44565	2.56923	32.577	143.502
243	72.25	32.25	153	25.997	18.2433	32.7536	86.2258	311.409	1741.93	593483	0.470678	0.093627	0.564305	0.0516774	0.00387267	0	0	0.0665818	0.116544	0.923909	58.6091	NA	NA	0.00802924	NA	2.71967	NA	26.4829	3.59185	2.45326	0.0147725	2.43283	NA	3.18118	307.488	2.63633	0	3.78596	0.00963337	12.766	18.9173	195.843	1.73271	0	5.75892	3.46929	18.0322	30.5632	158.239
244	72.25	32.75	157	23.9344	16.4236	30.3134	90.9032	0	0	329475	0.032686	0.465349	0.498035	0.036543	0	0	0	NA	0.0932978	0.518036	20.9645	NA	NA	NA	NA	3.22972	NA	61.1741	4.51924	3.0046	NA	1.3106	NA	5.72679	464.297	2.79894	0	4.28463	0.00108493	14.41	19.4315	160.577	1.92645	0	4.89816	3.59359	15.0154	29.43	212.552
245	72.25	33.25	165	24.7662	17.0639	31.258	133.484	25.4624	228.876	332569	0.119284	0.347539	0.466822	0.034879	0	0	0	NA	0.0377293	0.332808	9.62619	NA	NA	NA	NA	3.62407	NA	70.5925	4.54349	4.301	NA	0.811115	NA	6.67278	403.83	2.7712	0	3.69063	0.00216202	12.4482	17.1122	72.3726	1.80672	0	3.21698	3.09345	9.46428	27.0516	229.86
246	72.25	33.75	175	23.6172	16.0211	29.9608	148.452	687.833	5388.07	717487	0.217044	0.323284	0.540328	0.0362822	0.00729052	0	0	NA	0.657303	1.14302	23.1524	0.0633976	NA	NA	NA	9.26365	0.0374082	36.9685	6.59694	9.30709	NA	5.27895	NA	8.12306	409.397	2.67623	0	6.86379	0.0114887	22.076	17.1566	123.929	1.82612	0	7.63535	5.63928	23.6357	28.0321	238.772
247	72.25	34.25	205	22.4775	14.8354	28.6901	187.484	676.134	5376.42	1.87724e+06	0.498162	0.111973	0.610135	0.0341729	0.0359755	0	0	NA	0.673585	1.83831	58.6571	0.275126	0.329166	0.184179	0.2041	6.20598	0.168546	8.0723	6.17173	5.04374	NA	9.94693	1.3856	3.45042	564.832	2.74497	1.52288e-05	12.1959	0.0150436	39.7589	15.8955	297.001	1.72279	0.00348203	14.3454	8.03879	46.3765	26.1153	274.484
248	72.25	34.75	227	15.8638	8.91391	21.4385	311.516	26.4409	307.785	1.20355e+06	0.33408	0.128364	0.462443	0.0133075	0.0185934	0	0	NA	2.73689	2.62605	36.3269	0.54455	0.380571	0.0991597	0.122264	11.4215	1.74848	9.56756	12.7307	6.73992	NA	8.83996	1.12151	6.75846	1319.67	2.7042	1.75961e-05	23.1685	0.00868114	75.7039	12.4533	485.312	1.72066	0.00331384	14.1806	11.0532	46.5044	19.7711	524.397
249	72.25	35.25	212	7.78704	2.19412	12.2664	359.258	0.0107527	170.812	370929	0.0659276	0.101003	0.16693	0.043713	0	0	0	1.84438	4.44891	2.04897	10.0758	2.79475	2.27525	1.65283	4.28525	25.3524	3.20373	8.64224	9.59518	11.0305	1.21131	3.09073	0.0466467	9.52823	2719.94	2.66669	0.000970466	36.0488	0.0263066	117.986	11.2639	754.469	1.75741	0.0237441	14.2201	14.8991	47.122	17.0374	995.336
250	72.25	35.75	189	3.29403	-1.88747	7.55993	250.774	0	0	56155.2	0.00100961	0.0233453	0.0243549	0.102875	0	0	0	22.5477	1.37554	5.39189	5.95009	0.908776	0.926677	0.535748	1.1643	23.607	0.985267	2.38429	9.64369	4.61873	12.2551	4.49501	0.14053	3.61322	3848.95	2.74373	0.00582792	42.3165	0.037375	139.101	11.3881	793.825	1.79738	0.0721758	19.6433	17.587	63.7636	17.1544	1607.24
251	72.25	36.25	174	4.03917	-1.34253	8.43272	166.774	0	179.425	85668.8	0.0124971	0.0340401	0.0465372	0.150528	0	0	0	46.1861	0.397564	4.55936	4.41953	0.326148	0.467022	0.493694	0.33412	11.1699	0.230752	0.912319	7.32854	1.99337	14.7276	3.99169	0.44959	1.92232	3988.47	2.6387	0.0125685	42.2146	0.0535553	138.397	10.8949	975.734	1.79083	0.108537	22.5254	16.6927	72.7005	17.535	1820.8
252	72.25	36.75	178	-1.97999	-7.14773	2.1785	84.1935	0	159.473	13674.2	0.00079301	0.00373107	0.00452409	0.27397	0.000214201	0	0	19.6644	0.106378	1.07739	0.968328	0.0877703	0.123721	0.147918	0.200484	1.91024	0.0604759	0.207534	1.58887	0.390191	8.5662	0.970309	0.243296	0.386518	4556.13	2.4523	0.00707039	41.4187	-0.000125761	135.317	9.84405	784.663	1.65318	0.0805826	22.745	15.3278	73.2652	17.4026	2585.9
253	72.75	29.25	111	28.3987	20.1312	36.0066	21.5161	0	0	374804	0.187095	0.0955403	0.282636	0.0127698	0	0	0	42.2452	NA	3.10788	24.8249	NA	NA	NA	NA	2.71626	NA	1.72167	2.7712	1.49433	1.35944	2.60994	NA	0.876656	142.982	2.64399	0	1.7233	0.00075966	5.8844	20.7095	4.69853	1.79287	0	1.24299	1.81366	2.62157	32.1029	115.559
254	72.75	29.75	126	27.9048	19.7467	35.4467	26.2581	280.398	1933.51	839983	0.618959	0.0087119	0.627671	0.0384704	0.00618048	0	0	11.9144	0.00804096	1.98639	76.1412	NA	NA	NA	NA	1.61523	NA	0.579789	1.70301	0.896176	0.769157	2.25147	NA	0.351154	144.803	2.6561	0	1.06857	0.00498898	4.15783	22.2819	4.50368	1.79311	0	1.02174	1.26892	2.20439	33.5056	111.177
255	72.75	30.25	131	27.8522	19.7721	35.2697	33.6774	0	0	1.1824e+06	0.698588	2.0144e-06	0.69859	0.0470742	0.00413267	0	0	0.843623	0.00808137	0.311048	95.95	NA	NA	NA	NA	0.302077	NA	0.0838551	0.394936	0.185574	0.115546	2.01393	NA	0.074232	150.85	2.63995	0	0.805061	0.00471833	3.44262	22.4438	5.78043	1.77108	0	0.780649	0.961316	1.51331	33.7571	129.178
256	72.75	30.75	134	27.529	19.5383	34.7488	39.4839	67.4731	473.516	1.27691e+06	0.695389	3.48096e-09	0.695389	0.0495484	0.00800313	0	0	0.0144193	0.0110032	0.0443809	95.5012	NA	NA	NA	NA	0.458671	NA	0.414693	0.789163	0.337478	0.0144199	2.47404	NA	0.488312	160.402	2.66256	0	0.92533	0.00293334	3.73715	21.8979	5.85598	1.78415	0	0.79582	1.04649	1.53012	33.1679	134.462
257	72.75	31.25	136	26.9734	19.1459	34.008	48.6129	0	0.166667	1.39848e+06	0.690659	2.8927e-06	0.690662	0.0413523	0.0096737	0	0	NA	0.0629495	0.15955	93.5648	0.00803249	0.00803213	0.00802928	0.0160625	0.512545	NA	0.742222	0.883197	0.477153	0.00975756	3.52286	0.00803178	0.571106	168.873	2.69984	0	1.1019	0.00270079	4.1837	21.4244	6.1163	1.79952	0	0.847022	1.19547	1.6379	32.6869	143.794
258	72.75	31.75	141	26.6718	18.9252	33.5756	67.8065	242	1519.8	1.07735e+06	0.667979	2.7458e-09	0.667979	0.0464074	0.00749395	0	0	0.00805987	0.160167	0.633233	86.9824	NA	NA	NA	NA	1.23498	NA	4.46047	1.05405	1.17064	0.00880031	3.81642	NA	1.00803	178.646	2.69401	0	1.42858	0.00256791	5.11046	20.8078	7.89361	1.79118	0	1.66068	1.65813	4.49202	32.1292	148.752
259	72.75	32.25	152	26.3407	18.5796	33.1388	82.871	322.419	1776.84	1.35499e+06	0.636112	0.0062406	0.642352	0.0461928	0.0250232	0	0	0.00810372	0.0946688	0.597833	73.9214	NA	NA	NA	NA	2.07828	NA	13.3359	2.47893	1.69718	0.00884616	3.63532	NA	2.701	196.975	2.66069	0	1.64376	0.00101691	5.83453	20.5877	42.2445	1.74654	0	2.54188	1.84763	7.71709	32.3244	158.278
260	72.75	32.75	165	24.3421	16.7707	30.831	101.968	0	0	538989	0.101373	0.464501	0.565874	0.041712	0.00366268	0	0	NA	0.23043	2.19106	59.9408	NA	NA	NA	NA	6.44291	NA	11.1531	7.43337	3.83262	NA	3.60345	NA	5.71104	470.937	2.6475	0	4.94804	0.00614234	16.4787	18.4239	134.007	1.85973	0	5.94048	4.08682	18.535	29.7108	189.883
261	72.75	33.25	173	24.4432	16.696	31.005	141.032	20.6505	175.898	490269	0.154492	0.423038	0.577531	0.0318241	0	0	0	NA	0.149598	2.10415	46.2166	0.00878442	NA	NA	NA	7.04893	0.0190531	16.5702	10.1866	6.42527	NA	3.31884	NA	8.50435	463.322	2.74253	0	4.01401	0.00605955	13.5203	16.8569	80.7162	1.80159	0	4.09636	3.3451	12.518	27.3228	266.514
262	72.75	33.75	201	23.2293	15.4833	29.5968	172.194	0	0	1.2403e+06	0.215326	0.383521	0.598848	0.0318594	0.0187275	0	0	NA	0.47256	1.09133	58.3365	0.142671	0.101796	0.0693847	0.0846053	5.98942	0.477045	10.0418	7.35296	5.52805	NA	5.89459	0.258112	4.88934	528.131	2.89524	0	7.49902	0.0121318	24.4759	16.9235	162.251	1.79494	0	8.36241	5.68782	26.4783	26.2654	300.557
263	72.75	34.25	241	19.9993	12.7613	25.7855	278.581	246.699	2829.86	931140	0.146598	0.310851	0.457449	0.0174718	0.012911	0	0	0.00806956	1.63849	3.45795	51.9186	0.407709	0.484522	0.240504	0.252871	6.55053	1.84417	4.25744	9.12054	4.68741	NA	10.1982	1.7941	3.68437	862.279	2.78439	1.78888e-05	19.3416	0.00820541	62.9119	15.6792	362.06	1.74759	0.00339411	14.3323	10.2663	46.6037	25.4419	334.185
264	72.75	34.75	241	15.5487	8.95984	20.7699	331.871	147.5	2740.48	684010	0.0309365	0.279143	0.31008	0.00457102	7.45923e-13	0	0	0.0883986	5.02478	4.18298	26.6223	1.47114	1.452	0.483558	0.955983	10.3552	6.79915	7.04515	10.5338	7.23493	NA	10.2203	0.413649	7.61859	1676.06	2.72023	9.03722e-05	32.2614	-0.00204819	105.472	12.1512	608.698	1.74083	0.00886661	14.9072	13.5579	49.3646	18.7132	428.284
265	72.75	35.25	218	6.63397	1.24406	10.9606	317.806	0	0	259691	0.0278837	0.0969043	0.124788	0.0420777	0	0	0	7.6213	4.48068	3.5512	9.1516	2.76965	2.28205	1.41425	2.50968	22.2163	4.64449	6.542	8.30511	9.99941	5.14807	4.18069	0.133256	7.94185	2953.37	2.63331	0.00446103	43.1532	0.0324352	141.157	11.0527	818.417	1.7931	0.0608077	17.6088	17.3494	57.6098	17.0452	1004.99
266	72.75	35.75	184	1.62134	-3.48581	5.85546	166.806	0	0	59059.9	0.00516989	0.0179465	0.0231164	0.0924113	0	0	0	18.5348	1.01534	6.49429	6.82429	0.765538	0.571833	0.363997	0.581344	27.4618	0.890721	1.55017	10.7298	3.76485	13.3717	4.8752	0.0535003	2.69435	4065.69	2.64871	0.00496099	41.1641	0.0554453	135.045	11.2362	628.222	1.80724	0.0699146	20.2642	17.6483	65.1459	17.6798	2111.03
267	72.75	36.25	166	0.794665	-4.4338	5.06589	106.129	0	0	37506.8	0.00331394	0.00834098	0.0116549	0.179012	0	0	0	41.4588	0.279222	5.66799	5.64044	0.297249	0.264167	0.252343	0.140388	13.9545	0.229938	0.509055	9.72208	1.61025	14.0316	5.14571	0.131972	1.20777	4013.8	2.73141	0.00482378	40.2027	0.041179	132.42	11.2782	727.568	1.81348	0.0692444	19.3412	15.4241	63.0149	16.9893	2185.36
268	72.75	36.75	165	-0.269111	-5.58798	4.01279	85.2903	0	117.048	20217.8	0.00243939	0.00850901	0.0109484	0.206083	0	0	0	33.2785	0.0908343	1.88875	1.86993	0.146502	0.126597	0.103762	0.241692	3.19905	0.114403	0.193544	2.81888	0.482661	12.4551	1.69177	0.120878	0.312146	4328.36	2.68517	0.00809544	41.5334	0.0542348	136.56	10.9096	693.516	1.76707	0.0888676	21.6285	15.8925	69.8707	16.8977	2519.33
269	73.25	29.75	123	27.8936	19.7827	35.3252	27.5806	0	0	682924	0.586514	0.0880348	0.674549	0.0331237	0.0034725	0	0	0.404014	0.00803028	0.402069	60.8003	NA	NA	NA	NA	1.81224	NA	0.792328	1.81817	1.30501	0.0864676	1.5572	NA	0.439023	156.943	2.66476	0	1.19041	0.00480127	4.42938	21.8855	4.71432	1.8039	0	1.00116	1.33589	2.13539	33.1254	97.816
270	73.25	30.25	130	27.9422	19.8616	35.3075	31.3871	296.909	2038.35	1.21501e+06	0.690183	5.91179e-10	0.690183	0.0462113	0.00906787	0	0	0.498154	0.0101714	0.127772	90.7982	NA	NA	NA	NA	0.793988	NA	0.494567	0.875084	0.568142	0.0775315	1.40875	NA	0.341712	160.038	2.64275	0	1.11016	0.00468621	4.20703	21.5512	4.63372	1.78085	0	0.867257	1.21171	1.69595	32.9392	130.837
271	73.25	30.75	137	27.6473	19.7293	34.7581	38.6129	66.2419	477.801	1.68198e+06	0.682164	1.13242e-09	0.682164	0.0459886	0.0213817	0	0	2.26625	0.0394942	0.25049	92.7683	NA	NA	NA	NA	0.705872	NA	0.510044	1.01471	0.508214	0.2079	3.88765	NA	0.681591	171.252	2.64731	0	0.955888	0.00326263	3.81268	21.8121	4.95392	1.7807	0	0.784712	1.06072	1.47093	33.1914	151.803
272	73.25	31.25	139	27.0475	19.3095	33.9952	47.3226	1.2043	11.6398	3.12107e+06	0.602976	0.0166535	0.619629	0.0327437	0.0765648	0	0	NA	0.021523	0.660451	82.953	NA	NA	NA	NA	0.628509	NA	0.29921	0.6992	0.399087	NA	14.497	NA	0.385576	182.29	2.6731	0	1.03135	0.00144355	4.00763	21.6259	4.81266	1.79482	0	0.854037	1.1507	1.6878	33.0268	153.607
273	73.25	31.75	148	26.8059	19.1229	33.6664	57.9032	0	0	1.17074e+06	0.670426	0.00242718	0.672853	0.0377221	0.00329842	0	0	0.00804542	0.155554	0.937114	89.7776	NA	NA	NA	NA	0.719095	NA	0.888269	0.62465	0.553737	0.0160923	6.34649	NA	0.549499	190.229	2.6875	0	1.21506	0.00190736	4.4987	21.1448	5.10443	1.79538	0	0.979063	1.33438	2.07006	32.5118	162.919
274	73.25	32.25	152	26.5062	18.7753	33.3494	86.5806	251.591	1573.98	889953	0.680743	1.75342e-09	0.680743	0.0446671	0	0	0	NA	0.112735	0.580177	92.1987	NA	NA	NA	NA	0.667224	NA	1.44923	0.717869	0.501781	0.0161735	3.57126	NA	0.748515	200.829	2.67994	0	1.51257	0.00350818	5.30092	21.0152	6.22309	1.79143	0	1.14207	1.6291	2.44156	32.5414	171.808
275	73.25	32.75	174	25.2614	17.5333	31.9455	113.613	327.489	1785.47	655802	0.299832	0.287728	0.58756	0.040989	0.00263667	0	0	NA	0.161834	2.31737	71.7672	0.0167934	0.025067	NA	0.0208232	6.42529	0.0468974	2.8259	6.58189	2.82592	0.0118987	4.39198	NA	3.1765	370.855	2.60192	0	5.207	0.0083002	17.1166	17.6351	114.482	1.77406	0	5.56508	4.24243	17.3553	29.5138	180.657
276	73.25	33.25	208	23.6585	15.8744	30.0573	147.968	0	0	834302	2.65041e-07	0.653129	0.653129	0.0574724	0	0	0	NA	0.193283	1.89755	79.1459	0.0305911	0.155136	0.231263	0.164113	3.18554	0.088199	1.93138	4.74872	1.8772	NA	5.18348	1.23962	2.08012	481.571	2.72496	0	5.00106	0.00218525	16.6628	16.4746	86.0589	1.76203	0	4.28858	3.80791	13.2435	27.15	296.75
277	73.25	33.75	262	21.0143	13.636	26.8675	250.226	0	0	1.40757e+06	0.0166073	0.370724	0.387332	0.0183366	0.0244443	0	0	NA	3.21857	2.56456	52.1269	0.640847	0.484977	0.124599	0.0548765	5.41739	4.90483	4.18595	8.01867	3.81785	0.00806157	11.1328	0.226355	4.69179	915.071	2.91104	0	15.6101	0.0108774	51.0369	13.8276	353.692	1.72478	0	11.1395	8.39564	36.0699	21.3146	398.334
278	73.25	34.25	276	17.9049	11.2263	23.0424	317.71	0	0	1.49647e+06	0.158999	0.244632	0.403631	0.010054	0.0299068	0	0	NA	3.38406	5.18299	35.7231	1.0255	0.839947	0.248352	0.256531	8.01045	6.30034	4.43297	11.5095	4.82908	0.0171862	12.9681	0.0149944	4.87967	1342.13	2.78814	0.000104214	24.3385	0.00621466	79.326	12.4251	463.858	1.76184	0.00410549	13.2655	11.4154	43.3777	19.2104	442.878
279	73.25	34.75	258	9.6293	4.27577	13.8102	295.097	0	0	448681	0.0351249	0.170633	0.205758	0.0317294	1.37518e-13	0	0	1.09204	4.59844	2.92696	15.2653	2.55529	2.78911	1.04614	1.5569	20.3752	6.92918	5.82737	10.3774	9.41209	1.00145	7.22468	0.0324312	7.5606	2418.5	2.7595	0.000437914	36.1454	0.00881504	118.447	11.7223	807.52	1.76797	0.0173383	14.3583	14.1916	47.5193	17.265	586.31
280	73.25	35.25	214	6.95042	1.56132	11.3129	179.387	40.0538	2570.8	199546	0.032984	0.0894691	0.122453	0.0437342	0	0	0	1.72001	6.43994	1.80648	4.29954	3.70877	3.18132	1.75794	2.06273	24.4595	5.0511	13.2303	5.4817	11.9214	1.74586	2.07617	0.372574	11.214	2794.32	2.67079	0.00648382	48.352	0.0220358	157.845	11.2823	957.338	1.81092	0.0733166	17.1543	19.3022	56.2357	17.0059	684.816
281	73.25	35.75	185	3.19435	-2.05574	7.57729	82.0645	0	0	54667.6	0.0166913	0.0345472	0.0512385	0.124001	0.000242327	0	0	5.77407	1.71474	4.95583	5.21547	1.00389	0.890821	0.504258	0.467463	41.7693	1.095	4.56561	10.4057	6.53217	6.09985	3.78538	0.135344	5.63045	3807.02	2.56742	0.00560885	41.6691	0.0420856	136.637	10.9853	684.508	1.78665	0.0707843	18.9539	17.5786	61.1858	17.1912	1656.67
282	73.25	36.25	158	0.0686904	-5.23151	4.36884	86.2581	0	89.5161	42456.6	0.00376148	0.00970325	0.0134647	0.183919	0.000128955	0	0	28.4459	0.462072	5.31298	5.10754	0.240282	0.33408	0.332802	0.100071	23.1824	0.30271	1.60734	10.4439	3.43351	13.2192	4.85016	0.118983	3.05428	3982.99	2.5776	0.00446807	41.2035	0.0333283	135.645	10.9745	739.464	1.81118	0.0641497	18.4673	14.9743	60.4056	17.1125	2058.71
283	73.25	36.75	158	-0.16572	-5.59381	4.18256	84.129	0	72.5968	21337.2	0.0014584	0.00601684	0.00747524	0.210512	0	0	0	31.0053	0.163366	2.04126	1.84653	0.145097	0.175022	0.190897	0.434019	4.94669	0.156287	0.400109	3.10741	0.755375	16.2618	1.94052	0.175686	0.656315	4348.67	2.68892	0.00518993	38.5477	-0.00312863	127.061	11.4294	704.19	1.83378	0.0692841	20.7619	13.6994	67.8172	17.6682	2556.21
284	73.75	30.25	138	28.0213	20.0775	35.2862	32.6774	307.484	2111.98	748553	0.632929	0.0383798	0.671308	0.0363525	0.00317189	0	0	3.9288	0.0322	0.335458	61.5107	NA	NA	NA	NA	1.29021	NA	0.800696	1.61463	0.877016	0.376135	1.2582	NA	0.626213	170.362	2.6576	0	1.33177	0.00478137	4.76591	21.1849	4.42858	1.79558	0	0.961207	1.41829	1.93701	32.4787	144.542
285	73.75	30.75	141	27.7677	19.9226	34.8228	33.129	0	0.994624	1.31101e+06	0.695118	8.77011e-07	0.695119	0.0473813	0.00300027	0	0	0.807793	0.0350018	0.318376	88.7254	NA	NA	NA	NA	0.60357	NA	0.494945	1.09436	0.412219	0.104998	3.19621	NA	0.480606	179.459	2.65326	0	1.32491	0.00277516	4.76703	20.8574	6.34825	1.78342	0	0.95047	1.40393	1.89374	32.2534	156.818
286	73.75	31.25	146	27.1401	19.5207	34.0168	49.0645	68.5484	494.478	1.35405e+06	0.685544	0	0.685544	0.0454628	0.0104703	0	0	NA	0.0354246	0.214914	93.2036	NA	NA	NA	NA	0.825055	NA	0.335249	0.85499	0.324986	NA	3.86047	NA	0.486752	191.371	2.67301	0	1.17066	0.00166749	4.39722	21.4145	5.40161	1.79409	0	0.960799	1.30074	1.97443	32.8359	162.89
287	73.75	31.75	151	26.9474	19.3838	33.7734	60.9677	1.16667	10.7097	1.45279e+06	0.689829	0.00232028	0.69215	0.0454673	0.0114485	0	0	NA	0.0427731	0.126557	96.1947	NA	NA	NA	NA	0.245825	NA	0.106217	0.229963	0.347825	NA	3.39098	NA	0.137959	202.126	2.68064	0	1.1461	0.00190167	4.3118	21.3123	4.77046	1.79531	0	0.970744	1.29271	2.02265	32.6904	173.596
288	73.75	32.25	154	26.5406	18.8554	33.4061	94.7419	254.43	1602.03	1.1054e+06	0.675347	1.69471e-09	0.675347	0.0452984	0.00516582	0	0	NA	0.0220914	0.20981	92.8061	NA	0.00805439	NA	0.00804997	1.04563	NA	0.967558	0.703317	0.615435	0.0161066	3.78442	NA	0.485238	211.643	2.69169	0	1.53264	0.00353065	5.37477	20.9048	5.95235	1.79292	0	1.17477	1.66434	2.51793	32.3592	175.857
289	73.75	32.75	197	25.766	17.899	32.5224	115.29	326.984	1789.43	1.4454e+06	0.469605	0.17861	0.648215	0.0383954	0.0191698	0	0	NA	0.0888393	1.97428	80.588	0.0228296	0.0334903	0.0450461	0.027142	3.3959	0.0448189	0.949764	4.26375	1.05433	0.00976541	5.79214	0.112861	1.31759	267.097	2.67247	0	3.51798	0.00563516	11.6005	18.6029	59.9417	1.73404	0	4.17231	3.40866	12.6951	30.1326	189.843
290	73.75	33.25	253	23.3	15.4945	29.5286	144.839	320.769	1775.84	697568	0.0793637	0.497091	0.576455	0.0303267	0.00287183	0	0	NA	1.25329	1.01539	67.2552	0.167908	0.2016	0.305409	0.217033	4.4983	0.515266	2.23639	6.77152	2.29415	NA	4.55832	1.7973	2.8584	539.467	2.64545	1.51984e-05	10.6595	0.0139572	34.6546	15.7628	162.84	1.70724	0.00156827	8.50353	6.99806	27.2534	26.1255	231.113
291	73.75	33.75	288	17.9275	11.2813	22.9556	276.677	251.242	1597.22	999635	0.00857266	0.300606	0.309179	0.00360092	0.0159755	0	0	NA	5.46498	1.60136	29.6556	0.701066	0.593359	0.165709	0.132984	9.28363	6.61025	7.18592	9.32308	6.78575	NA	6.53003	NA	9.03225	1330.17	2.63396	5.07716e-05	24.3151	0.0143101	79.6458	11.6733	447.313	1.73627	0.00313867	10.5571	10.5069	34.8827	18.2686	399.443
292	73.75	34.25	282	12.0235	6.57266	15.8968	333.452	197.538	1493.66	469523	0.0304976	0.158115	0.188612	0.00418212	0.00161011	0	0	0.0802614	5.76308	0.697145	12.551	2.50153	2.85189	1.02008	1.49128	10.8489	11.0284	7.05432	8.74122	7.44694	0.112368	2.81298	0.0401367	8.05302	1930.2	2.67312	0.000513811	37.1484	-0.00529935	120.728	11.2709	634.186	1.78278	0.0207699	13.0469	14.7204	43.4822	17.1788	617.199
293	73.75	34.75	249	5.61097	0.392494	9.62626	266.613	36.9839	555.489	168788	0.0019277	0.101181	0.103109	0.0598793	0	0	0	3.14442	2.94923	1.92063	7.37282	2.17027	2.4176	1.01519	1.25691	33.8052	5.06371	3.81643	8.23705	9.04235	2.61006	3.75505	0.14104	5.54583	3259.36	2.68445	0.00159746	39.8399	0.0274582	130.541	11.0271	732.587	1.76758	0.0391086	15.548	14.9604	51.0567	16.7273	1073.66
294	73.75	35.25	202	4.19935	-1.07071	8.46951	104.613	38.4731	2546.37	74141.8	0.00865484	0.0512809	0.0599357	0.102602	0	0	0	1.32442	2.34953	1.29021	2.71458	1.07149	0.921605	0.425313	0.53489	41.7215	1.45311	11.5834	3.69214	14.9535	1.24827	1.57095	0.0508986	13.0265	3199.32	2.64803	0.00170947	40.3442	0.0216659	132.105	11.5344	959.463	1.84712	0.0405432	15.502	15.829	50.7716	17.7411	958.103
295	73.75	35.75	181	3.79982	-1.52298	8.32148	71.9032	0	0	46371.4	0.0191157	0.0464599	0.0655756	0.120378	2.65429e-05	0	0	0.673342	1.30536	2.03053	2.38914	0.354744	0.413505	0.168334	0.223949	49.4753	0.464477	9.22208	6.13051	13.1542	1.3606	1.93504	0.0248776	11.2357	3548.5	2.59049	0.00140083	36.6872	0.0455563	120.422	11.2788	823.017	1.78035	0.0328829	16.0183	14.757	52.3149	17.2563	1265
296	73.75	36.25	157	2.60472	-2.92641	7.09084	72.3871	0.0107527	141.435	56832.4	0.00636682	0.0148612	0.021228	0.174073	0.00046455	0	0	17.9637	0.683215	4.15375	4.14772	0.324916	0.276303	0.483162	0.265913	30.1771	0.355365	4.85056	8.64871	6.98838	10.7291	3.82108	0.286745	6.43686	3717.39	2.60909	0.00245647	40.4603	0.0297774	133.022	11.1492	839.459	1.79992	0.0414604	17.8893	14.2028	58.8097	17.0526	1670.05
297	73.75	36.75	152	-2.33651	-7.80082	2.01299	73.5806	0	0	19695.4	0.000777341	0.00237604	0.00315339	0.170582	0	0	0	26.4613	0.183198	2.00921	1.84728	0.153905	0.109335	0.192175	0.398405	6.76081	0.151847	0.938822	3.09523	1.33136	21.67	1.74263	0.237644	1.26406	4382.23	2.70383	0.00477333	35.9323	0.0255548	117.97	11.9153	652.28	1.81816	0.0532114	21.0394	13.3427	68.3072	18.3181	2456.38
298	74.25	30.75	146	27.7959	20.0437	34.8237	31.6129	325.323	2212.91	944082	0.726192	1.96041e-09	0.726192	0.0323003	0	0	0	NA	0.0612135	0.35343	48.8923	NA	NA	NA	NA	0.833468	NA	1.60697	1.54412	0.901116	NA	1.52912	NA	1.13539	187.725	2.65896	0	1.45551	0.00197848	5.11336	20.6094	4.95348	1.78386	0	1.09249	1.56546	2.34312	32.1264	161.077
299	74.25	31.25	154	27.0922	19.6087	33.8801	54.1613	0	0	3.15018e+06	0.602526	0.0130852	0.615611	0.035792	0.0665205	0	0	NA	0.0673559	1.72787	67.8085	NA	NA	NA	NA	0.803674	NA	0.66272	1.06294	0.434568	NA	16.5358	NA	0.633731	201.913	2.67522	0	1.97676	0.000563879	6.5735	20.3025	5.603	1.79927	0	1.447	2.10782	3.16323	31.8068	157.834
300	74.25	31.75	157	26.7565	19.2906	33.4359	68.0645	70.4677	508.156	4.5612e+06	0.599468	1.47868e-09	0.599468	0.0361006	0.120773	0	0	NA	0.148406	1.12951	82.8907	NA	NA	NA	NA	0.769407	NA	0.263827	0.696395	0.405199	NA	8.96767	NA	0.336898	211.735	2.67318	0	1.45136	0.002293	5.13087	20.8994	5.47964	1.79003	0	1.1439	1.59339	2.43698	32.4306	178.077
301	74.25	32.25	180	26.0376	18.3374	32.789	90.6129	0	0	3.00572e+06	0.639979	0.0158805	0.65586	0.0422653	0.0767213	0	0	NA	0.166968	0.480346	88.5615	NA	NA	0.00803999	NA	0.858127	NA	0.166311	0.451727	0.363506	NA	7.69833	NA	0.244681	226.08	2.70208	0	1.17428	0.00380793	4.37996	21.3072	6.72262	1.78365	0	0.970913	1.31123	2.02939	32.6851	195.298
302	74.25	32.75	227	25.0379	17.1676	31.6248	108	255.522	1626.38	1.40446e+06	0.392516	0.269743	0.662259	0.0356692	0.02154	0	0	0.00806632	0.257082	0.545324	76.2981	0.00803246	NA	0.00808295	NA	1.07887	0.171001	0.469285	1.94076	0.489559	NA	3.24748	NA	0.644741	305.85	2.72414	0	3.84223	0.00541573	12.8324	17.7655	94.3128	1.66676	0	5.21219	3.63279	16.1612	28.4093	212.068
303	74.25	35.25	202	3.72678	-1.61512	8.17355	115.806	36.3978	2518.72	74054.2	0.00882574	0.0410031	0.0498289	0.118792	0.000769968	0	0	1.86466	1.25477	1.93525	3.18547	0.445873	0.463653	0.158981	0.204328	36.7254	0.86446	11.2396	3.55672	15.1495	3.13677	1.99032	0.0301663	12.8132	3197.02	2.68733	0.00196632	38.5169	0.00430537	126.353	11.6306	962.939	1.8272	0.0381142	15.8245	14.8424	52.0991	17.6352	1090.67
304	74.25	35.75	173	3.9508	-1.54048	8.58175	61.9355	1.11828	261.565	70673.8	0.0148943	0.0434813	0.0583757	0.124328	0.00119741	0	0	1.90347	1.18837	2.76909	3.52497	0.278442	0.488954	0.265366	0.33772	40.2137	0.506196	8.86081	6.52562	14.7845	3.47711	2.68738	0.0421997	12.6897	3367.99	2.64259	0.00523694	38.3117	0.034279	125.769	11.4353	953.588	1.81562	0.06824	18.3571	15.2647	60.017	17.4207	1279.02
305	74.25	36.25	158	3.07387	-2.61829	7.69963	52.9032	0.0268817	105.344	50066	0.00917772	0.0225807	0.0317584	0.112845	0.000266695	0	0	17.1216	0.743624	3.86803	3.40127	0.398456	0.519028	0.896706	0.412656	23.8035	0.489332	4.39991	6.1639	7.26734	20.4748	3.30588	0.383468	6.89405	3877.88	2.60282	0.0126144	44.9173	0.0393894	147.154	11.0226	934.191	1.78293	0.106863	21.9552	17.4051	71.1668	16.9252	1568.63
306	74.25	36.75	142	0.0413127	-5.64796	4.58272	55.8387	0	0	18138.2	8.89684e-05	0.000691699	0.000780667	0.0602241	0	0	0	31.1641	0.238131	1.82189	1.34562	0.206008	0.250525	0.347136	0.816752	5.51051	0.167886	0.813604	2.08882	1.32081	22.8066	1.35083	0.458173	1.26893	4502.31	2.57443	0.0194116	44.0282	0.0437166	143.775	11.027	716.911	1.78044	0.136552	25.6574	17.6954	82.3746	17.9278	2535.03
307	74.75	32.25	212	25.1591	17.3561	31.8427	91.7419	0	0	1.75132e+06	0.682175	0.0141425	0.696317	0.0480927	0.0143844	0	0	NA	0.0311711	0.174679	72.6069	NA	NA	NA	NA	0.149118	NA	0.11087	0.167947	0.0878058	NA	2.7294	NA	0.0338455	243.086	2.74334	0	1.27485	0.000989714	4.65909	20.4146	11.7024	1.75343	0	0.982607	1.37825	2.03192	31.5959	208.171
308	74.75	34.75	216	4.24246	-1.34125	8.62818	359.484	0	0	56013.9	0	0.105597	0.105597	0.071176	0	0	0	2.5028	1.01275	2.66872	7.64705	0.789034	0.967305	0.352672	0.71165	30.1843	1.4915	1.74408	8.15423	6.069	4.26106	5.18329	0.0155316	2.75585	3825.06	2.70288	0.00147505	36.4174	0.0134249	120.296	11.0525	577.068	1.76187	0.0357538	15.8441	13.5494	52.1565	17.2115	2143.18
309	74.75	35.25	183	0.232881	-5.29369	4.73124	183.194	0	0	63518.9	0.00550742	0.0403016	0.045809	0.105173	0.000758495	0	0	3.17083	0.820589	3.73177	5.82508	0.426512	0.384964	0.163951	0.20456	42.189	0.672727	2.55563	6.44618	9.6093	9.87219	4.24972	0.10193	5.81066	3805.05	2.68882	0.00605522	40.3098	0.0272205	132.802	11.3355	953.087	1.84147	0.0749371	19.11	15.3752	62.2161	17.669	1385.09
310	74.75	35.75	159	2.12113	-3.52527	6.79419	78.1613	36.1882	2513.19	55564.8	0.00901965	0.0376714	0.0466911	0.120642	0.000587852	0	0	7.80717	1.07712	3.81679	4.05102	0.428825	0.486	0.221557	0.11044	27.4787	0.508402	5.33275	4.97941	12.1948	19.013	3.03035	0.178735	9.82842	3606.89	2.71854	0.0108091	44.4641	0.0339141	145.949	11.198	1095.47	1.78918	0.102893	21.6235	17.3205	70.3763	16.6534	1269.31
311	74.75	36.25	146	0.882149	-4.88245	5.53045	48.7097	0	84.9785	56753.9	0.0124302	0.0122853	0.0247155	0.0911675	0.00124427	0	0	29.5467	0.565099	3.7533	3.33368	0.397095	0.604973	0.892556	0.31276	12.2264	0.493408	2.60839	4.91622	4.23595	28.9993	3.06566	0.742862	3.84925	4118.44	2.58412	0.02634	47.9144	0.0225197	156.731	11.2524	1076.63	1.83015	0.157935	26.4368	19.1414	85.4403	17.8625	1805.8
312	74.75	36.75	133	-3.29169	-9.01751	1.29749	41.1613	0	39.414	33204.8	0	0.000624225	0.000624225	0.0865172	0	0	0	50.4263	0.236928	1.96922	1.76387	0.275286	0.294773	0.401741	0.563813	3.56345	0.279415	0.537596	2.34835	0.603342	21.5142	1.8298	0.353889	0.631028	4507.07	2.57881	0.0163153	44.6407	0.0394687	145.985	11.3015	744.576	1.8025	0.122372	23.2829	17.9017	74.8566	18.124	2587.97
313	75.25	32.25	261	24.5616	16.7483	31.0306	97.0645	67.1237	500.091	1.27506e+06	0.554471	0.17062	0.725091	0.0402187	0.00356134	0	0	NA	0.0161194	0.0160785	37.6884	NA	NA	NA	NA	0.211399	NA	0.0806116	0.491219	0.0725436	NA	0.220813	NA	0.0966268	258.734	2.74721	0	1.35841	-0.000315399	4.91577	19.1832	14.192	1.71591	0	0.978546	1.40481	2.11423	30.2892	220.189
314	75.25	34.75	185	1.15196	-4.65072	5.70387	371.581	0	0	29623.7	0.000437317	0.061734	0.0621713	0.134508	0	0	0	1.48314	0.170548	2.37498	8.44144	0.0697396	0.0536465	0.0241745	0.0322208	37.4984	0.17365	1.12291	8.59984	6.36055	1.87692	6.70443	0.00917344	2.35318	4139.38	2.53211	0.000168605	28.746	0.0271433	94.8603	11.8891	359.947	1.83016	0.0110449	15.3324	11.3987	50.4869	18.9498	2813.88
315	75.25	35.25	150	1.97373	-3.87778	6.65086	144.355	0	0	40436.3	0.00281413	0.0166484	0.0194625	0.125946	0.000242783	0	0	5.30843	0.272174	6.12791	9.59228	0.157601	0.193471	0.090262	0.0476612	39.8701	0.316006	1.10352	8.69351	5.16176	12.7902	6.86921	0.114403	2.64455	4056.48	2.62148	0.00655957	36.2182	0.0471072	118.77	11.7662	671.511	1.83384	0.0745628	20.2004	15.8708	64.8372	18.7704	2015.3
316	75.25	35.75	133	-0.232641	-6.1189	4.48022	97.3548	33.543	2181.69	46128.3	0.00467383	0.0285248	0.0331987	0.11157	0	0	0	13.564	0.273635	6.63561	5.82482	0.284966	0.405661	0.17477	0.135922	18.7048	0.301449	0.808984	6.72615	3.64756	36.0254	4.69532	0.170798	2.14681	4276.84	2.58122	0.0137927	42.0307	0.0524649	137.854	10.9324	842.328	1.7748	0.11549	24.283	17.9653	78.1652	17.8247	1797.48
317	75.25	36.25	121	-4.43906	-10.3059	0.247576	51.8387	0	0	11664.6	0	0.00101281	0.00101281	0.0223868	0	0	0	37.5362	0.222975	3.20679	2.08893	0.254359	0.393263	0.513678	0.194133	3.697	0.319108	0.422287	2.53951	1.02566	44.8549	2.06108	0.416853	0.720888	4722.24	2.6844	0.0216433	45.0432	0.0505885	147.625	11.3891	850.209	1.78656	0.143995	26.2959	19.3361	84.7835	17.1146	2423.19
318	75.25	36.75	117	-4.51817	-10.4276	0.218263	34.4194	0	0	12439.2	0	1.12968e-05	1.12968e-05	0.032946	0	0	0	40.7767	0.168664	1.16531	1.05999	0.150421	0.158488	0.210925	0.342806	0.965664	0.196622	0.230999	1.03368	0.258673	27.5462	0.967823	0.30971	0.224974	4832.78	2.5949	0.00736418	42.6035	0.0383551	139.657	11.5037	606.369	1.83115	0.0763149	20.204	16.8459	65.5904	18.1553	2972.48
319	75.75	34.75	138	-1.48055	-7.60248	3.26859	173.806	1.32258	570.376	12576.2	0.000626305	0.00622698	0.00685329	0.133953	0	0	0	12.8713	0.0794561	6.83153	9.50742	0.0312392	0.0156187	0.0231741	NA	23.2195	0.0171687	0.080465	7.48971	1.35872	6.70147	14.1322	0.0242101	0.339317	4304.47	2.62921	0.000581619	31.4002	0.0478744	100.143	11.8365	489.018	1.82851	0.023819	16.2204	12.6295	52.8288	18.3194	2818.62
320	75.75	35.25	128	2.84776	-3.37661	7.74569	65.4194	32.0161	2136.06	121564	0.0129846	0.0156301	0.0286147	0.158943	0.0034451	0	0	31.9208	0.314321	9.74573	9.61212	0.161274	0.104764	0.0984555	0.077976	14.8844	0.323254	0.575272	7.08559	2.1051	12.6141	9.43386	0.13915	1.00978	3850.17	2.6069	0.00788436	36.8657	0.0286405	120.965	12.032	833.433	1.81097	0.0832134	21.9592	16.0286	71.0484	19.604	2247.75
321	75.75	35.75	122	-2.562	-8.70134	2.26682	67.9355	0	0	36292.4	0.00218179	0.00816461	0.0103464	0.0831894	0.000264772	0	0	24.849	0.219078	5.04827	4.20741	0.152328	0.171623	0.146892	0.0842469	4.34228	0.21954	0.348343	2.98338	0.949477	50.6939	3.29223	0.178787	0.541376	4421.18	2.63644	0.01937	39.3242	0.00403884	128.972	11.6508	837.908	1.76773	0.136296	27.6013	18.6127	88.6038	18.5642	2364.19
322	75.75	36.25	102	-1.93465	-8.08988	2.96949	52.2581	0	0	8582.77	0	8.94475e-05	8.94475e-05	0.011238	0	0	0	34.3166	0.0616844	1.40534	1.10197	0.0400135	0.0911622	0.0913362	0.0245856	0.5953	0.0745443	0.0730098	0.891234	0.181829	54.1208	0.972403	0.0417821	0.110887	4921.27	2.60732	0.0140425	39.5499	0.0333749	129.662	11.664	641.304	1.82609	0.116524	24.6345	17.6464	79.2277	18.4535	3036.01
323	76.25	34.75	117	2.26181	-4.1892	7.39838	88.9355	25.8548	1761.17	36518	0.00123153	0.0138031	0.0150347	0.193364	0	0	0	25.3835	0.0637971	9.00658	6.75857	0.0165574	0.00803897	0.00805488	0.0155746	7.83083	0.0307986	0.15653	4.58631	0.783055	11.0182	13.128	NA	0.325271	4185.34	2.64477	0.002879	39.15	0.0312815	115.693	11.3297	719.359	1.82142	0.0444534	16.708	15.5006	54.0302	17.5455	2350.97
324	76.25	35.25	112	0.95428	-5.57108	6.03299	58.0968	4.36559	371.156	61181.6	0.00725486	0.0138436	0.0210985	0.136545	0.000295614	0	0	41.7938	0.204489	7.50465	5.44691	0.136731	0.0666178	0.0422055	0.0429172	4.23618	0.326835	0.241292	3.231	0.737632	25.7004	6.29761	0.107114	0.400372	4277.64	2.60661	0.0153837	42.4376	-0.0257213	139.048	11.2462	840.249	1.79519	0.109267	23.2047	18.696	74.5636	17.8937	2323.08
325	76.25	35.75	100	-3.32171	-9.724	1.66067	55.8065	0	0	7168.52	0	0	0	0.0182185	0	0	0	26.2867	0.0767373	2.04675	1.52183	0.122118	0.036698	0.0469433	0.0432362	0.733027	0.131541	0.10006	0.753392	0.170723	35.9689	1.22809	0.0416259	0.141419	4862.68	2.70987	0.0246204	42.0316	-0.158933	138.13	11.5807	737.476	1.78513	0.152763	28.7088	19.8881	92.3041	17.8179	3063.85
326	76.75	35.25	91	-5.09912	-11.7617	0.0252209	64.7742	0	0	22780.5	0.000770808	0.00359067	0.00436148	0.0609575	6.13712e-06	0	0	33.1913	0.240944	3.00901	1.40463	0.0816391	0.0643816	0.0635675	0.0516564	0.891565	0.230563	0.160566	0.758433	0.216826	46.5522	2.11083	0.143941	0.228569	4796.75	2.68411	0.0369955	44.3201	-0.0519153	145.01	11.4199	794.195	1.77767	0.18069	30.6319	22.6264	97.8439	17.7183	2695
327	77.25	35.25	77	-5.66525	-12.5979	-0.341398	50.8387	0	0	7686.39	0	0	0	0.0100926	9.97418e-05	0	0	15.0125	0.0386687	0.323597	0.124789	NA	NA	0.00805739	0.0161231	0.11646	0.0177152	0.0467259	0.0983122	0.0539654	48.0289	0.177397	NA	0.0310376	5362.68	2.58697	0.0116923	31.9869	0.03407	104.475	11.5092	503.477	1.74575	0.0994326	25.9868	16.0655	82.8382	18.6127	3816.89
[truncated: 13 more columns]
