# Supplementary material for: Global change impacts on bird biodiversity in South Asia: potential effects of future land-use and climate change on avian species richness in Pakistan
Source: PeerJ. 2023 Oct 6;11:e16212. doi: 10.7717/peerj.16212 (PMC10561643; doi:10.7717/peerj.16212)
Supplement: Supplemental Information 7 [file peerj-11-16212-s007.xlsx]

## Sheet: wintering_birds
x	y	sum	tas	tasmin	tasmax	pr	mindis	maxdis	population	cropland_irrigated	cropland_rainfed	cropland_total	pastures	urbanareas	biofuel_cropland_irrigated	biofuel_cropland_rainfed	Barren.or.sparsely.vegetated	Closed.shrublands	Cropland.Natural.vegetation.mosaic	Croplands	Deciduous.Broadleaf.forest	Deciduous.Needleleaf.forest	Evergreen.Broadleaf.forest	Evergreen.Needleleaf.forest	Grasslands	Mixed.forest	Open.shrublands	Permanent.wetlands	Savannas	Snow.and.ice	Urban.and.built.up	Water	Woody.savannas	elevation_mn	aspect_mn	slope_mn	tri_mn	tpi_mn	roughness_mn	flowdir_mn	elevation_sd	aspect_sd	slope_sd	tri_sd	tpi_sd	roughness_sd	flowdir_sd	elevation_min	aspect_min
1	61.75	25.25	114	24.2041	19.0322	29.5268	25.5484	1.85556	64.8778	37455.8	6.4588e-05	0.00280684	0.00287143	0.0036987	0	0	0	47.1796	0.0096246	0.226716	0.0852189	0.0150027	0.016127	0.0284515	0.00806413	0.0693412	0.0253168	0.0188271	0.052329	0.0263009	0.259812	0.0729002	0.171366	0.0257404	26.5013	2.7612	4.7139e-06	3.22871	0.0814331	10.5786	18.6399	29.1787	1.72095	0.000873424	3.87624	3.33576	11.5129	29.1014	-13.6169
2	61.75	25.75	115	23.3377	17.5158	29.1509	24.5806	0	0	18551.7	8.20433e-05	0.00311775	0.00319979	0.00641509	0	0	0	46.2077	0.00966395	0.219693	0.096852	0.0161924	0.0161939	0.0308249	0.00809758	0.0741359	0.0242906	0.0211605	0.0514124	0.0110739	0.248731	0.0822264	0.176577	0.0258472	145.905	2.5879	1.13582e-06	7.17069	0.0371985	22.4762	16.1093	92.335	1.78793	0.000210453	6.58072	6.04758	19.3258	27.2018	3.29017
3	61.75	28.75	66	17.9326	9.76102	26.2235	19.3226	0.65	7.51667	8153.01	0.000869404	0.00709521	0.00796461	0.00218537	0	0	0	51.0324	NA	NA	NA	NA	NA	NA	NA	NA	NA	NA	NA	NA	NA	NA	NA	NA	817.039	2.53643	0	2.94947	0.0140703	10.2023	16.2341	74.6839	1.56479	0	3.78085	2.84809	11.7424	27.358	682.281
4	61.75	29.25	68	17.4925	9.13176	25.8714	13.3871	0	0	3159.54	0	1.94585e-05	1.94585e-05	0.00702202	0	0	0	87.6764	NA	0.0495266	0.0196645	NA	NA	NA	NA	0.00945399	NA	NA	0.039885	NA	0.0467312	0.0507215	NA	NA	856.077	2.24796	0	4.2619	0.0209613	14.5008	20.6334	208.178	1.95307	0	5.34669	3.88932	16.741	33.4608	543.726
5	62.25	25.25	113	23.6885	18.2451	29.3665	23.3226	0	0	28861.8	0.000414595	0.00439185	0.00480644	0	0	0	0	80.3227	0.01613	0.217159	0.107596	0.0161262	0.0161246	0.0241889	0.00806324	0.0991005	0.0241878	0.00806494	0.0799083	0.0874765	0.253251	0.101052	0.169324	0.0276465	60.0913	2.74164	1.95676e-05	5.66448	0.219894	17.9409	16.5389	83.8811	1.58211	0.00387885	7.57702	5.34905	23.4038	26.9267	-15.5779
6	62.25	25.75	112	23.0923	17.079	29.1768	20.8065	1.46111	52.7111	40454.6	7.13835e-05	0.0151127	0.0151841	0	0	0	0	96.9235	NA	0.0611864	0.111785	NA	NA	NA	NA	0.0944656	NA	0.00809839	0.0864953	0.0219043	0.089178	0.112745	NA	0.0315132	142.908	2.66098	4.67696e-06	6.20019	0.0335382	19.5398	16.7342	131.142	1.77975	0.000915748	7.37055	5.91447	21.8147	27.5164	1.4812
7	62.25	26.25	99	21.2378	14.4993	27.7613	25	0.594444	16.8889	65107.6	0.00534407	0.0124124	0.0177564	0.0752595	0.00127541	0	0	71.6695	NA	0.138921	0.0459997	NA	NA	NA	NA	0.0639521	NA	NA	0.0542794	0.00809458	0.176655	0.179448	NA	NA	413.852	2.67993	0	9.88357	0.0291611	30.9803	15.0449	193.495	1.7075	0	9.86525	8.19411	29.6255	24.9237	99.864
8	62.25	28.75	66	19.4158	11.308	27.5331	5.83871	1.26111	12.3111	4639.15	0	0.000649303	0.000649303	0.0157293	0	0	0	87.365	NA	0.159478	0.0241016	NA	NA	NA	NA	0.0482054	NA	NA	0.080341	NA	0.125367	0.0803445	NA	NA	750.74	2.42658	0	2.2947	0.0128315	8.20958	15.5694	104.766	1.52121	0	3.14386	2.28337	9.72082	27.2163	595.868
9	62.25	29.25	64	17.6322	9.27717	25.9403	4.96774	0	0	2395.54	0	1.52638e-12	1.52638e-12	0.0556232	0	0	0	77.92	NA	0.0597901	0.0180578	NA	NA	NA	NA	0.0177354	NA	NA	0.0254731	NA	0.07636	0.0690764	NA	NA	908.806	2.70963	1.51411e-06	3.90817	0.0185136	13.2964	20.8094	129.362	1.97598	0.000495015	4.81845	3.45578	15.0086	31.0241	626.56
10	62.75	25.25	109	23.5389	17.7682	29.5405	18.7742	0	0	13751.4	0	0.00775622	0.00775622	0	0	0	0	67.7745	NA	0.105287	0.0146195	NA	NA	NA	NA	0.035792	NA	0.00805708	0.00805788	0.0408595	0.0950819	0.0175733	NA	0.00805673	78.491	2.64832	3.22238e-06	6.21312	0.0184677	19.8473	17.293	110.739	1.77165	0.00160475	8.79934	5.91906	27.2746	28.3859	-11.6025
11	62.75	25.75	111	22.8536	16.5958	29.2098	16.5806	1.35	45.3389	19940.5	3.58747e-06	0.00546244	0.00546603	0.000209693	0	0	0	94.2181	NA	0.105594	0.0455356	NA	NA	NA	NA	0.0251067	NA	0.0227552	0.0412498	0.0210987	0.199942	0.187445	NA	0.0426499	126.411	2.69043	6.25679e-07	5.60973	0.0317512	17.8179	17.2975	98.3916	1.78695	0.000311589	7.2375	5.5005	21.5351	28.0302	20.8229
12	62.75	26.25	98	21.5467	14.6825	28.2282	18.8065	1.20556	39.7278	62436	0.00796451	0.0179218	0.0258863	0.00853397	0	0	0	99.0173	NA	0.171167	0.124883	NA	NA	NA	NA	0.179956	NA	0.0551987	0.112277	0.0132924	0.153077	0.19228	NA	0.0378329	593.191	2.65707	0	10.6293	0.0499359	33.0529	15.6149	200.758	1.80167	0	9.16564	8.28733	27.3583	25.8227	110.082
13	62.75	28.75	63	19.9903	11.8591	28.0731	2.48387	0	0	5650.36	0	0.000145366	0.000145366	0.00045594	0	0	0	95.7341	NA	0.0160715	NA	NA	NA	NA	NA	NA	NA	NA	NA	NA	0.00803558	NA	NA	NA	730.229	2.53639	0	2.15096	0.00215113	7.64864	13.7175	161.889	1.3126	0	3.34893	2.43674	10.1957	24.1108	518.054
14	62.75	29.25	64	16.1257	7.62901	24.5536	2.06452	0	0	1516.11	0	0.016381	0.016381	0.109526	0	0	0	69.5863	NA	0.138348	NA	NA	NA	NA	NA	NA	NA	NA	NA	NA	0.164806	0.23825	NA	NA	1114.8	2.70818	6.02504e-06	6.35689	0.0182287	20.9439	17.3305	202.01	1.83057	0.00196979	7.14603	5.27035	22.3632	27.8391	744.329
15	63.25	25.25	115	23.5147	17.4636	29.791	19.3226	0.122222	17.7556	26045.3	0.000156377	0.00613499	0.00629136	0	0.000433323	0	0	66.8549	0.00805876	0.0739462	0.0123909	NA	NA	NA	NA	0.0161152	NA	0.00805908	0.0123903	0.00805858	0.101618	0.0299503	NA	0.012397	68.9703	2.70879	0	6.31796	0.0340393	19.9919	17.5639	83.709	1.80095	0	7.74052	5.89859	23.647	28.2002	-15.0042
16	63.25	25.75	114	22.265	15.7627	28.8665	17.129	0.0444444	9.23333	58082.9	4.77577e-05	0.00188004	0.0019278	0	0.0010406	0	0	93.3454	0.00809219	0.172106	0.0778313	NA	NA	NA	NA	0.0637092	NA	0.0734717	0.0372498	0.040762	0.286568	0.563707	NA	0.0905755	223.859	2.82062	0	6.04396	0.0302476	19.2265	15.718	126.232	1.71005	0	6.50552	5.52116	19.2342	24.9611	48.1779
17	63.25	26.25	100	20.4241	13.404	27.3341	16.4194	0.1	11.0333	95536.5	0.00381052	0.0100018	0.0138123	0.00734546	0.0021157	0	0	99.7471	NA	0.114765	0.0578623	NA	NA	NA	NA	0.0740993	NA	0.0367844	0.0933451	0.0313592	0.173066	0.178813	NA	0.0526636	627.501	2.6626	0	9.90581	0.0547451	30.5846	15.6351	182.869	1.81582	0	8.35795	7.87482	24.5751	25.8651	213.667
18	63.25	26.75	81	18.737	11.2736	26.0058	17.3871	0	0	37150.5	0.000119699	0.00648987	0.00660957	0.012278	0	0	0	62.9058	NA	0.028974	0.0225869	NA	NA	NA	NA	0.0743763	NA	NA	0.104502	NA	0.14124	0.0736052	NA	NA	900.876	2.56921	0	5.7376	0.037729	18.0989	18.0913	101.461	1.88085	0	6.02154	5.26329	17.39	30.0517	697.705
19	63.25	27.25	74	17.6672	9.83669	25.3289	15.4194	0.827778	12.9889	11355.8	0	0.000754464	0.000754464	0.0429555	0	0	0	78.9106	NA	0.0396251	0.0737612	NA	NA	NA	NA	0.0241763	NA	NA	0.0917107	NA	0.156133	0.0373731	NA	NA	988.37	2.46045	0	6.79377	0.026817	22.1019	21.7833	217.334	2.07724	0	8.66702	6.2206	26.7169	34.0233	670.993
20	63.25	27.75	60	20.1625	12.1828	28.0172	11.9355	0	0	8935.83	0	0.000669454	0.000669454	0.0104774	0	0	0	97.6152	NA	0.0456411	0.0869429	NA	NA	NA	NA	NA	NA	NA	0.0921261	NA	0.15684	0.0375424	NA	NA	649.354	2.44898	0	2.72897	0.00541626	9.23704	24.9715	99.4472	2.07985	0	2.89149	2.68457	8.13358	36.4872	513.706
21	63.25	28.25	60	20.3126	12.1557	28.3933	7.03226	8.52778	92.2611	6304.83	0	0.00179614	0.00179614	0.00160941	0	0	0	100.544	NA	NA	NA	NA	NA	NA	NA	NA	NA	NA	NA	NA	NA	NA	NA	NA	530.104	2.65246	0	1.84105	0.000138538	6.26819	20.9193	30.8841	1.79912	0	1.61181	2.03647	3.86357	32.016	482.332
22	63.25	28.75	63	19.3031	10.9334	27.61	4.19355	0.0111111	0.0111111	4126.92	0	0.000626531	0.000626531	0.0021837	0	0	0	100.535	NA	NA	NA	NA	NA	NA	NA	NA	NA	NA	NA	NA	NA	NA	NA	NA	691.9	2.72561	0	1.74067	0.000942531	6.17496	14.8356	105.298	1.37571	0	1.68631	1.78839	4.70191	24.4408	512.841
23	63.25	29.25	62	15.0865	6.48098	23.6976	4.16129	0	0	2477.19	0	0.0273132	0.0273132	0.0909224	0	0	0	74.1811	NA	0.481711	0.307121	NA	NA	NA	NA	0.735672	NA	NA	0.213936	0.0181671	0.578512	0.989364	NA	NA	1065.43	2.65084	1.22746e-06	6.65084	0.0196224	21.5116	14.7197	150.871	1.60611	0.0004457	6.54153	5.41304	20.3833	24.7954	798.772
24	63.75	25.75	118	21.3439	14.6849	28.1157	18.5161	0	0	16456.3	0	0.000516742	0.000516742	0	0	0	0	91.5327	0.0123336	0.0776039	0.0591712	NA	NA	NA	NA	0.010248	NA	NA	0.0297196	0.0113529	0.071921	0.0444988	0.136883	0.0214148	379.613	2.83284	0	9.43479	0.0402184	29.4742	14.9647	183.136	1.7422	0	8.8045	7.61743	26.4029	24.0539	46.397
25	63.75	26.25	104	19.7639	12.64	26.8285	15.6452	0.0388889	5.76111	20824.3	0.000145931	0.00100882	0.00115475	0.00545566	0	0	0	100.235	NA	0.0456205	0.055005	NA	NA	NA	NA	0.0150407	NA	NA	0.0631629	0.00856536	0.101254	0.0424668	NA	0.0094807	693.302	2.75427	0	10.5669	0.0593523	32.672	15.4039	168.632	1.82751	0	8.60981	8.29277	25.3226	25.2978	305.135
26	63.75	26.75	80	19.0059	11.4697	26.3875	15.2258	0.416667	15.3889	35627.5	0.000115495	0.00211413	0.00222963	0.000725334	0	0	0	100.362	NA	0.0532696	0.0807115	NA	NA	NA	NA	0.0142137	NA	NA	0.0610698	0.021494	0.122428	0.0588338	NA	0.0340378	887.941	2.75941	0	4.80352	0.0299247	15.331	18.2884	82.0815	1.82826	0	5.03095	4.48768	14.5029	28.7773	735.114
27	63.75	27.25	70	18.0718	10.1433	25.8034	14.7742	1.90556	33.9667	14908	0	6.71737e-06	6.71737e-06	0.0176145	0	0	0	100.365	NA	0.0477394	0.0727267	NA	NA	NA	NA	NA	NA	NA	0.032206	NA	0.103673	0.0481544	NA	NA	894.067	2.7654	0	6.28566	0.0243979	20.3867	19.3465	162.455	1.95495	0	7.74499	5.91671	23.5148	29.6736	642.818
28	63.75	27.75	59	20.0033	11.8287	27.9247	12.9677	2.33889	39.9944	5758.11	0.000512832	0.00524524	0.00575807	0.00833639	0	0	0	100.511	NA	NA	NA	NA	NA	NA	NA	NA	NA	NA	NA	NA	NA	NA	NA	NA	630.077	2.68989	0	3.35532	0.00525719	10.9338	21.0705	54.5623	1.94386	0	3.18678	3.33537	8.6916	32.1065	530.047
29	63.75	28.25	57	19.5894	11.1083	27.7673	10.8387	2.13333	28.1722	2802.13	0	0.00962045	0.00962045	0.00499905	0	0	0	100.492	NA	NA	NA	NA	NA	NA	NA	NA	NA	NA	NA	NA	NA	NA	NA	NA	600.686	2.77856	0	3.64978	0.00469801	11.8221	18.4373	76.5882	1.74977	0	3.55295	3.52399	10.1846	28.7653	509.722
30	63.75	28.75	61	18.007	9.24054	26.507	10.3226	0.0833333	1.46667	11176.4	0	0.00749177	0.00749177	0.012385	0	0	0	100.494	NA	0.0326181	NA	NA	NA	NA	NA	NA	NA	NA	NA	NA	0.0439158	0.0207578	NA	NA	794.811	2.80581	0	2.9407	0.00939156	9.95831	14.2389	118.866	1.43283	0	3.39117	2.91652	10.1145	22.8618	588.012
31	63.75	29.25	62	13.783	4.94366	22.5892	9.6129	0	0	4913.84	0	0.00875728	0.00875728	0.0872931	0	0	0	73.5516	NA	0.981199	0.560125	NA	NA	NA	NA	1.67214	NA	0.014698	0.504377	0.0826848	0.98158	1.92972	NA	0.0122674	1281.57	2.67163	4.88436e-06	12.0255	0.0496343	38.5974	12.924	204.747	1.63953	0.00177355	9.41033	8.11151	29.7515	21.3668	885.876
32	64.25	25.75	124	20.9901	14.2772	27.7523	19.8065	0	0	9812.18	0	0	0	0	0	0	0	92.0017	0.0309574	0.0817779	0.174847	0.122044	0.0295726	0.0189278	0.00808025	0.0391963	0.0591562	NA	0.076685	0.0403135	0.109744	0.13998	0.553163	0.0660246	441.721	2.75336	0	10.4418	0.0474779	32.2842	16.0551	177.759	1.82898	0	9.56962	8.28437	28.5225	26.5837	40.4975
33	64.25	26.25	110	20.2764	13.0895	27.3593	16.2581	0	0	28183.6	0.000127894	0.0374939	0.0376218	0.0103534	0	0	0	100.15	NA	0.072372	0.0537656	NA	NA	NA	NA	0.0507462	NA	NA	0.0924832	0.0117917	0.0714328	0.0793089	NA	0.0161284	757.048	2.83584	0	9.35373	0.0570898	29.1854	14.9252	167.292	1.76164	0	8.55193	7.61907	25.2619	24.5959	438.722
34	64.25	26.75	79	17.8932	10.2818	25.3581	15	0.172222	8.52778	81453.4	0.00424793	0.00718672	0.0114347	0.026984	0.00189084	0	0	99.8778	0.00803947	0.101245	0.165812	NA	NA	NA	NA	0.0399321	NA	0.0241208	0.0405429	0.0259329	0.109095	0.125146	NA	0.0367448	1033.92	2.98655	0	6.12345	0.0377426	19.5703	16.5168	123.27	1.76236	0	6.60748	5.53475	19.552	25.0892	797.053
35	64.25	27.25	67	17.151	9.14756	24.9638	14.7419	0	0	13069.1	0.00105905	0.00290982	0.00396887	0.0201159	0	0	0	100.406	NA	0.102627	0.189246	NA	NA	NA	NA	0.0362601	NA	NA	0.0295609	0.0295594	0.119807	0.138789	NA	0.0415843	1044.36	2.92077	0	7.43605	0.0352438	23.6651	18.9449	196.929	1.96122	0	7.65897	6.51762	22.9212	28.155	670.601
36	64.25	27.75	61	19.4901	11.0634	27.3828	14.2903	0	0	2488.62	0	0.0291213	0.0291213	0.0179663	0	0	0	100.531	NA	0.021491	NA	NA	NA	NA	NA	NA	NA	NA	NA	NA	0.0314071	0.0233515	NA	NA	681.471	2.77982	0	3.73343	0.00684342	12.0251	20.5014	66.7845	1.92642	0	3.37076	3.54473	9.38181	31.0975	561.124
37	64.25	28.25	60	18.1608	9.26363	26.3526	14.129	1.90556	26.2	2571.11	0	0.0170306	0.0170306	0.00436366	0	0	0	100.28	NA	0.0655175	0.0360941	NA	NA	NA	NA	0.0160778	NA	NA	0.0160797	NA	0.120901	0.0683294	NA	NA	734.378	2.75242	5.21479e-05	7.34637	0.0169477	23.6112	16.6796	210.179	1.73156	0.00290462	9.20918	6.52005	28.9081	26.7804	542.922
38	64.25	28.75	60	15.5859	6.42754	24.125	13.3548	0	0	25540.5	0	0.00737246	0.00737246	0.0382962	0.00055645	0	0	100.142	NA	0.176202	0.0948385	NA	NA	NA	NA	0.0394507	NA	NA	0.0339681	NA	0.194269	0.11796	NA	NA	903.99	2.72997	1.30147e-05	5.77528	0.0210625	18.9204	15.8178	153.655	1.69388	0.000969603	7.79571	5.31579	24.3664	25.8955	683.139
39	64.25	29.25	67	13.86	4.78371	22.6583	13.1613	0	0	11614.1	0	0.0143929	0.0143929	0.0723774	0	0	0	70.9656	NA	1.24645	1.01629	NA	NA	NA	NA	4.02127	NA	0.0162569	0.88961	0.173036	1.29325	2.74669	NA	0.0390095	1225.72	2.47264	1.0832e-07	10.6662	0.04619	34.4415	13.4456	195.735	1.65771	6.49919e-05	9.92986	7.61159	31.39	23.8688	916.905
40	64.75	25.75	132	21.0375	14.2456	27.7813	19.7419	0	0	4871.13	0	0.000265162	0.000265162	0	0	0	0	93.2034	NA	0.179499	0.109428	NA	NA	NA	NA	0.111471	NA	0.0846538	0.057947	0.113706	0.198603	0.10373	0.149915	0.0635197	365.573	2.7066	1.31588e-05	9.73391	0.054138	30.4328	15.183	144.77	1.7935	0.00107278	9.37582	7.79636	28.2093	25.7905	52.9447
41	64.75	26.25	120	19.3228	12.0541	26.3919	16.871	0.00555556	3.45556	19082.8	0	0.0233844	0.0233844	0.00842861	0	0	0	100.14	NA	0.0759377	0.0724396	NA	NA	NA	NA	0.0604841	NA	NA	0.0688476	NA	0.0877492	0.104121	NA	0.00806849	730.902	2.79524	2.1664e-07	9.72229	0.0458996	30.7906	14.5674	212.438	1.73547	9.19123e-05	9.35987	7.77637	28.4281	25.1332	392.604
42	64.75	26.75	92	17.6937	10.0555	25.1259	15	0	0	20856.3	0	0.0205373	0.0205373	0.0214374	0	0	0	100.269	NA	0.0437396	0.0458374	NA	NA	NA	NA	0.0285319	NA	NA	0.0418168	0.017457	0.0368914	0.0404069	NA	0.015759	1111.01	2.83849	0	7.40378	0.0419804	23.8846	16.1407	138.753	1.80285	0	7.24759	6.12145	22.0377	26.4623	745.799
43	64.75	27.25	74	16.3623	8.42227	24.1947	15.3548	0.0444444	5.88333	13514.4	5.88613e-05	0.00747947	0.00753833	0.0223781	0	0	0	100.416	NA	0.0165723	0.0137145	NA	NA	NA	NA	0.0215407	NA	NA	0.0362766	0.0175344	0.0389816	0.0400503	NA	0.0174688	1255.8	2.89222	0	7.78178	0.0371888	24.9214	16.2912	169.792	1.81322	0	8.41954	6.71849	25.7302	25.591	766.462
44	64.75	27.75	66	18.1501	9.62608	26.0354	15.1935	0	0	7030.05	0.000171317	0.0273347	0.0275061	0.043551	0	0	0	100.475	NA	0.0286869	0.00807486	NA	NA	NA	NA	NA	NA	NA	NA	NA	0.0305965	0.0319007	NA	NA	825.071	2.88345	0	5.93383	0.0105041	18.8171	19.1476	141.059	1.89776	0	6.20578	5.41318	18.7957	28.8459	603.624
45	64.75	28.25	64	18.5652	9.53194	26.6476	14.9677	1.60556	21.4111	6677.88	0	0.0431587	0.0431587	0.000621951	0	0	0	100.428	NA	0.0361695	0.0147407	NA	NA	NA	NA	NA	NA	NA	NA	NA	0.0473351	0.0265342	NA	NA	728.267	2.75459	0.000210207	6.80766	0.015711	21.7962	17.0226	167.681	1.73629	0.0122189	10.0305	6.4215	31.4403	27.4458	576.233
46	64.75	28.75	66	15.1455	5.81125	23.4942	15.0645	0	0	6366.17	0	0.0140375	0.0140375	0.0221946	0	0	0	98.027	NA	0.772412	0.411504	NA	NA	NA	NA	0.234336	NA	NA	0.167454	0.02138	0.536967	0.440326	NA	NA	952.402	2.70668	6.5925e-05	8.59847	0.0285111	27.7921	17.4311	214.786	1.82569	0.0054948	11.6786	7.21035	36.8198	28.0262	741.59
47	64.75	29.25	72	16.4091	7.10384	25.2084	15.0645	3.5	32.1944	15692.3	0.00563528	0.0124334	0.0180686	0.00763446	0	0	0	90.7412	NA	1.11986	0.894297	NA	NA	NA	NA	1.62193	NA	0.0509889	0.729301	0.175628	1.01171	1.80848	NA	0.0657371	977.01	2.41465	3.68063e-06	6.32991	0.0218871	20.6969	17.2548	186.448	1.70275	0.00061458	9.19839	5.84315	28.9093	30.1195	809.65
48	65.25	25.75	143	21.7142	15.0019	28.4221	16.1935	3.01667	58.2556	4923.52	0	0.00109703	0.00109703	0.0133489	0	0	0	90.2897	NA	0.209772	0.0702111	NA	NA	NA	NA	0.067298	NA	0.106901	0.093189	0.195438	0.308718	0.0823313	NA	0.103542	280.113	2.66454	0.000183041	11.4291	0.0453625	36.3534	14.688	160.864	1.77533	0.00937831	11.7771	8.85891	36.7272	25.2773	42.441
49	65.25	26.25	128	21.3421	14.0761	28.2972	14.2903	2.58889	43.7056	17605.5	0.00333963	0.0118184	0.015158	0.00134907	0	0	0	99.6733	NA	0.0860195	0.055143	NA	NA	NA	NA	0.0782009	NA	0.129534	0.0807809	0.166273	0.19921	0.107088	NA	0.0801758	527.521	2.74158	2.78337e-05	9.10695	0.0481044	29.4311	14.5539	167.201	1.72453	0.00139094	9.25021	7.32677	28.7577	25.6328	213.095
50	65.25	26.75	101	18.8207	11.1544	26.1851	14.3226	0.422222	14.4833	20356.3	0.000276074	0.0107105	0.0109866	0.027565	0	0	0	97.0391	NA	0.281257	0.296164	NA	NA	NA	NA	0.660417	NA	0.839814	0.25132	0.233008	0.383696	0.280545	NA	0.290148	973.762	2.8333	0	9.99662	0.0436113	32.5251	14.3936	198.037	1.72735	0	8.92546	7.43411	28.0911	24.5071	500.481
51	65.25	27.25	85	15.8604	8.00339	23.6299	17.7419	0.144444	6.66111	22134.5	0.000223321	0.0116833	0.0119066	0.0529323	0	0	0	96.6928	NA	0.25957	0.257204	NA	NA	NA	NA	0.525809	NA	0.925566	0.329782	0.248273	0.709678	0.29999	NA	0.52939	1337.69	2.88381	0	7.82343	0.0334586	25.556	14.2365	173.531	1.68362	0	8.05957	6.29582	25.2473	23.0717	886.034
52	65.25	27.75	72	15.8624	7.63759	23.9346	20	0	0	7186.33	0	0.00319818	0.00319818	0.0380725	0	0	0	99.589	NA	0.11269	0.0733452	NA	NA	NA	NA	1.28025	NA	2.67515	0.699062	0.747767	0.218036	0.130231	NA	1.5093	1135.28	2.95952	0	8.65359	0.0249959	27.8891	16.7448	257.779	1.8037	0	8.21737	6.94544	25.4369	25.3578	706.996
53	65.25	28.25	74	18.6905	9.91375	26.8518	19.2581	1.15556	14.7389	17730.8	0.000700481	0.0388035	0.039504	0.0206425	0	0	0	100.144	NA	0.108484	0.0399906	NA	NA	NA	NA	0.100746	NA	0.228957	0.0926876	0.110272	0.103736	0.12968	NA	0.0632089	827.847	2.85852	1.07333e-05	5.76779	0.0130354	18.5502	18.0253	161.403	1.77113	0.00262908	7.22058	5.14976	22.5026	27.495	636.323
54	65.25	28.75	72	14.2046	5.01987	22.4644	19.2258	0	0	59924	0.00158802	0.0211541	0.0227422	0.0283036	0.00120919	0	0	96.3319	NA	1.07196	0.571013	NA	NA	NA	NA	0.550797	NA	0.0215695	0.346827	0.0769024	0.755562	0.987063	NA	0.0296257	1016.29	2.79981	5.62525e-05	10.8993	0.0237831	35.1648	15.7259	282.657	1.74203	0.00651209	12.5702	8.30236	40.0458	25.1246	678.22
55	65.25	29.25	76	16.4765	7.15069	25.0526	19.3548	2.68889	26.3722	4431.48	0.00057969	0.0037103	0.00428999	0.00179647	0	0	0	96.6643	NA	1.27402	0.688349	NA	NA	NA	NA	NA	NA	NA	0.340637	NA	0.897291	1.18286	NA	NA	912.278	2.7212	1.33805e-05	4.72743	0.00844994	15.3067	18.5095	94.7126	1.78095	0.00168619	5.21242	4.13891	15.8801	29.1458	773.412
56	65.75	25.75	157	21.3518	14.5032	27.9999	10.9677	3.4	64.9722	6269.17	0	0.00902438	0.00902438	0.0619447	0	0	0	85.3303	NA	0.347448	0.233214	0.0777586	0.0769186	NA	0.060447	0.347976	0.0261857	0.701967	0.276133	0.39877	1.09933	0.282408	0.950945	0.609518	264.651	2.69305	0.000525397	13.5845	0.0256913	43.4168	15.0262	218.743	1.77548	0.0212662	14.2744	10.1802	45.2311	25.1008	1.35642
57	65.75	26.25	150	21.204	13.8362	28.0874	11.129	1.11667	22.1389	18569	0.00470779	0.0295622	0.03427	0.0667187	0	0	0	93.8595	NA	0.446842	0.344745	NA	NA	NA	NA	0.444907	NA	2.24547	0.413645	0.468419	1.03565	0.529255	NA	0.744747	416.576	2.7552	0.000109526	9.52878	0.0318263	30.7771	14.7636	171.93	1.71616	0.00468613	9.97283	7.54094	31.4796	24.6847	136.605
58	65.75	26.75	117	19.6772	11.9315	26.913	15.9032	0.777778	17.5722	15933.5	0.00146567	0.0104644	0.0119301	0.0384236	0	0	0	75.0687	0.00803472	1.50391	1.22288	NA	NA	NA	NA	3.92399	NA	11.4485	1.0425	1.46016	1.88251	1.22216	NA	1.76266	892.094	2.82129	2.1664e-07	11.623	0.0361161	37.7033	12.9155	261.454	1.67102	9.19123e-05	9.95874	8.12591	31.5448	21.1	410.389
59	65.75	27.25	97	16.6516	8.81047	24.2952	21.4839	0.483333	12.2333	18675.8	0.00407439	0.0216037	0.0256781	0.0707675	0	0	0	71.02	NA	1.54013	1.56373	NA	NA	NA	NA	3.08459	NA	10.9872	1.48354	1.60568	4.27299	1.47279	NA	3.51173	1297.32	2.83052	1.34865e-06	10.7108	0.0310003	34.9539	13.5176	222.994	1.71512	0.000467185	10.3862	7.62729	33.0945	21.9976	767.762
60	65.75	27.75	93	15.2414	7.17714	23.165	26.129	0	0	20786.1	3.58419e-06	0.0283811	0.0283847	0.0706854	0	0	0	88.7072	NA	1.13469	0.685826	NA	NA	NA	NA	0.823889	NA	4.21392	0.64256	1.01902	1.60714	0.540043	NA	1.16921	1447.69	2.79084	3.24959e-07	9.12681	0.0354932	29.5923	14.9933	182.083	1.74892	0.000112569	8.39641	6.88792	26.2684	24.791	860.177
61	65.75	28.25	90	15.4618	7.10508	23.7004	25.6452	0	0	12064.9	0	0.0107644	0.0107644	0.05432	0	0	0	95.8696	NA	0.702654	0.406325	NA	NA	NA	NA	0.329951	NA	1.21711	0.251268	0.330269	0.635415	0.544193	NA	0.256723	1265.06	3.04959	0	8.68468	0.0265861	27.9909	16.3963	275.126	1.72861	0	8.35469	6.88345	26.0575	23.9919	844.616
62	65.75	28.75	92	14.7395	5.89049	23.1325	26.3548	0.111111	3.02222	12220.5	0.00260126	0.00914044	0.0117417	0.0192334	0	0	0	98.3828	NA	0.372388	0.235132	NA	NA	NA	NA	0.164982	NA	0.414741	0.197594	0.110402	0.351636	0.310626	NA	0.115421	1202.26	3.06986	0	7.25737	0.0260997	23.6393	15.0142	208.034	1.6169	0	8.24282	6.0915	25.8548	21.9232	807.38
63	65.75	29.25	89	15.3896	6.35445	24.1147	28.129	0	0	23197.3	0.00365588	0.0153484	0.0190042	0.0144252	0	0	0	99.0706	NA	0.220135	0.154942	NA	NA	NA	NA	0.473787	NA	1.88639	0.132561	0.462014	0.225592	0.229142	NA	0.538933	1074.81	2.89469	4.03663e-06	6.25645	0.0154278	20.0121	17.3155	165.39	1.75865	0.00167646	7.48766	5.48391	23.5621	26.6337	804.49
64	66.25	25.75	187	23.3512	16.5105	30.0624	9.6129	0.677778	20.1889	31273.8	0.0116368	0.0735525	0.0851893	0.0201186	0	0	0	75.6081	0.0831732	0.715367	0.654747	0.042485	0.0453702	0.165327	0.0373181	0.757329	0.0348673	4.79607	0.617979	0.673679	2.0164	0.742563	0.461841	1.3164	180.951	2.70508	2.14675e-05	9.21451	0.0144092	29.4566	16.5056	181.656	1.74816	0.00371814	10.8231	7.74457	34.2309	26.9905	-17.9598
65	66.25	26.25	177	22.2299	14.7741	29.1467	12.8065	0.205556	8.43889	70407.5	0.0341492	0.0683678	0.102517	0.138719	0.000599784	0	0	68.8055	NA	1.50282	1.29183	NA	NA	NA	NA	1.46255	NA	17.9521	1.38748	1.5795	2.4555	1.53291	NA	2.51703	419.069	2.64861	8.75038e-06	11.6396	0.0250619	37.3023	13.7235	238.23	1.65954	0.0024138	11.3922	8.62959	35.9875	22.9424	40.1676
66	66.25	26.75	143	19.3011	11.4963	26.4731	17.9355	0.0722222	5.04444	24392.7	0.0015045	0.0664938	0.0679983	0.164139	0	0	0	30.2387	NA	1.65411	1.59057	NA	NA	NA	NA	3.78827	NA	53.5617	1.48174	1.99216	2.07686	1.37545	NA	2.78394	920.189	2.62822	8.62064e-07	14.0752	0.0394731	45.2716	13.1503	220.767	1.71628	0.000365742	10.1371	8.95994	32.2489	22.3924	359.944
67	66.25	27.25	123	16.2407	8.40307	23.7177	24.5161	0	0	48949.1	0.0238447	0.111753	0.135598	0.114919	0	0	0	28.5798	NA	1.98675	2.09596	NA	NA	NA	NA	3.04756	NA	47.8417	2.05011	2.36205	4.7	1.98183	NA	5.8978	1213.4	2.74628	1.52567e-05	11.9704	0.034593	38.9753	14.0728	207.537	1.74042	0.00312416	10.4224	7.74464	33.5207	23.0708	744.442
68	66.25	27.75	110	15.6158	7.90517	23.6199	28.0968	0.25	7.17778	65979.9	0.0102482	0.0714885	0.0817367	0.162088	0	0	0	51.4298	NA	4.43165	2.12118	NA	NA	NA	NA	2.01775	NA	24.3571	2.14109	4.27219	4.09393	1.82383	NA	3.85095	1445.92	2.68156	1.67131e-05	10.6912	0.0396069	34.9772	13.9217	203.74	1.71691	0.00220526	10.427	7.3496	33.3079	23.6607	1037.43
69	66.25	28.25	108	13.8426	6.02225	22.278	28.6129	0.0777778	2.47778	68102.8	0.0194159	0.0799077	0.0993236	0.090867	1.44715e-05	0	0	73.4537	NA	2.6218	1.59397	NA	NA	NA	NA	2.0203	NA	10.556	1.39569	2.07347	2.49523	2.62097	NA	1.71153	1701.33	2.73808	7.18723e-06	9.83722	0.0344787	32.1144	14.3598	185.048	1.7038	0.00115916	9.97706	7.18592	31.7043	23.9339	1339.81
70	66.25	28.75	113	12.143	4.01154	20.8802	30.1613	0	0	36325.5	0.00863377	0.0810549	0.0896887	0.0611845	0	0	0	89.0213	NA	1.24529	1.24855	NA	NA	NA	NA	0.795366	NA	3.09536	1.03282	0.671021	1.34247	1.40534	NA	0.685994	1880.76	2.8163	2.77308e-06	10.4275	0.0328786	33.7982	14.7978	199.817	1.73161	0.000734432	9.42817	7.51476	29.8555	23.9129	1288.59
71	66.25	29.25	112	12.0667	3.56473	21.0223	33.4516	0	0	21053.6	0.0132825	0.0418267	0.0551092	0.069161	0	0	0	91.9232	NA	0.927521	1.15524	NA	NA	NA	NA	0.541923	NA	2.11664	0.965833	0.530596	0.880948	0.882376	NA	0.619297	1674.14	2.99546	1.2075e-05	9.96807	0.0355832	32.2573	16.3744	279.123	1.8131	0.0031907	8.8813	7.28439	28.0045	24.3833	1060.15
72	66.25	29.75	114	12.9832	4.09362	22.1075	39.871	0	0	74798.7	0.0113386	0.0304997	0.0418384	0.0941571	0.00100786	0	0	66.5777	NA	0.415382	1.06619	NA	NA	NA	NA	0.60938	NA	2.18459	0.927717	0.553576	0.423983	0.41701	NA	0.647443	1531.84	2.87384	1.13465e-05	8.6426	0.0354165	28.0489	15.4833	259.484	1.74135	0.00191318	8.08807	6.54519	25.4461	24.4753	1003.42
73	66.75	25.25	236	24.427	18.1806	31.0187	9.35484	0	0	117403	0.0201286	0.0968468	0.116975	0.100672	0.00192211	0	0	39.5426	0.0948965	2.74913	1.42008	0.063405	0.0905414	0.0851593	0.0317869	1.9571	0.119641	8.14095	1.55449	1.92349	2.57053	2.27243	0.506055	1.64875	80.8707	2.90538	0	3.62068	0.017746	12.1273	17.7011	66.889	1.72504	0	4.42155	3.3311	13.6705	26.9306	-12.5264
74	66.75	25.75	223	23.0447	16.0546	30.0016	9.64516	0.0888889	3.17222	40540.1	0.00803731	0.0484342	0.0564715	0.142222	0.000451769	0	0	53.1068	0.0909906	2.24163	1.44718	0.0530696	0.0932457	0.0886036	0.0299527	1.85396	0.126521	24.0896	1.52269	2.27513	3.61811	1.52123	0.500239	3.71788	194.927	2.8881	0	6.07095	0.0180816	19.9912	16.1493	177.919	1.65361	0	8.20758	5.26312	25.9489	24.4613	13.838
75	66.75	26.25	203	20.8148	13.1794	27.9146	11.2903	0	0	20667.7	0	0.0094185	0.0094185	0.210302	0	0	0	30.8151	NA	1.58456	1.4089	NA	NA	NA	NA	1.78277	NA	53.5779	1.40321	1.79662	3.16762	1.49245	NA	3.5144	538.49	2.67089	0	12.9937	0.0282863	42.0231	13.6656	263.803	1.69108	0	10.6664	8.35002	34.2403	21.2705	46.2408
76	66.75	26.75	176	18.8229	10.9312	26.1337	16.2903	0.183333	4.45	25634.3	0	0.0205311	0.0205311	0.212182	0	0	0	10.4597	NA	0.744515	0.662136	NA	NA	NA	NA	0.926534	NA	83.0944	0.671088	0.919483	1.10053	0.675527	NA	1.28961	841.033	2.54627	6.29371e-06	16.2494	0.0347701	52.3339	12.9291	242.537	1.72225	0.00100922	11.2117	9.70643	35.9464	21.4904	269.127
77	66.75	27.25	156	16.5918	8.62594	23.9642	25.7419	0	0	23403.8	0	0.0998473	0.0998473	0.169305	0	0	0	9.5048	NA	0.908834	0.786115	NA	NA	NA	NA	0.886663	NA	80.7541	0.838675	1.06158	2.07054	0.917943	NA	2.81428	1133.85	2.57356	6.33493e-05	17.166	0.0379022	55.521	12.9181	268.584	1.73491	0.00718452	12.7482	9.96804	41.0695	21.5431	537.86
78	66.75	27.75	145	15.7749	7.95077	23.4933	28.5161	0	0	87302.6	0.00968373	0.0520556	0.0617394	0.157805	0.00151303	0	0	25.7617	0.0322132	4.65761	1.9716	NA	NA	NA	NA	1.80157	NA	50.8158	2.00078	4.81292	2.89119	1.91807	NA	3.88968	1309.98	2.54588	8.97032e-05	16.1002	0.0342691	52.4788	13.6033	241.526	1.76064	0.00937846	14.0589	9.94602	45.2779	23.3433	710.376
79	66.75	28.25	135	13.7509	5.87334	21.9526	29.4516	0.0666667	1.30556	32931.9	0.011562	0.067065	0.078627	0.132899	0	0	0	45.0473	0.0299749	3.60711	2.22174	NA	NA	NA	NA	3.90689	NA	29.322	2.34521	3.48191	3.07252	4.37915	NA	3.15291	1506.77	2.55762	4.2216e-05	15.9168	0.0369543	51.9452	13.4375	340.119	1.75907	0.00622104	13.3396	9.65802	42.9271	23.5563	809.331
80	66.75	28.75	134	10.8412	2.79257	19.2891	29.6129	0	0	45067.8	0.0294536	0.190132	0.219586	0.0534839	0	0	0	79.79	NA	1.94705	1.83781	NA	NA	NA	NA	1.51428	NA	7.17339	1.7269	1.13611	2.03351	2.32418	NA	1.05986	1904.96	2.84135	0.00017797	14.3102	0.0324075	46.9034	13.9511	323.626	1.74821	0.00836288	12.7059	8.92825	40.9882	22.5516	1195.06
81	66.75	29.25	129	10.6974	2.41052	19.5003	31.2581	0	0	62667.1	0.035465	0.165177	0.200642	0.0700651	0.000791655	0	0	79.6327	NA	1.81858	2.83828	NA	NA	NA	NA	1.16451	NA	6.59108	2.1687	1.13843	1.92784	1.91473	NA	1.34765	1939.9	2.82845	0.000192021	13.2654	0.0285366	43.513	15.049	283.776	1.80789	0.00914545	13.0705	8.6389	42.0492	24.163	1310.87
82	66.75	29.75	125	10.7106	2.07095	19.8117	39.2903	0.0777778	1.05	113789	0.0652855	0.149448	0.214734	0.0767857	0.000659579	0	0	76.9309	NA	1.87523	2.4472	NA	NA	NA	NA	1.66283	NA	8.76398	1.92234	1.35828	1.91506	2.09219	NA	1.57529	1764.41	2.86958	0.000109373	10.8673	0.0218379	35.8418	16.2813	280.922	1.82287	0.00897311	12.5497	7.53565	40.6848	25.6214	1256.79
83	66.75	30.25	127	11.3023	2.19237	20.5969	44.3226	0.655556	6.80556	408865	0.0439984	0.0826426	0.126641	0.0843472	0.0113173	0	0	85.2154	NA	1.24421	1.35463	NA	NA	NA	NA	1.13989	NA	6.04322	0.870025	0.922703	1.23992	1.51187	NA	0.998757	1678.58	2.93712	4.86324e-05	7.98092	0.0180355	26.3576	16.9242	227.512	1.84363	0.00397374	8.69067	5.77024	28.0003	25.9379	1301.58
84	66.75	30.75	117	10.6042	1.69566	19.4849	42.8387	0.111111	1.71111	285775	0.0507231	0.0923652	0.143088	0.112494	0.00567133	0	0	80.3706	NA	1.31746	1.7673	NA	NA	NA	NA	0.709177	NA	1.62245	0.75509	0.850333	2.02379	1.17561	NA	0.484161	1868.98	2.9418	7.47407e-06	8.31112	0.0261742	27.2281	14.6736	301.004	1.72699	0.000539812	7.5832	6.06166	23.9892	22.9491	1340.41
85	67.25	25.25	252	23.5867	17.0342	30.7054	9.54839	1.54444	19.6333	434430	0.0143941	0.0811587	0.0955528	0.0832618	0.00910011	0	0	59.9392	0.141108	2.82935	1.69081	0.107503	0.0566521	0.0821057	0.042461	2.28131	0.0827084	15.8819	1.63768	2.77243	2.33337	4.54251	0.359525	2.07679	187.988	2.77184	0	4.48219	0.0187952	15.0969	15.7846	101.714	1.67192	0	5.47865	3.78762	17.1654	25.7102	29.6158
86	67.25	25.75	238	21.9969	14.7975	29.3767	9.54839	0.988889	13.5444	39148.3	0.000178729	0.0234778	0.0236565	0.124683	0	0	0	57.3192	NA	2.18292	1.46067	NA	NA	NA	NA	1.40232	NA	25.5699	1.4176	2.3406	4.00815	1.41763	NA	3.38605	344.26	2.64489	0	8.54619	0.0226726	28.1418	14.5999	164.606	1.72327	0	9.24844	5.9834	29.506	24.2783	107.809
87	67.25	26.25	228	21.2387	13.433	28.7875	9.3871	0.694444	9.83889	36288.8	0.00554876	0.0915263	0.0970751	0.0573492	0	0	0	71.2085	NA	1.14801	1.41787	NA	NA	NA	NA	1.07749	NA	17.2109	1.1015	1.17898	2.46313	1.07122	NA	2.22204	401.369	2.41475	0	9.27913	0.0140514	30.7148	15.1828	216.916	1.7567	0	9.72996	6.18405	31.3282	26.2084	51.5819
88	67.25	26.75	214	20.8099	12.578	28.44	10.0323	0.277778	7.89444	81053.5	0.0130951	0.127125	0.140221	0.0987497	0	0	0	47.1553	0.0527726	1.62992	5.09457	NA	NA	NA	NA	1.61192	NA	35.3325	1.70751	1.7202	2.26789	1.64463	NA	2.28256	452.669	2.39096	2.50443e-05	11.5465	0.0203669	37.5846	14.7533	283.32	1.72813	0.00401594	9.7249	7.21997	30.9103	25.8851	33.3809
89	67.25	27.25	207	18.9875	10.7463	26.5071	15.9032	0.0888889	5.67778	50573.9	0	0.125648	0.125648	0.114123	0	0	0	26.4928	0.0644597	1.92263	7.41093	NA	NA	NA	NA	1.99036	NA	46.8239	2.03736	2.19024	4.47588	1.77214	NA	5.3258	641.002	2.4477	9.54782e-05	14.5669	0.0230724	47.4243	13.8408	349.639	1.71537	0.00855669	11.1013	8.55596	35.4754	23.9049	42.8415
90	67.25	27.75	189	17.7586	9.69816	25.4412	21.3226	0	0	48957.4	0.00526042	0.116022	0.121282	0.13056	0	0	0	22.6656	NA	4.16429	7.05169	NA	NA	NA	NA	2.37225	NA	46.2272	2.67799	5.03478	3.36015	2.07626	NA	4.89153	812.94	2.51477	0.000112784	16.7292	0.0204087	54.8382	14.0874	317.946	1.78457	0.00949313	12.8058	9.24921	41.2821	24.0718	100.561
91	67.25	28.25	168	16.5253	8.36749	24.3105	25.129	0.344444	6.41111	42876.8	0.00877944	0.0986371	0.107416	0.0994216	0	0	0	45.448	0.0161333	3.08515	4.02329	NA	NA	NA	NA	3.80698	NA	28.7491	2.36417	3.37812	2.85741	3.69376	NA	3.12621	790.683	2.47956	5.41824e-05	16.9058	0.0147167	55.2976	14.4842	403.232	1.80006	0.00640041	12.8951	9.2225	41.479	25.3675	58.0493
92	67.25	28.75	161	16.9708	8.75103	25.1493	23.2258	0	0	63553.4	0.0275472	0.148364	0.175912	0.0799545	0.000880554	0	0	66.1097	NA	2.62987	3.34964	NA	NA	NA	NA	2.4982	NA	13.321	2.99001	1.92494	2.59861	3.22763	NA	1.89152	945.626	2.51829	0.000664276	15.8346	0.00823033	51.8533	13.7876	484.109	1.75847	0.0216487	13.2046	8.99696	42.5618	24.3561	66.3341
93	67.25	29.25	154	15.0261	6.64935	23.567	21.7419	0	0	26193	0.0040377	0.169444	0.173482	0.0736619	0	0	0	58.9599	0.00805938	2.39345	3.86601	NA	NA	NA	NA	1.94643	NA	20.6432	3.59075	1.88433	2.39788	2.45137	NA	2.40451	1305.12	2.54258	0.000714529	15.9216	0.0157828	51.9699	13.9351	432.447	1.78816	0.0238721	14.028	9.34827	44.984	24.5652	235.337
94	67.25	29.75	142	13.9097	5.24058	22.6743	30.6452	0	0	51225.4	0.0224031	0.147695	0.170098	0.105151	0	0	0	44.6447	NA	2.03444	3.06581	NA	NA	NA	NA	2.6366	NA	35.5503	2.77323	2.39468	1.96684	2.6538	NA	2.82185	1472.95	2.55132	0.000295977	16.3515	0.0189069	53.3583	13.4922	437.89	1.75483	0.0155782	14.8951	9.71801	48.017	23.8687	374.008
95	67.25	30.25	133	9.15341	0.785741	17.9138	41.3548	0	0	286439	0.0199192	0.169303	0.189222	0.126015	0.00869225	0	0	38.2195	0.0160868	3.6932	2.71031	NA	NA	NA	NA	4.20375	0.0080441	32.8775	2.52717	4.17147	3.2526	4.75463	NA	4.11653	1933.18	2.85087	0.000235725	15.6632	0.0229249	51.2409	14.0915	436.363	1.77945	0.0150129	13.8847	9.00134	44.8799	21.7248	1117.53
96	67.25	30.75	122	9.65217	1.28699	18.3703	43.1613	0	0	163002	0.0326676	0.0829429	0.11561	0.163012	0.0017656	0	0	67.1913	NA	3.78867	2.00182	NA	NA	NA	NA	2.5651	NA	10.6152	2.02832	3.6038	3.66136	2.48606	NA	2.59814	2106.96	2.94009	4.73973e-05	10.4462	0.0343082	34.075	15.1888	339.661	1.78502	0.00297762	8.86346	6.95131	28.1487	23.7847	1462.94
97	67.75	24.25	260	24.9434	19.0538	31.9477	9.87097	593.239	6753.18	219987	0.215626	0.0899439	0.30557	0.0408711	0	0	0	10.6416	0.41128	23.2026	7.03927	0.264026	0.263289	0.203281	0.275223	8.23344	0.560952	8.68418	7.25472	3.6041	2.78553	11.9398	1.16905	3.42117	3.67387	2.61085	0	0.919165	0.00217656	3.73347	23.552	2.34541	1.79328	0	0.946962	1.14235	2.02292	35.165	-23.3213
98	67.75	24.75	262	24.4935	18.1208	31.7879	8.93548	0	0	358541	0.219746	0.110902	0.330648	0.0687373	1.39283e-19	0	0	44.9099	0.18476	13.3195	6.85879	0.115252	0.0568249	0.0967388	0.0773315	4.50004	0.173176	8.47984	4.40325	3.0174	1.23782	9.7165	0.661803	2.62559	46.7859	2.67663	0	1.6029	0.00386316	5.92108	20.3851	49.4891	1.7176	0	1.91701	1.69088	5.54788	31.798	-20.5666
99	67.75	25.25	252	23.4949	16.7802	31.1478	9.19355	0.277778	6.28333	89920	0.000831827	0.0449788	0.0458106	0.0400549	0	0	0	85.6737	0.131697	3.03058	1.85024	0.0909221	0.0103962	0.0895099	0.0409715	1.04787	0.103202	2.38154	1.09101	1.03949	0.886482	2.42223	0.646314	0.897817	179.903	2.63592	0	3.01994	0.0087421	10.3048	17.4546	73.4574	1.72006	0	3.6194	2.87587	10.9744	28.8448	37.0774
100	67.75	25.75	243	22.0924	14.651	29.9201	8.58065	0	0	63961.5	0.00167902	0.0259974	0.0276764	0.0141754	0	0	0	89.2182	0.139174	1.11308	1.94613	NA	NA	NA	NA	0.736721	NA	2.29117	0.812951	0.758992	1.72556	0.889497	NA	1.0264	280.981	2.57895	0	6.22508	0.0110689	20.4021	16.3423	123.211	1.7457	0	6.82871	5.13573	21.1363	27.3727	92.7708
101	67.75	26.25	235	21.8887	13.6971	29.9784	7.87097	589.856	6298.04	184548	0.0970752	0.0772138	0.174289	0.0251447	0	0	0	64.277	0.0972189	1.24183	8.46172	0.0724111	0.0563126	0.072401	0.201142	1.30756	0.128703	15.4882	1.39513	1.33592	1.0679	1.4436	3.14547	1.82485	171.507	2.54883	0	4.87894	0.00748138	16.1451	20.3288	163.855	1.83988	0	6.49036	4.46687	20.2157	32.2453	31.2581
102	67.75	26.75	229	21.8936	13.2234	30.0806	7.64516	597.289	6254.57	706819	0.465844	0.0451361	0.51098	0.027008	0	0	0	35.538	0.036286	2.02086	30.6603	NA	NA	NA	NA	2.31317	NA	19.6783	2.23489	2.13772	0.513588	2.38487	NA	2.46805	63.4316	2.57879	0	1.79535	0.00298277	6.38101	21.6999	38.4708	1.81078	0	2.03776	1.89144	5.52186	33.5425	20.6077
103	67.75	27.25	224	21.9691	13.3391	29.893	8.22581	6.05556	61.7889	730705	0.478144	0.0915791	0.569723	0.0453697	0	0	0	24	0.0803467	1.39307	43.9175	0.0724024	0.0402229	0.056304	0.12067	2.21857	0.0884833	15.5074	2.95413	2.29707	1.67404	1.78589	0.378153	4.17827	56.4959	2.561	0	1.59471	0.00555831	5.7558	21.8785	25.8823	1.78447	0	2.10601	1.9633	5.77192	33.9073	17.2107
104	67.75	27.75	207	22.013	13.5877	29.7186	9.54839	6.23333	62.1111	448398	0.411652	0.130347	0.542	0.0373069	0.000330881	0	0	21.5395	0.0927963	1.57425	41.7166	NA	NA	NA	NA	2.83552	NA	16.5052	5.00044	3.31787	1.17853	1.35205	NA	5.39146	102.254	2.5166	0	2.95245	0.00978065	10.1676	20.6837	152.84	1.78419	0	5.43026	2.98847	16.9408	32.945	23.5744
105	67.75	28.25	190	21.8673	13.536	29.5437	10.1935	6.10556	58.3889	182347	0.473123	0.0855178	0.55864	0.0218709	0.0014237	0	0	52.472	NA	1.13019	22.9016	NA	NA	NA	NA	2.79243	NA	10.8575	2.76411	2.25917	1.03848	1.51109	NA	2.81703	73.6285	2.54981	0	1.98505	0.00276242	6.82703	20.8399	45.9819	1.78255	0	2.60988	2.18297	7.4213	32.8421	33.7829
106	67.75	28.75	174	21.6394	13.3025	29.4275	11.3226	5.09444	42.2056	82382	0.128543	0.426134	0.554677	0	0	0	0	88.2765	NA	0.726006	4.22002	NA	NA	NA	NA	0.818871	NA	2.73554	0.938703	0.629888	0.6338	0.85677	NA	0.7074	87.9108	2.5806	0	2.33168	0.00105437	7.73681	19.8893	36.5503	1.75978	0	3.21083	2.57812	9.63785	31.7993	44.5057
107	67.75	29.25	160	20.9365	12.4523	28.8662	11.9032	3.04444	18.6556	136748	0.152527	0.208029	0.360555	0.00095597	0.00122111	0	0	86.3101	NA	1.24065	1.9308	NA	NA	NA	NA	0.856992	NA	4.76696	1.71414	0.753008	1.06218	1.11418	NA	0.79457	182.152	2.54073	0	4.75423	0.0063191	15.5905	17.9958	132.001	1.74781	0	7.0517	4.46644	22.4128	30.1726	73.0332
108	67.75	29.75	150	19.2095	10.5853	27.3207	16.1935	2.2	11.9111	75587.9	0.0386771	0.0836156	0.122293	0.128182	0.0015427	0	0	42.8624	NA	1.5486	2.57449	NA	NA	NA	NA	2.35891	NA	41.2656	2.71951	1.76922	1.53194	2.17548	NA	1.73737	574.145	2.5008	3.04389e-05	12.4037	0.0168095	40.0388	13.9155	321.695	1.68895	0.0049503	11.4472	8.2537	36.4133	24.5797	115.02
109	67.75	30.25	138	10.6958	2.24644	18.8719	31.5484	0.322222	2.42222	77465	0.0268223	0.193262	0.220084	0.12039	0.000352741	0	0	17.6231	NA	3.16461	2.3852	NA	NA	NA	NA	3.9684	NA	55.4353	2.65013	5.03051	1.99173	3.24378	NA	5.05075	1778.74	2.52054	0.000323197	17.6631	0.0265185	57.3264	12.4674	508.998	1.71235	0.016875	13.775	9.53857	44.0574	21.2376	696.243
110	67.75	30.75	123	8.60543	0.718504	16.8666	39.3226	0	0	78297.1	0.0111796	0.0797408	0.0909204	0.184534	0.000111607	0	0	46.6412	NA	4.51164	2.57494	NA	NA	NA	NA	5.21584	NA	20.92	3.26069	5.35596	4.93934	2.79415	NA	4.32895	2213.06	2.59646	7.6557e-05	13.2056	0.0385324	42.7679	15.2011	332.708	1.85497	0.00404837	11.0305	8.22292	35.0334	25.7493	1494.4
111	67.75	31.25	116	8.61942	1.1819	17.0072	44.871	0	0	38477.7	0.00216028	0.040161	0.0423213	0.145627	0	0	0	64.5104	NA	1.01599	0.634383	NA	NA	NA	NA	1.34105	NA	2.6828	0.78259	1.14349	1.74325	0.641064	NA	0.941408	2258.37	2.83546	1.0832e-07	7.66561	0.0353369	24.6293	18.4148	175.039	1.97956	6.49919e-05	7.60855	6.01178	23.3829	29.2138	1907.56
112	68.25	24.25	255	24.7038	18.3864	32.1754	11.8065	0	0	127814	0.196952	0.044066	0.241018	0.0451584	0	0	0	13.8176	0.392464	16.9345	6.64445	0.198194	0.182538	0.206151	0.140282	8.00243	0.47431	14.0599	6.23533	3.43672	2.06305	11.1251	1.64361	3.44433	4.63555	2.59421	0	1.00524	0.00235967	3.9524	24.5764	2.58156	1.78754	0	1.08042	1.27828	2.42157	36.1364	-26.035
113	68.25	24.75	252	24.6127	18.0557	32.381	9.67742	600.533	6670.43	481483	0.448293	0.0519474	0.500241	0.0458135	0	0	0	12.8343	0.316538	22.9838	17.2035	0.174576	0.146707	0.221378	0.153779	4.60817	0.29827	8.34076	4.84968	3.71793	0.843672	21.4435	2.83833	3.10898	13.169	2.59289	0	1.13222	0.00242926	4.34332	23.5371	8.43827	1.78571	0	1.11769	1.32546	2.64855	35.3575	-15.4303
114	68.25	25.25	247	24.514	17.7037	32.4601	9.32258	600.433	6565.79	1.38381e+06	0.203545	0.0576355	0.26118	0.0444155	0.0329938	0	0	50.793	0.0877909	11.4736	9.33528	NA	0.0290135	NA	NA	2.29242	0.0482256	5.96322	2.68666	2.79108	0.845859	11.191	NA	2.64131	49.9869	2.52146	0	1.89761	0.00283367	6.67439	20.2536	31.7062	1.76011	0	2.18958	2.03165	6.21348	32.6538	-11.2995
115	68.25	25.75	235	23.5332	15.8978	31.9251	8.64516	601.744	6470.08	392297	0.197367	0.0771987	0.274565	0.0787488	1.56029e-19	0	0	50.6657	0.163808	4.98266	16.0057	NA	NA	NA	NA	2.04948	NA	11.2832	2.76935	2.40931	1.16581	4.95586	NA	4.0902	69.6589	2.44338	0	2.46003	0.0028013	8.33729	20.1151	49.7697	1.80972	0	3.01854	2.66921	8.71023	33.0875	2.69824
116	68.25	26.25	221	22.2252	13.6983	31.1075	7.64516	0.0222222	1.46111	922557	0.552837	0.0380793	0.590916	0.0520069	0	0	0	14.9426	0.0971253	3.01631	39.0815	NA	NA	NA	NA	2.8474	NA	26.0297	3.05253	2.9555	0.503862	4.35238	NA	3.66453	43.0542	2.56915	0	1.82981	0.00323505	6.34145	20.7801	21.1896	1.81171	0	2.00404	1.99681	5.5406	32.7898	9.38436
117	68.25	26.75	223	21.6172	12.8292	30.4046	7.54839	0.0166667	0.938889	838141	0.561632	0.0339872	0.59562	0.0494802	0	0	0	11.0509	0.0727314	3.30456	55.3613	NA	NA	NA	NA	2.36657	NA	16.7632	2.20159	2.31848	0.248131	4.48335	NA	2.37983	43.2898	2.64334	0	1.49799	0.00395431	5.49361	20.8069	6.54604	1.79162	0	1.27021	1.49733	3.18192	32.2042	18.2491
118	68.25	27.25	218	22.0756	13.624	30.4036	7.64516	590.939	6155.81	918679	0.542494	0.0617398	0.604233	0.055781	0	0	0	6.22013	0.0365218	2.9585	63.3044	NA	NA	NA	NA	2.23867	NA	11.815	2.97318	2.1839	0.415423	4.00318	NA	4.39705	50.5052	2.65728	0	1.12948	0.00462508	4.39812	21.9023	5.857	1.79705	0	1.05625	1.25059	2.44268	33.2127	23.7454
119	68.25	27.75	219	22.262	14.1428	30.0656	7.93548	600.822	6124.83	1.02759e+06	0.589196	0.0291683	0.618364	0.0504406	0.016662	0	0	1.00087	0.0377027	1.75869	73.8858	NA	NA	NA	NA	2.39447	NA	7.92067	4.64192	2.22297	0.134869	2.40713	NA	4.15002	52.8224	2.65484	0	0.985887	0.00335787	3.91286	22.1719	3.74905	1.80911	0	0.880549	1.1271	1.78505	33.5208	24.1203
120	68.25	28.25	209	22.1059	14.1668	29.7634	8.90323	0	0.0166667	635831	0.61111	0.0212649	0.632375	0.0474938	0.0070292	0	0	6.07925	NA	0.511833	74.8097	NA	NA	NA	NA	3.05635	NA	5.40956	4.01355	2.57986	0.165065	1.28423	NA	2.62951	58.5074	2.63194	0	1.09608	0.00197938	4.15648	21.4541	6.62015	1.77901	0	0.882905	1.21652	1.72398	32.9207	35.1173
121	68.25	28.75	186	21.7958	13.6735	29.4536	9.45161	0.105556	2.89444	157459	0.238103	0.288739	0.526842	0.00956383	0.00245649	0	0	79.1549	NA	0.287829	14.9855	NA	NA	NA	NA	1.01912	NA	1.96174	1.04514	0.717673	0.271439	0.49083	NA	0.609297	119.133	2.69749	0	2.39476	0.00189632	7.94909	19.2625	49.0748	1.73601	0	2.29724	2.52761	5.98567	30.0875	45.5297
122	68.25	29.25	164	20.1233	11.7916	27.7997	10.6129	1.24444	18.5333	38628.4	0.0452718	0.15294	0.198212	0.0514886	0	0	0	84.3	NA	0.827149	2.28089	NA	NA	NA	NA	0.70766	NA	7.43128	1.97168	0.752881	0.789132	0.85149	NA	0.631373	267.171	2.84291	0	5.84261	0.00723197	18.8012	17.9541	146.006	1.75829	0	7.15415	5.23851	22.147	27.075	90.0112
123	68.25	29.75	160	17.0096	8.59886	24.6915	15.0645	1.08889	8.33889	31949.1	0.0186334	0.098457	0.11709	0.124279	0	0	0	37.3514	NA	1.79835	3.78243	NA	NA	NA	NA	3.41567	NA	40.6475	3.84361	2.36593	1.829	2.97193	NA	2.53776	680.49	2.72437	2.14665e-05	12.8169	0.0171044	41.4444	14.5723	348.572	1.74008	0.00371805	11.497	7.92909	36.4189	22.7125	162.275
124	68.25	30.25	144	11.9403	3.72661	19.6302	26.0323	0	0	54837.2	0.0119355	0.160336	0.172271	0.104643	0	0	0	42.6821	NA	3.55494	2.52041	NA	NA	NA	NA	4.45488	NA	30.4566	2.44628	3.86018	2.79719	4.16457	NA	3.60461	1642.88	2.34229	0.000101772	13.8534	0.0362744	44.6293	13.692	351.551	1.73057	0.00878259	13.4537	8.41069	42.0836	25.7758	736.343
125	68.25	30.75	128	12.2764	4.32478	20.2543	31.129	0.111111	1.51111	53783.8	0.0187845	0.0663015	0.085086	0.16936	0.000321204	0	0	56.7468	0.00913005	5.14488	2.75569	NA	NA	NA	NA	5.92406	NA	10.5803	3.29206	4.64848	5.57489	2.75856	NA	3.11181	1883.27	2.36047	2.50646e-05	10.3581	0.0348263	33.3291	15.7879	279.277	1.81122	0.00297364	10.7084	7.21768	33.3834	28.5384	1389.44
126	68.25	31.25	116	11.1932	3.66368	19.3094	25.9355	0	0	15144.4	0	0.0622361	0.0622361	0.120216	0	0	0	87.6855	NA	1.39268	0.965373	NA	NA	NA	NA	1.79893	NA	1.66622	1.23083	1.15296	2.64995	0.874728	NA	1.12507	2094.55	2.66362	4.31032e-07	8.31007	0.0352141	26.6152	17.062	154.103	1.89352	0.000258619	8.78236	6.67357	26.9027	29.244	1816.06
127	68.25	31.75	110	10.9767	3.69944	19.0364	30.0645	0	0	13893.6	0	0.0400999	0.0400999	0.235759	0	0	0	41.3374	NA	0.137008	0.149287	NA	NA	NA	NA	0.166656	NA	0.14625	0.157305	0.0863353	0.35644	0.112594	NA	0.143637	2077.86	2.7928	0	4.66518	0.0211698	15.4919	16.7674	74.2208	1.7748	0	5.33287	4.03653	16.5612	28.052	1903.08
128	68.75	24.25	248	24.3306	17.489	32.2376	11.0968	73.1389	1346.45	83673.7	0.0980163	0.0129067	0.110923	0.0199352	0	0	0	16.1054	0.747528	7.20374	5.58435	0.351964	0.437781	0.482148	0.309921	4.93469	0.944098	13.9298	3.64699	2.53302	1.31164	7.0375	7.96048	2.65287	4.81048	2.6001	0	1.5964	0.00537579	5.55403	27.2276	4.7747	1.77486	0	1.58751	1.85801	4.04306	38.5737	-28.2558
129	68.75	24.75	235	24.22	17.1763	32.5306	10.0323	0.0722222	4.16111	572027	0.496987	0.0563189	0.553306	0.0410864	0	0	0	18.2168	0.811937	27.8987	18.7178	NA	NA	NA	NA	3.22746	NA	7.93223	3.36831	2.49618	0.267155	27.1132	NA	1.77152	10.3267	2.62191	0	1.14964	0.00348764	4.36122	23.2221	3.62293	1.79566	0	1.07373	1.32769	2.40719	34.6882	-14.0179
130	68.75	25.25	227	24.2494	16.9115	32.837	9.29032	0.05	2.66111	927614	0.610786	0.00450277	0.615288	0.0497404	0	0	0	0.0957301	0.0371356	32.0187	22.771	NA	NA	NA	NA	2.94344	NA	6.69252	4.05702	3.85881	0.0158093	24.7141	NA	3.3697	17.3049	2.60565	0	1.08658	0.00312217	4.19323	21.728	3.70829	1.80273	0	0.941491	1.20264	2.07629	33.36	-2.6338
131	68.75	25.75	217	23.5346	15.587	32.4824	8.6129	0.0222222	1.83333	863830	0.641113	2.84626e-06	0.641116	0.0573688	0	0	0	0.739956	0.0662274	16.5819	40.6936	NA	NA	NA	NA	3.11448	NA	11.422	4.44073	3.38543	0.143612	13.8145	NA	6.26467	21.8876	2.60996	0	1.1016	0.00232782	4.24945	21.9276	3.12688	1.80826	0	0.96864	1.23181	2.12877	33.5426	-1.45821
132	68.75	26.25	209	22.4244	13.9101	31.6069	7.90323	0.0944444	3.58889	487179	0.420218	0.0631234	0.483341	0.0635829	0	0	0	25.7612	0.0617426	6.5487	24.4268	NA	NA	NA	NA	2.73633	NA	24.7946	2.96012	2.6021	0.853658	5.56538	NA	4.22565	31.69	2.64597	0	1.82584	0.00629064	6.44542	20.2929	7.76912	1.7778	0	1.69155	1.86232	4.54764	31.7467	4.34279
133	68.75	26.75	213	21.911	13.3382	30.7783	7.29032	0	0	104931	0.0531762	0.0647797	0.117956	0.0209959	0	0	0	67.4603	0.0594884	2.16942	8.65047	NA	NA	NA	NA	1.37199	NA	13.9283	1.46621	1.33796	0.647741	1.70473	NA	1.79439	48.6483	2.66155	0	3.17239	0.00697788	10.7352	17.2834	11.1936	1.73797	0	2.30413	2.61751	6.68874	28.2074	10.3165
134	68.75	27.25	210	22.1388	13.9391	30.4791	7.19355	0	0	453836	0.295306	0.0409926	0.336298	0.0339588	0	0	0	44.275	0.104455	2.64823	36.5409	NA	NA	NA	NA	1.4651	NA	5.02955	2.01569	1.55358	0.828265	3.77046	NA	2.34168	60.7323	2.65672	0	2.35269	0.00607496	8.03482	18.982	16.4608	1.77564	0	2.00003	2.25669	5.52923	30.2818	24.6203
135	68.75	27.75	213	22.4275	14.7024	30.1738	7.67742	601.917	6104.58	1.29566e+06	0.468274	0.095329	0.563603	0.0507641	0.0177406	0	0	7.7565	0.231407	5.79758	58.2376	NA	NA	NA	NA	2.78795	NA	5.973	4.76634	2.96567	0.369242	7.46566	NA	4.20614	62.0619	2.65642	0	1.40548	0.00431473	5.12345	21.131	6.74775	1.80238	0	1.19389	1.51201	2.81147	32.5671	29.5802
136	68.75	28.25	212	22.1702	14.3053	29.7211	9.03226	0	0	689171	0.560109	0.0440241	0.604133	0.0495578	0.00102	0	0	11.0246	0.25633	1.8753	64.1126	NA	NA	NA	NA	4.02489	NA	4.57184	4.75391	3.37567	0.371251	3.81106	NA	2.5053	66.1621	2.65287	0	1.12809	0.0027246	4.31013	21.1052	14.3412	1.75313	0	0.961377	1.24865	2.08912	32.4566	34.1993
137	68.75	28.75	194	20.8951	12.8859	28.433	9.3871	0	0	66488.1	0.0356048	0.0637155	0.0993203	0.0240269	0.000910721	0	0	78.1711	NA	0.437646	13.3109	NA	NA	NA	NA	1.67992	NA	3.48185	1.34026	1.26735	0.367475	0.933511	NA	0.572741	264.754	2.73151	0	3.95628	0.00502767	13.237	16.9298	169.426	1.68448	0	5.30078	3.92194	16.1252	26.6819	52.6608
138	68.75	29.25	173	16.6766	8.67968	24.0734	13.0645	0.955556	14.5556	36249	0	0.0750505	0.0750505	0.0665019	0	0	0	78.0616	NA	1.00618	2.24572	NA	NA	NA	NA	0.700933	NA	14.0158	1.98036	0.616639	0.895443	1.01262	NA	0.562252	663.665	2.78993	0	10.028	0.0169112	32.4032	14.7165	229.949	1.7285	0	8.80383	7.06926	27.249	22.8102	190.573
139	68.75	29.75	152	15.3281	7.26856	22.6491	20.1935	0.755556	5.11111	38997.6	0	0.0576299	0.0576299	0.115148	0.000593685	0	0	51.8877	NA	2.07828	3.93515	NA	NA	NA	NA	3.02762	NA	27.0635	3.55032	1.6881	2.27254	3.26391	NA	1.77639	991.528	2.67715	3.14685e-06	12.167	0.0252554	39.1798	14.5514	224.379	1.80348	0.000713633	10.604	7.5908	32.9939	23.9622	426.507
140	68.75	30.25	141	13.4621	5.44114	20.7694	27.8387	0.5	3.98333	135348	0.0497699	0.102849	0.152619	0.0496481	0.00204485	0	0	47.2932	0.0160882	3.31531	2.48335	NA	NA	NA	NA	3.75128	NA	28.8382	2.36285	3.07072	2.81644	4.08155	NA	2.51914	1334.79	2.52446	7.58239e-07	9.44646	0.032177	30.3693	14.5326	231.392	1.73197	0.000171951	10.1138	6.80667	30.912	26.0555	843.209
141	68.75	30.75	139	13.1254	5.28515	20.6687	26.2258	0.255556	2.10556	39369.2	0.0120718	0.102171	0.114243	0.109375	0	0	0	62.146	NA	4.3006	1.82703	NA	NA	NA	NA	2.52614	NA	15.231	1.53491	4.10946	3.92524	2.00348	NA	2.93708	1634.88	2.62642	0	8.11097	0.0336784	26.0275	16.3239	211.349	1.81108	0	9.43486	6.26657	29.1022	27.784	1343.52
142	68.75	31.25	135	12.267	4.6215	19.8506	20.1935	0.272222	0.955556	24729.5	0.00247407	0.132228	0.134702	0.116275	0	0	0	72.279	NA	2.23069	1.62165	NA	NA	NA	NA	2.75523	NA	8.13843	1.80823	2.02406	4.81358	1.65803	NA	3.21461	1907.58	2.77684	4.49551e-07	10.1297	0.0327087	32.9306	15.8587	184.655	1.81733	0.00026973	10.1379	7.47591	32.1329	27.1865	1556.66
143	69.25	24.75	231	23.7305	15.9545	32.5597	10.4839	46.0944	676.822	400764	0.434703	0.0521814	0.486885	0.0579842	0	0	0	1.17941	NA	8.90267	12.6536	NA	NA	NA	NA	5.34468	NA	40.0803	4.97507	5.82971	0.119317	11.3694	NA	4.40588	15.4826	2.7711	0	2.12839	0.01161	7.36606	19.8339	8.71476	1.79294	0	1.64612	2.00096	4.44489	31.1752	-23.3142
144	69.25	25.25	212	23.5488	15.4998	32.8739	10.0323	45.5444	657.633	589389	0.602937	1.49787e-09	0.602937	0.0496816	0	0	0	0.21881	0.0160746	15.0945	14.2957	NA	NA	NA	NA	5.74632	NA	30.0162	6.70818	7.17267	0.0532264	13.0021	NA	8.2886	14.6928	2.65786	0	1.28594	0.00410836	4.87837	21.55	5.413	1.80412	0	1.16398	1.36472	2.83704	33.0513	-11.2927
145	69.25	25.75	207	23.1216	14.7015	32.6541	9.64516	46.3444	650.717	577973	0.540345	0.00638255	0.546727	0.0549729	0.0125496	0	0	8.26571	NA	14.7559	12.8739	NA	NA	NA	NA	4.13693	NA	28.1782	5.62743	4.78985	1.34795	11.4005	NA	9.99426	19.313	2.67671	0	1.35575	0.00722074	5.21642	21.8209	5.8245	1.7886	0	1.25595	1.39179	3.34464	33.5105	-13.5088
146	69.25	26.25	199	22.4548	13.8051	31.7983	9.09677	42.3	571.256	100538	0.0736083	0.0351846	0.108793	0.0581807	0	0	0	61.5184	0.0241888	5.25633	6.13715	0.00806407	NA	0.0241977	NA	1.71212	0.0403258	12.5979	1.96507	1.85023	1.68483	4.14906	NA	3.60089	38.0239	2.73499	0	2.82779	0.00884739	9.54348	18.7825	11.2777	1.74952	0	2.0974	2.56075	5.72512	30.0686	-11.3608
147	69.25	26.75	201	22.0729	13.4608	31.0213	7.16129	41.6444	559.783	37776.2	0	0.00255218	0.00255218	0.010444	0	0	0	79.7807	NA	1.47999	1.46794	NA	NA	NA	NA	0.683793	NA	6.02727	0.690517	0.563443	0.601546	0.964844	NA	1.07061	53.3981	2.73123	0	3.90168	0.00817301	12.7928	16.5324	11.4019	1.72152	0	2.45878	3.12006	6.94522	26.9895	13.8969
148	69.25	27.25	197	22.0332	13.7725	30.5023	6.74194	40.6889	530.333	93413.3	0.0732845	0.021445	0.0947295	0.00586994	0	0	0	74.695	NA	1.85636	3.85271	NA	NA	NA	NA	1.35503	NA	5.29771	1.25581	1.50012	1.87012	2.10169	NA	2.83423	62.0109	2.65377	0	3.07789	0.00496842	10.3804	17.4045	11.6447	1.75706	0	2.07678	2.54891	5.91357	28.4828	29.9572
149	69.25	27.75	199	22.1166	14.1745	30.1444	7.29032	0	0	559761	0.439563	0.0789685	0.518531	0.0432929	0	0	0	20.1272	0.594767	5.64419	48.3714	NA	NA	NA	NA	2.8167	NA	4.58701	3.65493	3.04748	1.08386	7.33866	NA	3.65253	65.6988	2.65188	0	1.80626	0.00517213	6.3103	20.3601	5.77735	1.79184	0	1.3084	1.75816	3.22052	31.8859	38.694
150	69.25	28.25	205	21.9865	13.9312	29.8117	8.12903	581.7	6042.42	608768	0.468486	0.12066	0.589146	0.0419884	0	0	0	21.5127	0.604622	2.71703	53.6325	NA	NA	NA	NA	3.60201	NA	3.22734	4.24121	2.96825	0.719016	4.91409	NA	2.40682	76.5075	2.64894	0	1.20507	0.00587951	4.57698	21.0044	18.3016	1.72029	0	1.06065	1.30378	2.53644	32.6278	42.2929
151	69.25	28.75	208	20.2332	12.1349	27.8011	10.0645	0	0	41287.9	0.00231772	0.0530397	0.0553574	0.0291741	0.000433672	0	0	85.9408	0.62249	0.491658	9.7115	NA	NA	NA	NA	3.41235	NA	2.7926	0.897572	2.66769	0.264926	0.884639	NA	0.418432	321.884	2.64851	0	4.1268	0.00804397	13.8534	16.1143	158.108	1.64864	0	5.22029	3.81564	15.7227	26.6269	96.7556
152	69.25	29.25	189	16.923	9.10006	24.1511	16.129	0	0	56511.4	0.00432219	0.0592819	0.0636041	0.048397	0	0	0	72.8067	NA	0.622988	1.59713	NA	NA	NA	NA	0.669896	NA	24.2505	1.90054	0.66854	0.535405	0.672292	NA	0.592359	765.255	2.66539	0	7.60592	0.019889	24.7735	15.5343	136.623	1.78332	0	7.69608	5.83668	23.65	25.8882	313.688
153	69.25	29.75	166	14.5766	6.88753	21.6242	20.8065	0	0	74527.3	0.0244921	0.126323	0.150815	0.0941222	0	0	0	45.9199	NA	2.2309	3.19786	NA	NA	NA	NA	3.36181	NA	33.0598	3.18257	1.89598	2.20275	3.54125	NA	1.94916	1099.72	2.8031	1.25221e-05	9.84525	0.0329034	31.9284	15.1753	176.413	1.81164	0.00283973	9.72496	6.86126	30.1599	24.7524	690.989
154	69.25	30.25	151	14.844	7.12852	21.9435	24	0	0	50744	0.0388843	0.153615	0.192499	0.117237	0	0	0	22.5448	NA	2.71932	2.3277	NA	NA	NA	NA	3.87219	NA	54.461	2.18027	3.51352	2.35042	3.46327	NA	3.11075	1264.68	2.8413	3.01722e-06	8.55179	0.0273029	28.032	14.4367	163.352	1.71166	0.000684236	9.09782	6.11423	28.6208	23.5542	916.622
155	69.25	30.75	145	13.846	6.1175	21.0856	22.0968	0	0	43699.1	0.0525447	0.147631	0.200175	0.120653	0	0	0	28.4343	NA	3.31053	1.60556	NA	NA	NA	NA	2.92059	NA	50.0775	1.5926	4.19118	2.66139	1.8226	NA	3.9273	1543.09	2.80929	0	8.57127	0.0395562	27.8731	15.0725	163.681	1.74438	0	8.74351	6.35463	27.5322	25.1861	1239.61
156	69.25	31.25	144	13.4747	5.77872	20.7999	18.4516	0.85	3.65556	93249.9	0.0272185	0.141437	0.168656	0.138357	0.00194889	0	0	26.6829	NA	2.44803	2.21945	NA	NA	NA	NA	6.77232	NA	42.5003	2.49777	3.62544	5.01989	2.16123	NA	6.6162	1713.48	2.77442	1.78888e-06	10.8343	0.0405125	35.5406	15.1565	232.622	1.79961	0.00107333	10.1361	7.37929	32.5081	25.6845	1286.65
157	69.25	31.75	140	12.6276	5.10527	19.8374	18.2258	2.95556	5.94444	22925.7	0.0051955	0.0913211	0.0965166	0.313831	0	0	0	34.1935	NA	1.29145	1.29093	NA	NA	NA	NA	4.70038	NA	14.4258	1.33548	1.89201	1.92393	1.25001	NA	2.52533	1548.22	2.5877	4.31032e-07	13.8678	0.0391445	45.3055	15.034	330.586	1.85763	0.000258619	11.7764	8.52682	37.9691	26.3171	1011.01
158	69.75	24.25	242	23.9899	15.8648	32.6826	14.2258	29.3056	579.128	48225.1	0.0123162	0.0966596	0.108976	0.0168435	0	0	0	11.7503	NA	0.807419	1.44696	NA	NA	NA	NA	1.05189	NA	52.8079	2.13957	1.11287	0.760709	0.624931	NA	1.10568	27.1724	2.99716	0	3.59036	0.0404545	12.0551	16.4846	18.3904	1.7352	0	2.4238	2.8925	6.96326	27.11	-22.0042
159	69.75	24.75	211	23.2649	14.8426	32.4009	10.6452	0	0	103077	0.00819562	0.222816	0.231012	0.0927729	0	0	0	2.29261	NA	0.510922	1.31667	NA	NA	NA	NA	1.72534	NA	83.7766	1.32365	1.98858	0.233035	0.600564	NA	2.13779	42.7209	3.07719	0	3.66589	0.0406717	12.3576	16.695	19.3484	1.73542	0	2.51011	2.98013	7.2531	27.4057	-6.65976
160	69.75	25.25	209	23.0523	14.1934	32.7227	10.3226	1.01667	11.6611	379759	0.239689	0.0985522	0.338242	0.0712797	0	0	0	1.23927	NA	1.5979	5.88817	NA	NA	NA	NA	3.27422	NA	71.4551	4.20933	4.05922	0.366363	1.8297	NA	6.6243	31.7893	2.91619	0	2.55517	0.0210998	8.93775	18.8037	16.569	1.77092	0	2.02058	2.21502	5.98579	29.9887	-7.32877
161	69.75	25.75	201	22.7466	13.7251	32.559	10.0968	2.15556	28.3222	119360	0.0332387	0.02962	0.0628587	0.105685	0	0	0	26.2981	NA	3.69951	4.34509	NA	NA	NA	NA	2.34893	NA	40.0286	2.63387	3.30234	4.37011	2.7116	NA	6.26121	35.0663	2.95108	0	3.09955	0.0196633	10.7255	17.9286	14.645	1.73021	0	1.95632	2.51364	5.74438	29.5456	-5.48118
162	69.75	26.25	182	22.3028	13.3825	31.7341	9.09677	0.916667	19.6778	53589.5	0	0.000188445	0.000188445	0.0200278	0	0	0	73.9626	NA	1.28121	1.27803	NA	NA	NA	NA	0.997666	NA	8.47226	0.865853	1.17246	2.76059	1.0234	NA	2.24327	52.6524	2.83829	0	3.54144	0.00929987	11.798	17.4438	11.5693	1.75399	0	2.2023	3.07984	5.8502	28.7423	8.75819
163	69.75	27.75	195	21.786	13.5423	30.3357	5.96774	40.7722	508.822	178470	0.19325	0.0123988	0.205648	0.0185556	0	0	0	43.3386	NA	3.2335	31.6745	NA	NA	NA	NA	1.57689	NA	3.99892	1.85745	2.12661	0.900356	4.32787	NA	2.46094	71.2363	2.71169	0	1.70296	0.00342267	6.20533	19.5729	5.61832	1.77828	0	1.18749	1.50562	3.20598	30.8001	49.2176
164	69.75	28.25	199	21.5627	13.3224	29.8646	7.25806	577.783	6019.61	746949	0.584662	0.0420186	0.626681	0.0406957	2.73347e-20	0	0	18.0241	0.0870107	2.06274	61.2289	0.00806939	NA	NA	NA	3.06788	NA	2.41307	3.27507	2.42801	0.877513	4.0824	NA	1.99869	77.2271	2.6491	0	1.28733	0.00558473	4.77227	21.284	8.66037	1.75866	0	1.03019	1.3616	2.3547	32.9686	44.3709
165	69.75	28.75	203	20.94	12.7329	29.0521	9.58065	0.505556	9.20556	91828.1	0.0725956	0.0797589	0.152354	0.0253144	0	0	0	74.1096	0.0961076	0.864244	18.3521	NA	NA	NA	NA	1.23917	NA	1.04406	1.4059	0.821269	0.559746	1.48313	NA	0.63824	222.373	2.48699	0	4.03686	0.0111571	13.3913	16.5073	120.39	1.63421	0	4.15573	3.67737	12.4218	28.4541	62.7838
166	69.75	29.25	200	19.1819	11.3119	26.8844	15.6129	0	0	43725.6	0.00518215	0.0241518	0.029334	0.108966	0	0	0	52.8576	NA	1.30383	5.94695	NA	NA	NA	NA	1.24376	NA	31.9329	2.46203	1.18166	1.19575	1.28823	NA	1.12854	574.469	2.54509	4.49551e-07	7.57219	0.015458	24.955	15.1393	164.489	1.73003	0.00026973	7.58142	5.48477	23.9411	26.5052	151.651
167	69.75	29.75	190	15.6173	8.22036	22.6689	18.3548	0	0	63422.2	0.0230218	0.156978	0.18	0.147264	0	0	0	21.4314	0.0160693	1.62938	3.18161	NA	NA	NA	NA	2.13465	NA	63.583	1.92646	1.54658	1.50443	1.89835	NA	1.69608	974.63	2.71984	2.35607e-06	10.0613	0.020124	33.2206	13.1842	245.444	1.67046	0.000668124	9.34153	6.5809	30.0056	22.4452	334.363
168	69.75	30.25	176	15.3285	7.85532	22.3454	19.0968	0	0	64901.6	0.0617157	0.224078	0.285794	0.0993864	0	0	0	4.77711	NA	1.2865	2.18549	NA	NA	NA	NA	2.6627	NA	80.2789	1.67634	2.50016	1.03195	1.55562	NA	2.5862	1260.84	2.74744	1.67254e-05	10.3431	0.0346689	34.0401	14.1135	200.53	1.75898	0.00176363	8.7577	6.68812	28.0956	23.9385	806.707
169	69.75	30.75	166	14.5654	6.9968	21.6693	18.8387	0.411111	5.57222	60267	0.0175194	0.207157	0.224676	0.144138	0	0	0	2.02824	NA	0.897546	0.710439	NA	NA	NA	NA	0.846852	NA	91.0948	0.627986	1.46781	0.638738	0.61243	NA	1.61871	1446.79	2.67104	6.59682e-06	11.2143	0.0415267	36.7196	13.8477	265.948	1.74395	0.00105063	9.21944	7.24672	29.482	24.453	899.869
170	69.75	31.25	167	14.1535	6.54354	21.3533	17.9677	0	0	69918.2	0.0124142	0.218394	0.230808	0.141278	0	0	0	5.99687	NA	0.829763	0.838688	NA	NA	NA	NA	4.00433	NA	79.9405	0.94125	2.17953	1.65473	0.931994	NA	3.211	1556.82	2.75196	0.000118432	12.4662	0.0371338	40.7313	13.7836	315.156	1.76036	0.00452358	10.3216	7.81866	33.0458	23.0858	960.537
171	69.75	31.75	163	13.0007	5.54511	20.0287	16.7419	1.27778	4.63333	52719.8	0.00243379	0.139949	0.142383	0.163941	0	0	0	40.9501	0.0337459	1.65168	1.74778	NA	NA	NA	NA	3.56868	NA	42.4665	1.61934	2.44984	1.64593	1.65815	NA	2.75454	1240.69	2.65786	0.000331826	13.7891	0.034231	44.8548	14.7765	358.915	1.83503	0.00805284	11.227	8.49915	36.0412	24.6786	637.382
172	69.75	32.25	160	13.6272	6.16668	20.6306	19.4194	6.08889	15.8111	227677	0.0256925	0.194212	0.219904	0.149147	0.00338325	0	0	19.4836	1.0606	1.31234	2.05208	0.0321073	0.00803814	0.0292573	0.00802664	2.98716	0.353252	60.2775	1.90016	2.69758	2.18041	1.43428	NA	4.84607	1445.54	2.46805	7.53636e-05	14.7388	0.0289072	47.8455	11.9687	460.734	1.6505	0.00229009	10.6487	8.74741	34.2038	21.9131	528.16
173	69.75	32.75	145	10.1141	3.32122	16.495	36.3226	0.544444	1.3	234428	0.00605093	0.397792	0.403843	0.0560245	0	0	0	2.61251	5.11116	0.362258	0.738287	0.0949912	0.0331537	0.0886721	0.0331365	5.57473	0.561957	64.0637	0.96637	5.65392	0.534911	0.382733	NA	7.47007	1790.69	2.47791	5.41599e-07	16.6595	0.0182636	53.8542	12.8813	447.485	1.79089	0.000145325	10.1561	9.36506	32.8144	23.1884	858.519
174	70.25	24.75	206	23.1346	14.4304	32.2646	10.9355	0	0	160887	0.00135666	0.191229	0.192586	0.0530036	0	0	0	4.43034	NA	2.74253	2.749	NA	NA	NA	NA	4.30997	NA	64.1219	2.71732	4.66212	0.982195	2.23987	NA	4.63323	70.2352	2.99467	0	3.54175	0.0356219	11.8911	16.417	21.0046	1.71169	0	2.38646	2.93931	6.83103	26.9285	17.9779
175	70.25	25.25	199	22.7526	13.7415	32.2532	9.77419	0	0	170592	0	0.00497077	0.00497077	0.0901734	0	0	0	2.01834	NA	1.95466	1.64727	NA	NA	NA	NA	1.91023	NA	80.6638	1.18572	2.61542	0.724607	1.54168	NA	2.66247	82.7953	3.09022	0	3.58576	0.0309828	12.091	16.7284	21.7736	1.7091	0	2.15814	2.92074	6.13131	27.5352	26.6778
176	70.25	25.75	183	22.4608	13.3495	32.0681	9.45161	0.827778	13.3167	86404.7	0	0.0066089	0.0066089	0.074423	0	0	0	11.5876	NA	1.81669	1.01985	NA	NA	NA	NA	0.893247	NA	34.4203	1.05053	1.88231	1.68023	0.931264	NA	2.21932	75.6556	3.08388	0	3.57807	0.0260603	12.1608	16.8304	18.049	1.69552	0	2.01863	2.88127	5.73629	27.9273	27.3937
177	70.25	28.25	198	21.2337	12.7557	30.0793	6.64516	41.2333	492.656	1.01362e+06	0.441902	0.00721971	0.449121	0.0316057	0.0183796	0	0	20.5182	0.0160963	1.41954	58.0367	0.00806685	NA	NA	NA	1.53971	NA	1.82613	1.72753	1.45422	1.01227	3.11269	NA	1.29169	82.1292	2.67812	0	1.5324	0.00510593	5.57055	20.4972	5.38209	1.78161	0	1.08939	1.46386	2.65259	31.9592	62.7793
178	70.25	28.75	200	20.8771	12.4558	29.5543	8.09677	585.278	5938.33	596594	0.542546	0.0253747	0.56792	0.0392271	0	0	0	25.5275	0.0842506	1.57775	57.1052	NA	NA	NA	NA	2.84546	NA	3.04585	2.83811	1.99573	1.07996	3.068	NA	1.3754	89.9339	2.60002	0	1.47149	0.00420169	5.19668	21.1713	10.5158	1.7658	0	1.07783	1.55885	2.26868	33.0352	62.7195
179	70.25	29.25	206	20.7597	12.5207	29.2301	11.3871	0	0	334001	0.359078	0.0979664	0.457044	0.0252144	0	0	0	36.5879	0.111598	1.17668	36.4573	NA	NA	NA	NA	2.96173	NA	11.8667	3.39368	2.82062	1.05007	1.9432	NA	2.25057	160.067	2.41067	1.78888e-06	3.2639	0.00303565	10.8334	19.3469	96.3796	1.72132	0.00107333	4.50511	3.25992	13.7291	32.341	75.1654
180	70.25	29.75	209	20.2827	12.1832	28.3752	15.1935	0.477778	6.89444	199928	0.193103	0.150157	0.34326	0.0708606	0	0	0	19.1654	0.129435	1.14902	17.6586	NA	NA	NA	NA	2.61882	NA	49.7075	2.61813	2.42952	1.09111	1.71893	NA	2.37276	448.564	2.33774	9.37541e-06	7.62817	0.00917888	25.1378	15.2526	344.614	1.63167	0.00265863	8.87	5.5356	28.1585	27.8394	89.4775
181	70.25	30.25	208	18.2537	10.4828	25.7792	15.9355	0	0	86390.9	0.0130268	0.237118	0.250144	0.117161	0	0	0	3.54288	0.102145	0.497784	7.70555	0.0210248	NA	NA	NA	1.34397	0.0204326	81.5646	1.1788	1.51918	0.467011	0.839715	NA	1.85994	792.986	2.45157	6.65547e-05	10.8008	0.0197996	35.4493	14.3933	360.85	1.7361	0.00701793	9.948	6.85209	31.8017	25.7828	179.625
182	70.25	30.75	207	17.6585	9.81426	25.1247	15.7742	0.833333	7.05556	86915.3	0.00681665	0.235344	0.242161	0.134408	0	0	0	0.290813	0.107997	0.197591	4.31902	0.040874	0.0204421	0.0204396	0.0123713	0.733559	0.0241735	90.7818	0.721331	1.17334	0.152028	0.410675	NA	1.73656	901.912	2.47648	2.62504e-05	13.5044	0.0221673	43.9495	14.3337	384.008	1.76695	0.00418072	10.574	8.07627	33.657	24.965	244.179
183	70.25	31.25	209	17.3839	9.46285	24.8862	16.0645	0.211111	0.683333	80222.7	0.0228746	0.271233	0.294108	0.117658	0	0	0	0.867225	0.148673	0.396163	3.86406	0.0656609	0.0587373	0.0458134	0.0765711	1.08448	0.0200163	88.4845	0.830996	1.34661	0.585651	0.5647	NA	2.33343	863.662	2.38782	0.000471272	15.0609	0.0225295	48.8814	14.5728	491.232	1.77544	0.0180005	11.9921	8.74857	38.257	26.1263	207.002
184	70.25	31.75	206	18.6536	10.547	26.3758	14.6452	0	0	137882	0.0136111	0.326294	0.339905	0.0931873	0	0	0	9.72315	0.110805	0.72029	4.76973	0.0548155	0.0672071	0.00925355	0.0773173	1.29808	0.0177522	77.947	1.25369	1.3817	0.659537	0.939265	0.0435661	1.70521	627.957	2.28018	0.00132042	11.4789	0.0104991	37.2813	16.3466	464.481	1.77665	0.0320443	12.6208	7.61496	40.1226	29.6256	194.568
185	70.25	32.25	197	18.0948	10.0713	25.6771	15.129	6.12222	17.6611	223807	0.0652783	0.244391	0.309669	0.109805	0	0	0	5.45283	0.0607367	0.577737	3.56453	NA	NA	0.00810547	NA	1.09233	NA	84.8166	0.934744	1.01265	0.683678	0.763518	NA	1.59198	678.367	2.37426	0.000299891	10.7486	0.0132744	34.9849	14.0566	362.024	1.67122	0.00911285	10.429	7.48629	33.037	26.2433	213.544
186	70.25	32.75	177	15.8927	8.3189	23.1019	30	1.45556	3.42222	223160	0.0444765	0.272776	0.317253	0.112983	0.000645282	0	0	0.820631	0.0793568	0.294171	2.03813	NA	NA	NA	NA	0.755674	NA	91.6737	0.994486	1.13283	0.197889	0.451607	NA	2.10533	930.242	2.33332	2.15516e-06	11.3053	0.0220041	36.8293	13.9923	338.096	1.74218	0.000578287	8.55043	7.17757	27.106	26.6371	394.512
187	70.25	33.25	172	14.5865	7.36746	21.4593	42.1935	3.67222	18.7778	143533	0.0812839	0.361359	0.442643	0.136416	0.000129007	0	0	0.0409913	0.155102	0.0693725	0.763805	NA	NA	NA	NA	0.869922	NA	57.0231	0.631637	1.48315	0.0314014	0.180095	NA	2.50407	1059.29	2.47647	8.99101e-07	13.3292	0.0276928	43.2256	12.6163	246.225	1.70511	0.000381456	8.55927	7.68073	27.3836	23.2371	532.278
188	70.25	33.75	155	11.1135	4.76018	17.3246	61.129	1.63889	6.21667	313194	0.147053	0.399904	0.546957	0.0763898	0.00281026	0	0	0.00897725	1.56321	0.0761699	2.2417	0.132109	0.0730625	NA	NA	7.20089	0.383948	33.4773	3.59686	7.06487	0.0117717	0.444633	NA	7.92171	1781.9	2.60133	2.1664e-07	19.5367	-0.00615184	63.4296	11.2663	536.472	1.55043	9.19123e-05	14.3345	10.4224	46.5644	18.7318	966.273
189	70.75	24.25	239	23.9455	15.4614	32.7322	20.5806	28.5833	419.522	40794	0.0163232	0.143352	0.159675	0.00904092	0	0	0	12.8336	NA	3.65911	4.09956	NA	NA	NA	NA	3.45755	NA	15.9413	4.00123	3.41666	1.85694	2.55314	NA	2.81519	28.9861	2.70874	0	2.52212	0.0124363	8.69056	18.5359	27.305	1.76381	0	2.88814	2.40083	8.81663	29.8178	-18.7867
190	70.75	24.75	205	23.3243	14.6188	32.3312	14.2903	0.822222	11.5111	130497	0.00347935	0.321045	0.324524	0.018324	0	0	0	6.44497	NA	8.97625	7.0428	NA	NA	NA	NA	7.36	NA	28.0672	5.17267	6.70791	2.69419	4.80786	NA	6.34519	70.4284	2.83132	0	3.0335	0.0240383	10.3937	16.3341	28.9725	1.69389	0	2.30355	2.54964	6.77793	26.7682	1.65934
191	70.75	25.25	192	22.8192	13.9366	32.0254	8.70968	0	0	164983	0.000905144	0.0928684	0.0937736	0.0660551	0	0	0	2.00524	NA	5.89435	5.05188	NA	NA	NA	NA	3.77072	NA	28.2335	3.09924	4.95855	1.42568	3.27798	NA	5.01102	121.734	2.92511	0	3.31238	-0.0103073	11.1248	16.055	19.0304	1.67695	0	2.13239	2.6883	6.10276	27.3822	77.199
192	70.75	27.75	154	21.2524	12.6267	30.4079	4.06452	0	0	45747.4	0.000284313	0.0534	0.0536844	0.00797707	0	0	0	47.0255	NA	0.383781	0.118655	NA	NA	NA	NA	0.0666854	NA	0.382431	0.112297	0.289568	0.182634	0.0765415	NA	0.0854063	116.255	2.73019	0	3.0093	0.00639045	10.6595	15.9621	16.8717	1.70642	0	2.10654	2.18991	6.43768	26.1887	75.41
193	70.75	28.25	179	20.9402	12.3349	30.1626	6.22581	4.57778	71.3	124925	0.0435942	0.0235362	0.0671304	0.0419209	0	0	0	73.7416	NA	0.553003	13.498	NA	NA	NA	NA	0.506815	NA	0.28468	0.545953	0.367849	0.657716	0.996776	NA	0.163715	96.1951	2.72161	0	2.00939	0.00142431	7.11585	18.8795	8.9617	1.7777	0	1.31202	1.74426	3.45669	29.9731	70.4098
194	70.75	28.75	199	20.4925	11.9315	29.6774	7.77419	37.2111	420.983	919617	0.582987	0.0043284	0.587315	0.0405873	0.00596563	0	0	25.0929	0.0482306	1.22166	67.231	NA	NA	NA	NA	1.23582	NA	0.454759	1.12069	0.809265	0.929225	2.0346	NA	0.37827	91.9645	2.65567	0	1.39966	0.0037726	5.05623	21.0254	4.22629	1.78386	0	1.00343	1.44581	2.14356	32.4848	66.7875
195	70.75	29.25	209	20.674	12.3268	29.4477	9.51613	591.311	5871.19	838806	0.591298	0.0382176	0.629516	0.0427321	0	0	0	2.75323	0.155999	0.922662	80.1544	NA	NA	NA	NA	3.6574	NA	3.26837	3.11583	2.66142	0.492721	1.69494	NA	1.6794	99.1986	2.60264	0	1.07178	0.0053519	4.12955	22.3785	4.14906	1.76894	0	0.935205	1.22509	1.93586	33.996	70.069
196	70.75	29.75	208	20.685	12.368	29.1346	12.0645	202.206	1170.72	1.1671e+06	0.609186	0.0290433	0.63823	0.0429066	0.00407007	0	0	0.682251	0.0911381	0.618599	78.8082	0.00805074	NA	NA	NA	3.50994	0.0152072	6.44618	2.96366	2.78225	0.358736	2.10133	NA	2.16339	115.271	2.52218	0	1.07255	0.00484532	4.14771	21.9288	13.8465	1.74147	0	0.985229	1.24203	2.15866	34.1421	84.534
197	70.75	30.25	216	20.5464	12.211	28.7504	11.7742	207.972	1182.68	950793	0.547528	0.0392128	0.586741	0.0356617	0.0144537	0	0	3.34714	0.103568	0.957339	55.1791	0.0269888	0.0160708	0.0160697	0.00803555	3.47005	0.0210686	22.7545	4.28461	3.55569	0.644831	2.34399	0.0160687	3.81659	172.985	2.41041	0	2.88575	0.0102335	9.79487	20.3883	84.1384	1.72414	0	4.44667	3.09984	13.4216	33.4556	95.7016
198	70.75	30.75	217	20.3524	12.0634	28.4168	10.5484	215.011	1189.78	624561	0.541865	0.0178471	0.559712	0.0389955	0.00542055	0	0	1.25153	0.0983896	0.940746	37.7693	0.0447922	0.0224153	0.0224121	0.014347	3.21951	0.0241461	40.397	4.89071	3.52738	0.460206	2.13522	NA	5.73575	191.601	2.34999	0	2.99172	0.00727906	10.1263	20.9669	85.1303	1.74838	0	5.25583	3.48931	16.0299	34.2896	115.659
199	70.75	31.25	220	20.0261	11.8093	28.0693	12.871	218.572	1192.79	341046	0.526725	0.0271674	0.553892	0.0354886	0	0	0	2.87485	0.217419	0.668457	31.4215	0.0735453	0.0745555	0.0557016	0.104296	3.29745	0.0493871	47.0109	3.71809	3.18396	1.30535	1.11154	0.0563529	5.36615	180.104	2.44909	0	1.80209	0.00437903	6.28639	21.6788	35.9843	1.78814	0	2.08674	2.0384	5.64764	34.474	122.274
200	70.75	31.75	215	19.7334	11.5508	27.7889	13	221.572	1195.13	496322	0.376131	0.150876	0.527007	0.0244148	0.00785008	0	0	24.0233	0.150402	1.12032	29.4982	0.0392786	0.0549797	0.0173	0.046311	3.10331	0.0312324	30.3143	2.72203	2.62962	1.07119	2.58462	0.0353323	3.10512	188.749	2.52594	0	1.27913	0.00275107	4.69637	21.435	16.5268	1.76945	0	1.07578	1.42861	2.31917	33.8285	134.574
201	70.75	32.25	212	18.7823	10.7863	26.6385	15.129	0	0	277989	0.0738342	0.306321	0.380155	0.0558895	0	0	0	16.18	0.139089	0.961302	9.06413	0.038009	0.0551047	0.0131592	0.0436367	1.61619	0.0282273	64.115	1.45109	1.62095	1.6309	1.28504	0.0922208	2.43909	298.944	2.63155	0	3.44691	0.00570639	11.6853	19.6553	107.302	1.78083	0	5.97368	3.91407	18.5207	31.2769	174.12
202	70.75	32.75	211	18.6405	10.6833	26.3494	23.6452	7.36667	32.3944	886266	0.339183	0.108296	0.447479	0.0552825	0.00532772	0	0	2.85548	0.307055	0.586388	8.54153	0.0191627	0.025355	0.0185027	0.0147762	2.02895	0.0473167	73.501	3.30817	2.1157	0.800884	1.43898	0.0846173	5.02204	366.865	2.42108	0	3.5746	0.00624795	12.1409	17.4731	122.73	1.66915	0	6.03974	3.82296	18.9205	30.5154	224.051
203	70.75	33.25	208	16.0986	8.63476	23.2629	38	4.22222	22.8167	396477	0.125921	0.348972	0.474893	0.0671263	0.00120024	0	0	0.108524	1.06347	0.273739	4.36778	0.0179452	0.0233473	0.0179424	0.0125401	3.07311	0.0178514	77.5719	2.91362	3.97348	0.157286	0.774359	NA	6.2699	814.615	2.55449	3.57775e-06	11.3907	0.0252004	36.6716	13.6017	250.475	1.70244	0.00151791	10.411	7.32381	32.6071	23.5376	367.445
204	70.75	33.75	186	10.5157	4.25322	16.5327	37	0	0	315310	0.0110355	0.44491	0.455945	0.0232353	0	0	0	NA	5.27301	0.122214	3.35105	0.476053	0.402697	0.0295262	0.032176	13.2173	1.56428	34.2403	6.67309	7.42178	NA	0.595422	NA	8.34054	1706.41	2.52368	8.62064e-07	23.1511	0.0206004	74.7449	11.7625	411.947	1.72159	0.000365742	13.2336	11.7132	42.8075	20.084	892.065
205	71.25	28.25	163	21.0829	12.4444	30.2961	6.32258	4.19444	66.7	51838.6	0	0.0119338	0.0119338	0.00952503	0	0	0	88.7465	NA	0.534801	0.20704	NA	NA	NA	NA	0.308486	NA	0.940711	0.191557	0.447189	0.324666	0.453963	NA	0.188278	107.301	2.75038	0	1.99722	0.00185244	7.17007	18.4886	8.0804	1.76091	0	1.32216	1.68594	3.74794	29.6676	79.199
206	71.25	28.75	190	20.7024	12.1732	29.8453	8.12903	37.0722	414.35	79771.6	0.0504749	0.0407597	0.0912346	0.00515657	0	0	0	77.1441	NA	1.43609	16.6454	NA	NA	NA	NA	0.887499	NA	0.438356	0.945619	0.47837	0.951824	1.39049	NA	0.229028	102.262	2.68275	0	1.2667	0.00160185	4.76342	20.962	5.00424	1.78377	0	0.980737	1.3022	2.20741	32.2828	74.673
207	71.25	29.25	202	20.7091	12.3372	29.6655	9.3871	385.9	4859.57	872933	0.648529	0.0011817	0.649711	0.0409753	0.00677279	0	0	14.6654	NA	1.25913	78.3242	NA	NA	NA	NA	1.21543	NA	0.579103	1.22374	0.78254	0.525533	1.60569	NA	0.361326	105.592	2.64062	0	1.03017	0.00547356	4.02927	21.9507	4.05736	1.78248	0	0.89738	1.16766	1.85037	33.3174	75.3072
208	71.25	29.75	206	20.5971	12.3348	29.2705	10.5806	208.267	2124.33	1.19095e+06	0.675667	2.19188e-09	0.675667	0.0444045	0.00467366	0	0	0.362533	0.0233044	0.257686	90.3041	NA	NA	NA	NA	1.51613	0.00804873	2.35893	1.67422	1.44672	0.0793082	1.57639	NA	0.943573	112.966	2.62803	0	1.12625	0.00554937	4.2708	21.4847	4.04073	1.7755	0	0.908863	1.23969	1.85512	32.9527	84.3181
209	71.25	30.25	215	20.4141	12.2012	28.9184	11.0323	212.189	2117.58	1.73273e+06	0.487738	0.0339279	0.521666	0.052153	0.0426871	0	0	0.0918667	0.0250174	0.354709	57.2687	NA	NA	NA	NA	3.0658	NA	24.5554	4.16331	3.46228	0.0619168	3.77366	NA	3.71955	125.361	2.61324	0	1.4583	0.00574468	5.18087	20.4635	5.18214	1.77405	0	1.02667	1.517	2.12679	31.8743	100.1
210	71.25	30.75	221	20.5127	12.4015	28.9251	10.1613	0.105556	1.59444	418109	0.456942	0.0695246	0.526466	0.0534487	0	0	0	1.40126	0.0784182	0.589145	49.4662	NA	NA	0.0123653	NA	3.74713	NA	25.4537	7.04368	3.89789	0.405361	1.42737	NA	7.02907	140.743	2.61608	0	1.35636	0.00579975	4.88315	20.5023	5.16732	1.77396	0	0.980481	1.42549	2.0092	31.9354	121.443
211	71.25	31.25	221	20.1023	12.1165	28.4584	12.0645	0	0	419987	0.355279	0.0879874	0.443266	0.0450593	0	0	0	0.838175	0.0315208	0.306421	40.9644	NA	NA	NA	NA	2.98361	NA	43.0994	4.11091	2.72298	0.542516	0.441355	NA	4.51048	157.133	2.64293	0	1.09029	0.00791282	4.18206	21.1097	5.34779	1.7796	0	0.860345	1.18264	1.71211	32.6038	137.882
212	71.25	31.75	224	19.9267	12.0012	28.2496	14.2903	215.722	1179.57	493947	0.434604	0.0191349	0.453739	0.051802	0.00366155	0	0	0.264813	0.0521966	0.315242	32.3699	0.0241105	0.0482278	0.00804252	0.0160966	2.93743	0.0401948	55.8446	2.5735	2.42675	0.164669	0.661036	0.0241083	2.81968	174.051	2.67983	0	1.08451	0.0100439	4.18634	21.859	6.62074	1.77772	0	0.875182	1.18337	1.80923	33.4849	145.647
213	71.25	32.25	220	19.3914	11.5698	27.5878	17.2903	219.35	1187.61	395999	0.382041	0.0821936	0.464235	0.0634373	0.001506	0	0	0.174961	0.141546	0.377852	31.125	0.0786588	0.0993747	0.049987	0.130203	2.88894	0.056989	55.6651	2.48587	2.68338	0.188304	0.730355	0.538259	3.16591	287.597	2.7055	0	4.09385	0.0111676	13.7692	21.135	125.342	1.83715	0	6.0754	4.02643	19.0753	32.4846	153.101
214	71.25	32.75	227	19.0537	11.2445	26.9593	23.8065	220.556	1183.58	338212	0.227346	0.204745	0.432091	0.0499805	0	0	0	0.122163	0.124059	0.327191	17.1701	0.0430909	0.0372523	0.0420973	0.06868	2.14385	0.0389616	71.0014	2.66567	2.13426	0.20051	0.573905	0.646604	3.71709	384.356	2.75399	0	6.20618	0.00783562	20.3953	17.2611	201.76	1.69115	0	9.68459	5.98687	30.5972	27.6025	179.259
215	71.25	33.25	224	16.7303	9.25811	24.0242	42.6452	0	0	281447	0.0508303	0.405041	0.455872	0.0578488	0	0	0	0.110831	1.21947	0.345216	7.98868	0.032408	0.0204661	0.0383544	0.0494356	3.62215	0.0341013	71.7246	3.27855	4.73704	0.205481	1.00072	NA	6.53303	641.464	2.61461	0	10.1641	0.0326331	32.4842	15.1753	205.313	1.80929	0	10.1711	6.97233	31.3608	26.2106	334.145
216	71.25	33.75	217	15.2201	8.04001	22.2311	47.4516	0.266667	2.61667	876804	0.0952512	0.429436	0.524687	0.0266644	0.0205853	0	0	NA	3.3712	0.409005	5.58964	0.0321889	0.016095	0.00806079	NA	8.43619	0.209494	56.4752	3.59351	8.26989	NA	2.48385	NA	9.65349	1025.77	2.38914	0	18.2399	0.0328621	58.8686	14.2123	353.751	1.82897	0	13.7076	10.0066	43.7712	25.7042	348.674
217	71.25	34.25	191	16.1584	8.73504	23.4164	57.0645	45.0222	155.383	631339	0.0668904	0.31565	0.382541	0.172614	0.00739591	0	0	0.128589	0.99786	0.294772	6.96754	0.0446802	NA	0.00804326	0.00802494	9.07588	0.0714232	38.5031	1.56577	9.22866	0.0482232	1.20067	NA	11.0072	881.629	2.4672	0	17.9872	0.0319679	58.5017	13.5169	320.683	1.76742	0	14.1548	10.0041	45.7242	24.3625	330.331
218	71.25	34.75	172	12.5446	5.71885	19.2425	92	12.9889	81.2278	503217	0.134845	0.335843	0.470688	0.0681876	0.00955448	0	0	NA	0.335738	0.097709	2.95277	0.0594341	NA	NA	0.00806807	7.08476	0.085662	18.6837	2.7309	5.24001	NA	0.345971	NA	6.03436	1170.47	2.2696	0	18.9143	-0.0124021	62.0844	10.6091	362.884	1.56935	0	14.3654	9.5002	46.739	21.0775	589.627
219	71.75	28.25	157	21.5202	12.849	30.6355	6.48387	3.62778	28.8222	46479.1	0	0.0655325	0.0655325	1.65458e-23	0	0	0	82.0125	NA	0.233037	0.0751783	NA	NA	NA	NA	0.111156	NA	0.432291	0.0961198	0.76042	0.138365	0.113444	NA	0.0894925	113.66	2.76639	0	2.0007	0.00141532	7.05919	18.2941	6.51973	1.75273	0	1.25148	1.7553	3.3554	29.2926	92.6655
220	71.75	28.75	171	21.1354	12.6319	30.2323	9.19355	36.8556	405.889	45084.3	0.0173383	0.0101724	0.0275107	0.000544117	0	0	0	87.2344	NA	0.943631	6.2994	NA	NA	NA	NA	0.674248	NA	0.805177	0.503676	0.526084	0.543239	0.868608	NA	0.19499	114.05	2.68782	0	1.57064	0.000688455	5.61934	20.2293	5.02804	1.78168	0	1.10608	1.56654	2.50776	31.6139	88.7842
221	71.75	29.25	200	20.8832	12.5797	29.832	10.3871	175.728	2787.86	814011	0.495265	0.00813183	0.503397	0.0273192	0.0144363	0	0	30.5616	0.0193485	3.05728	56.5491	NA	NA	NA	NA	1.38286	NA	1.60339	1.50879	0.763003	1.24476	3.19769	NA	0.482539	117.644	2.6605	0	1.18016	0.00375196	4.45204	21.538	4.70668	1.79601	0	0.951054	1.28504	1.98752	32.8297	95.1024
222	71.75	29.75	199	20.6593	12.524	29.4576	10.5484	0.0611111	0.8	1.27286e+06	0.702503	2.02715e-06	0.702505	0.0488197	0.00573611	0	0	3.4615	0.0160941	0.689472	93.1747	NA	NA	NA	NA	0.379721	NA	0.330363	0.475537	0.190918	0.266412	1.46382	NA	0.1069	121.11	2.6492	0	1.07919	0.00408992	4.12318	21.5283	4.21073	1.78438	0	0.849369	1.18101	1.6479	32.7938	100.352
223	71.75	30.25	213	20.6373	12.574	29.2909	10.7419	0	0	1.57873e+06	0.667092	0.0108204	0.677912	0.0469279	0.0187774	0	0	0.196487	0.0297262	0.337225	87.8352	NA	NA	0.00803177	NA	0.913998	NA	3.85976	1.74515	1.13923	0.121738	3.2957	NA	1.06933	129.094	2.64516	0	1.25231	0.00374902	4.61318	21.1321	4.42643	1.78279	0	0.985954	1.36331	2.06572	32.4361	103.144
224	71.75	30.75	217	20.5369	12.5657	29.0639	9.80645	215.35	2098.99	524696	0.413668	0.0222161	0.435884	0.0507785	0	0	0	8.44576	0.0905314	2.38783	44.8432	0.0080619	0.00886663	0.0148002	NA	1.97694	0.0161169	28.2956	3.04955	3.48007	1.96488	2.05374	NA	3.91677	140.786	2.62899	0	1.34858	0.00854129	4.9272	20.6115	5.76683	1.77376	0	1.0686	1.44885	2.34374	31.9378	114.886
225	71.75	31.25	222	20.2951	12.4796	28.7875	11.0645	1	13.7833	124000	0.0227613	0.0335943	0.0563557	0.00513811	0	0	0	6.15075	0.118158	1.60961	12.8874	0.0121619	0.00890685	0.0181855	0.063709	5.35016	0.017814	59.1569	2.27652	2.67112	3.40447	1.53647	NA	5.42549	158.01	2.62353	0	1.34812	0.0119151	4.93418	20.4439	6.62371	1.78103	0	1.01206	1.417	2.17902	31.8829	130.809
226	71.75	31.75	227	20.1096	12.4119	28.6034	18.6129	0.277778	5.76667	139783	0.0395971	0.121083	0.16068	0.0273373	0	0	0	1.45821	0.146435	0.440558	5.85563	NA	NA	NA	NA	1.79409	NA	85.5896	0.995785	1.04291	0.903493	0.636498	NA	1.81286	177.355	2.64619	0	1.18911	0.00920538	4.44232	20.9921	6.46317	1.78526	0	0.858827	1.24656	1.70188	32.6904	154.134
227	71.75	32.25	230	19.9068	12.2082	28.2792	21.9032	0	0	475556	0.378967	0.149129	0.528097	0.0525412	0	0	0	0.124474	0.0771042	0.275744	32.495	0.0401874	0.032144	0.0152605	0.0964462	2.57495	0.0321455	53.9479	3.2228	2.59849	0.285572	1.3212	0.225046	3.54507	236.521	2.66198	0	2.36745	0.00789783	8.22791	20.6766	105.69	1.75025	0	4.14465	2.54717	12.9696	32.184	165.923
228	71.75	32.75	236	19.105	11.3969	27.1845	25.7742	212.389	1146.35	461899	0.27424	0.206421	0.48066	0.0535913	0.0061817	0	0	0.0709909	0.126071	0.29102	21.176	0.0339672	0.051093	0.0683553	0.0651055	2.59759	0.0448208	63.6112	3.83328	2.79062	0.0224939	0.87235	0.168694	4.76915	343.646	2.68452	0	5.34313	0.00527226	17.6911	18.7534	149.56	1.80371	0	7.40181	4.79637	23.4087	29.6997	187.133
229	71.75	33.25	229	18.097	10.4115	25.8534	43.9032	209.744	1132.19	191212	0.0552089	0.342505	0.397714	0.0746454	0	0	0	NA	0.203319	0.312873	6.50902	NA	NA	NA	NA	2.16374	NA	80.5338	2.1657	3.31678	NA	0.619797	NA	4.62684	430.287	2.64225	0	7.32398	0.0183802	23.6629	16.4306	140.922	1.816	0	7.09429	5.56622	21.933	27.6095	209.06
230	71.75	33.75	218	17.492	9.94968	25.1675	53.0323	187.156	980.411	943274	0.180168	0.337401	0.517569	0.0378952	0.011898	0	0	NA	1.41953	1.09918	18.7052	NA	NA	NA	NA	6.61142	NA	48.3656	4.26783	6.75404	NA	6.70501	NA	6.61574	513.488	2.54981	0	8.87722	0.0183272	28.7782	19.0636	219.698	1.95051	0	11.0197	6.62797	34.8565	31.0739	255.399
231	71.75	34.25	206	17.6498	10.0477	25.4687	65.5161	63.3556	276.783	2.47563e+06	0.523966	0.0635265	0.587493	0.0447903	0.0577698	0	0	NA	1.81751	0.972421	48.4508	NA	NA	NA	NA	6.702	NA	20.6207	4.1493	6.29454	NA	5.80563	NA	5.728	546.965	2.56167	2.6973e-06	10.6091	0.0124515	34.749	15.5271	280.443	1.70836	0.000660697	13.7064	7.49243	44.1764	26.6257	276.064
232	71.75	34.75	196	12.8544	5.81095	20.1013	122.645	12.8389	107.111	939603	0.336647	0.203584	0.540231	0.0232014	0.0067757	0	0	NA	1.99351	0.689541	21.9316	0.183399	0.0933311	NA	0.0112671	14.4186	0.606126	20.3577	11.8665	10.4359	NA	3.22636	NA	10.6715	1152.26	2.6137	1.09947e-06	19.9421	0.00906216	65.2104	12.2792	443.919	1.69459	0.000428926	13.8807	10.0017	45.2594	20.5441	494.945
233	71.75	35.25	166	6.92338	1.23765	12.667	159.323	1.17778	19.7222	298636	0.053363	0.211575	0.264938	0.0511615	0	0	0	0.153713	3.1911	0.330659	6.32511	1.43596	1.17569	0.893139	1.84328	18.2024	1.59744	11.5321	7.19261	9.43924	0.1268	0.986069	0.0474829	9.44014	2318.39	2.62818	7.5574e-05	35.7886	-0.0117152	116.696	11.3118	696.287	1.75551	0.00641871	13.1695	14.9062	43.9859	17.4805	965.07
234	71.75	35.75	138	3.59757	-1.57608	8.95211	98.9032	2.97222	24.0111	110052	0.0321532	0.111748	0.143901	0.106502	0	0	0	14.4073	1.99611	3.26644	4.44519	0.93363	0.88645	0.558147	1.0147	21.3638	1.05729	6.08137	6.91775	8.41948	5.47323	2.85095	0.0645035	8.31763	3161.36	2.62356	0.00234601	41.7091	0.00526555	136.657	10.9909	848.138	1.79696	0.0421933	15.938	16.2071	52.4904	17.3457	1286.29
235	71.75	36.25	114	-1.13672	-6.07102	3.66349	60.9355	0	0	29627.3	0.00114612	0.0226207	0.0237668	0.12676	0	0	0	32.855	0.462647	2.70349	2.51136	0.239452	0.277793	0.238133	0.221821	6.25565	0.265031	1.23781	3.91223	1.87553	14.564	2.25407	0.0935919	1.86777	4158.98	2.64358	0.0104803	43.2149	0.0248431	141.612	10.9922	912.143	1.77875	0.0983889	21.3005	16.5209	68.7741	17.1367	1988.11
236	72.25	28.75	159	21.4474	12.9712	30.4283	10.0968	31.9	363.383	38771.5	0.0103211	0.0162329	0.026554	8.77933e-05	0	0	0	75.2728	NA	0.119344	0.142449	NA	NA	NA	NA	0.141706	NA	0.211591	0.109888	0.064334	0.123396	0.148974	NA	0.0448932	124.83	2.66943	0	1.9608	-0.00202563	6.63305	19.722	5.6859	1.79118	0	1.1481	1.87591	2.43423	31.1341	98.2092
237	72.25	29.25	193	21.0943	12.8703	29.977	9.80645	0.0555556	3.57778	121114	0.0562508	0.0453598	0.101611	0.00332736	0	0	0	74.5052	0.0467463	1.18836	13.6496	NA	NA	NA	NA	1.53284	NA	2.08551	1.55911	0.931916	0.678854	1.00189	NA	0.633007	130.743	2.65748	0	1.66686	6.9843e-05	5.76106	20.535	5.25141	1.79804	0	1.15295	1.7172	2.42158	31.9381	106.746
238	72.25	29.75	200	20.8405	12.7843	29.5819	9.80645	180.211	2773.9	912495	0.605662	0.00880155	0.614464	0.0417317	0.00272903	0	0	14.5031	0.0146322	0.512832	81.3488	NA	NA	NA	NA	0.747014	NA	0.503282	0.767422	0.430028	0.249067	1.28055	NA	0.186876	132.773	2.65048	0	1.02672	0.00457885	4.02179	21.9702	4.41657	1.7853	0	0.900384	1.17192	1.82484	33.252	108.648
239	72.25	30.25	210	20.8435	12.894	29.4653	10.0323	0.0333333	0.305556	1.25055e+06	0.695276	2.23823e-06	0.695278	0.0480798	0.0088954	0	0	0.329125	0.00809187	0.0941897	97.3289	NA	NA	NA	NA	0.268955	NA	0.0361462	0.756207	0.14346	0.0714356	1.38189	NA	0.131722	140.247	2.65111	0	0.854052	0.00546615	3.57722	22.3765	5.14622	1.77751	0	0.868659	1.04352	1.79516	33.5577	115.867
240	72.25	30.75	214	20.7557	12.9015	29.2648	9.67742	61.6278	713.628	1.14312e+06	0.66999	2.23537e-09	0.66999	0.0455597	0.00326126	0	0	0.0159542	0.0734435	0.0639193	86.3292	NA	0.0160946	0.0160782	0.00804766	1.31237	NA	3.95456	3.04655	1.37228	0.0418337	2.06068	NA	2.25634	146.081	2.66781	0	0.98988	0.00436654	3.91935	21.8803	5.14736	1.78616	0	0.891192	1.14331	1.81781	33.1127	121.155
241	72.25	31.25	219	20.5138	12.8329	29.0037	12.3871	153.417	1368.11	969730	0.59483	0.00520802	0.600038	0.0308436	0.0132434	0	0	1.02114	0.216145	0.563195	68.7162	0.0444337	0.0153391	0.0331833	0.0861026	2.51921	0.0321826	15.6426	3.29064	1.9844	0.453589	2.54726	0.0516955	3.35396	157.435	2.66911	0	1.29083	0.00655766	4.72062	21.0917	6.70702	1.79216	0	0.982018	1.38592	2.03876	32.5399	128.3
242	72.25	31.75	227	20.4284	12.8339	28.9623	23.2581	69.5111	486.244	514360	0.438061	0.0731816	0.511243	0.0322711	0	0	0	0.283193	0.0892695	0.440731	48.2735	0.0446708	0.0154086	0.0373514	0.103878	1.62201	NA	43.6671	1.56348	1.45696	0.136842	1.29844	0.0519713	1.66036	173.218	2.66009	0	1.3433	0.00686508	4.86427	20.9413	8.36534	1.78943	0	1.11954	1.44565	2.56923	32.577	143.502
243	72.25	32.25	232	19.9866	12.4157	28.4649	26.5484	70.5722	483.428	593483	0.470678	0.093627	0.564305	0.0516774	0.00387267	0	0	0.0665818	0.116544	0.923909	58.6091	NA	NA	0.00802924	NA	2.71967	NA	26.4829	3.59185	2.45326	0.0147725	2.43283	NA	3.18118	307.488	2.63633	0	3.78596	0.00963337	12.766	18.9173	195.843	1.73271	0	5.75892	3.46929	18.0322	30.5632	158.239
244	72.25	32.75	233	18.4142	10.8342	26.4125	29.6774	0	0	329475	0.032686	0.465349	0.498035	0.036543	0	0	0	NA	0.0932978	0.518036	20.9645	NA	NA	NA	NA	3.22972	NA	61.1741	4.51924	3.0046	NA	1.3106	NA	5.72679	464.297	2.79894	0	4.28463	0.00108493	14.41	19.4315	160.577	1.92645	0	4.89816	3.59359	15.0154	29.43	212.552
245	72.25	33.25	228	18.9441	11.0878	27.0726	52.129	14.3833	150.633	332569	0.119284	0.347539	0.466822	0.034879	0	0	0	NA	0.0377293	0.332808	9.62619	NA	NA	NA	NA	3.62407	NA	70.5925	4.54349	4.301	NA	0.811115	NA	6.67278	403.83	2.7712	0	3.69063	0.00216202	12.4482	17.1122	72.3726	1.80672	0	3.21698	3.09345	9.46428	27.0516	229.86
246	72.25	33.75	221	18.0105	10.3175	26.1031	57.0968	186.161	969.5	717487	0.217044	0.323284	0.540328	0.0362822	0.00729052	0	0	NA	0.657303	1.14302	23.1524	0.0633976	NA	NA	NA	9.26365	0.0374082	36.9685	6.59694	9.30709	NA	5.27895	NA	8.12306	409.397	2.67623	0	6.86379	0.0114887	22.076	17.1566	123.929	1.82612	0	7.63535	5.63928	23.6357	28.0321	238.772
247	72.25	34.25	229	17.1599	9.74108	25.3309	75.7742	183.156	937.078	1.87724e+06	0.498162	0.111973	0.610135	0.0341729	0.0359755	0	0	NA	0.673585	1.83831	58.6571	0.275126	0.329166	0.184179	0.2041	6.20598	0.168546	8.0723	6.17173	5.04374	NA	9.94693	1.3856	3.45042	564.832	2.74497	1.52288e-05	12.1959	0.0150436	39.7589	15.8955	297.001	1.72279	0.00348203	14.3454	8.03879	46.3765	26.1153	274.484
248	72.25	34.75	210	12.2285	5.56139	19.487	122.258	4.6	45.8111	1.20355e+06	0.33408	0.128364	0.462443	0.0133075	0.0185934	0	0	NA	2.73689	2.62605	36.3269	0.54455	0.380571	0.0991597	0.122264	11.4215	1.74848	9.56756	12.7307	6.73992	NA	8.83996	1.12151	6.75846	1319.67	2.7042	1.75961e-05	23.1685	0.00868114	75.7039	12.4533	485.312	1.72066	0.00331384	14.1806	11.0532	46.5044	19.7711	524.397
249	72.25	35.25	171	5.09529	-0.127675	10.7011	145.097	0.266667	10.8667	370929	0.0659276	0.101003	0.16693	0.043713	0	0	0	1.84438	4.44891	2.04897	10.0758	2.79475	2.27525	1.65283	4.28525	25.3524	3.20373	8.64224	9.59518	11.0305	1.21131	3.09073	0.0466467	9.52823	2719.94	2.66669	0.000970466	36.0488	0.0263066	117.986	11.2639	754.469	1.75741	0.0237441	14.2201	14.8991	47.122	17.0374	995.336
250	72.25	35.75	136	0.775865	-4.15302	5.91585	103.516	0	0	56155.2	0.00100961	0.0233453	0.0243549	0.102875	0	0	0	22.5477	1.37554	5.39189	5.95009	0.908776	0.926677	0.535748	1.1643	23.607	0.985267	2.38429	9.64369	4.61873	12.2551	4.49501	0.14053	3.61322	3848.95	2.74373	0.00582792	42.3165	0.037375	139.101	11.3881	793.825	1.79738	0.0721758	19.6433	17.587	63.7636	17.1544	1607.24
251	72.25	36.25	113	1.01548	-4.24448	6.09693	61.7097	0.416667	10.3667	85668.8	0.0124971	0.0340401	0.0465372	0.150528	0	0	0	46.1861	0.397564	4.55936	4.41953	0.326148	0.467022	0.493694	0.33412	11.1699	0.230752	0.912319	7.32854	1.99337	14.7276	3.99169	0.44959	1.92232	3988.47	2.6387	0.0125685	42.2146	0.0535553	138.397	10.8949	975.734	1.79083	0.108537	22.5254	16.6927	72.7005	17.535	1820.8
252	72.25	36.75	99	-4.58412	-9.71164	0.0319042	27.8065	0.0444444	4.37222	13674.2	0.00079301	0.00373107	0.00452409	0.27397	0.000214201	0	0	19.6644	0.106378	1.07739	0.968328	0.0877703	0.123721	0.147918	0.200484	1.91024	0.0604759	0.207534	1.58887	0.390191	8.5662	0.970309	0.243296	0.386518	4556.13	2.4523	0.00707039	41.4187	-0.000125761	135.317	9.84405	784.663	1.65318	0.0805826	22.745	15.3278	73.2652	17.4026	2585.9
253	72.75	29.25	187	21.3438	13.2231	30.0907	8.3871	0.0277778	0.361111	374804	0.187095	0.0955403	0.282636	0.0127698	0	0	0	42.2452	NA	3.10788	24.8249	NA	NA	NA	NA	2.71626	NA	1.72167	2.7712	1.49433	1.35944	2.60994	NA	0.876656	142.982	2.64399	0	1.7233	0.00075966	5.8844	20.7095	4.69853	1.79287	0	1.24299	1.81366	2.62157	32.1029	115.559
254	72.75	29.75	199	21.0793	13.1773	29.6631	9.64516	182.961	2776.23	839983	0.618959	0.0087119	0.627671	0.0384704	0.00618048	0	0	11.9144	0.00804096	1.98639	76.1412	NA	NA	NA	NA	1.61523	NA	0.579789	1.70301	0.896176	0.769157	2.25147	NA	0.351154	144.803	2.6561	0	1.06857	0.00498898	4.15783	22.2819	4.50368	1.79311	0	1.02174	1.26892	2.20439	33.5056	111.177
255	72.75	30.25	210	21.1181	13.3113	29.6142	10.4839	0	0	1.1824e+06	0.698588	2.0144e-06	0.69859	0.0470742	0.00413267	0	0	0.843623	0.00808137	0.311048	95.95	NA	NA	NA	NA	0.302077	NA	0.0838551	0.394936	0.185574	0.115546	2.01393	NA	0.074232	150.85	2.63995	0	0.805061	0.00471833	3.44262	22.4438	5.78043	1.77108	0	0.780649	0.961316	1.51331	33.7571	129.178
256	72.75	30.75	212	20.8949	13.1866	29.2947	9.74194	61.55	695.35	1.27691e+06	0.695389	3.48096e-09	0.695389	0.0495484	0.00800313	0	0	0.0144193	0.0110032	0.0443809	95.5012	NA	NA	NA	NA	0.458671	NA	0.414693	0.789163	0.337478	0.0144199	2.47404	NA	0.488312	160.402	2.66256	0	0.92533	0.00293334	3.73715	21.8979	5.85598	1.78415	0	0.79582	1.04649	1.53012	33.1679	134.462
257	72.75	31.25	217	20.6261	13.0642	29.0309	12.2258	0.611111	13.0111	1.39848e+06	0.690659	2.8927e-06	0.690662	0.0413523	0.0096737	0	0	NA	0.0629495	0.15955	93.5648	0.00803249	0.00803213	0.00802928	0.0160625	0.512545	NA	0.742222	0.883197	0.477153	0.00975756	3.52286	0.00803178	0.571106	168.873	2.69984	0	1.1019	0.00270079	4.1837	21.4244	6.1163	1.79952	0	0.847022	1.19547	1.6379	32.6869	143.794
258	72.75	31.75	223	20.5006	13.0571	29.0246	20.9355	79.15	904.706	1.07735e+06	0.667979	2.7458e-09	0.667979	0.0464074	0.00749395	0	0	0.00805987	0.160167	0.633233	86.9824	NA	NA	NA	NA	1.23498	NA	4.46047	1.05405	1.17064	0.00880031	3.81642	NA	1.00803	178.646	2.69401	0	1.42858	0.00256791	5.11046	20.8078	7.89361	1.79118	0	1.66068	1.65813	4.49202	32.1292	148.752
259	72.75	32.25	226	20.2283	12.721	28.797	26.871	71.4444	481.728	1.35499e+06	0.636112	0.0062406	0.642352	0.0461928	0.0250232	0	0	0.00810372	0.0946688	0.597833	73.9214	NA	NA	NA	NA	2.07828	NA	13.3359	2.47893	1.69718	0.00884616	3.63532	NA	2.701	196.975	2.66069	0	1.64376	0.00101691	5.83453	20.5877	42.2445	1.74654	0	2.54188	1.84763	7.71709	32.3244	158.278
260	72.75	32.75	243	18.6255	11.0764	26.8195	38.129	0	0	538989	0.101373	0.464501	0.565874	0.041712	0.00366268	0	0	NA	0.23043	2.19106	59.9408	NA	NA	NA	NA	6.44291	NA	11.1531	7.43337	3.83262	NA	3.60345	NA	5.71104	470.937	2.6475	0	4.94804	0.00614234	16.4787	18.4239	134.007	1.85973	0	5.94048	4.08682	18.535	29.7108	189.883
261	72.75	33.25	241	18.5508	10.6758	26.8642	66.8387	10.8389	110.133	490269	0.154492	0.423038	0.577531	0.0318241	0	0	0	NA	0.149598	2.10415	46.2166	0.00878442	NA	NA	NA	7.04893	0.0190531	16.5702	10.1866	6.42527	NA	3.31884	NA	8.50435	463.322	2.74253	0	4.01401	0.00605955	13.5203	16.8569	80.7162	1.80159	0	4.09636	3.3451	12.518	27.3228	266.514
262	72.75	33.75	235	17.5544	9.6866	25.7705	79.6452	0	0	1.2403e+06	0.215326	0.383521	0.598848	0.0318594	0.0187275	0	0	NA	0.47256	1.09133	58.3365	0.142671	0.101796	0.0693847	0.0846053	5.98942	0.477045	10.0418	7.35296	5.52805	NA	5.89459	0.258112	4.88934	528.131	2.89524	0	7.49902	0.0121318	24.4759	16.9235	162.251	1.79494	0	8.36241	5.68782	26.4783	26.2654	300.557
263	72.75	34.25	247	15.2592	8.06798	22.9105	113.677	97.4833	681.883	931140	0.146598	0.310851	0.457449	0.0174718	0.012911	0	0	0.00806956	1.63849	3.45795	51.9186	0.407709	0.484522	0.240504	0.252871	6.55053	1.84417	4.25744	9.12054	4.68741	NA	10.1982	1.7941	3.68437	862.279	2.78439	1.78888e-05	19.3416	0.00820541	62.9119	15.6792	362.06	1.74759	0.00339411	14.3323	10.2663	46.6037	25.4419	334.185
264	72.75	34.75	216	11.8365	5.4386	18.6875	125.194	80.9389	608.672	684010	0.0309365	0.279143	0.31008	0.00457102	7.45923e-13	0	0	0.0883986	5.02478	4.18298	26.6223	1.47114	1.452	0.483558	0.955983	10.3552	6.79915	7.04515	10.5338	7.23493	NA	10.2203	0.413649	7.61859	1676.06	2.72023	9.03722e-05	32.2614	-0.00204819	105.472	12.1512	608.698	1.74083	0.00886661	14.9072	13.5579	49.3646	18.7132	428.284
265	72.75	35.25	176	3.94215	-1.10514	9.35776	119.323	0	0	259691	0.0278837	0.0969043	0.124788	0.0420777	0	0	0	7.6213	4.48068	3.5512	9.1516	2.76965	2.28205	1.41425	2.50968	22.2163	4.64449	6.542	8.30511	9.99941	5.14807	4.18069	0.133256	7.94185	2953.37	2.63331	0.00446103	43.1532	0.0324352	141.157	11.0527	818.417	1.7931	0.0608077	17.6088	17.3494	57.6098	17.0452	1004.99
266	72.75	35.75	136	-0.91522	-5.76379	4.17495	62.1935	0	0	59059.9	0.00516989	0.0179465	0.0231164	0.0924113	0	0	0	18.5348	1.01534	6.49429	6.82429	0.765538	0.571833	0.363997	0.581344	27.4618	0.890721	1.55017	10.7298	3.76485	13.3717	4.8752	0.0535003	2.69435	4065.69	2.64871	0.00496099	41.1641	0.0554453	135.045	11.2362	628.222	1.80724	0.0699146	20.2642	17.6483	65.1459	17.6798	2111.03
267	72.75	36.25	115	-1.981	-7.12713	2.91593	31.1935	0	0	37506.8	0.00331394	0.00834098	0.0116549	0.179012	0	0	0	41.4588	0.279222	5.66799	5.64044	0.297249	0.264167	0.252343	0.140388	13.9545	0.229938	0.509055	9.72208	1.61025	14.0316	5.14571	0.131972	1.20777	4013.8	2.73141	0.00482378	40.2027	0.041179	132.42	11.2782	727.568	1.81348	0.0692444	19.3412	15.4241	63.0149	16.9893	2185.36
268	72.75	36.75	100	-3.24591	-8.58695	1.47781	21.6774	0.05	6.87222	20217.8	0.00243939	0.00850901	0.0109484	0.206083	0	0	0	33.2785	0.0908343	1.88875	1.86993	0.146502	0.126597	0.103762	0.241692	3.19905	0.114403	0.193544	2.81888	0.482661	12.4551	1.69177	0.120878	0.312146	4328.36	2.68517	0.00809544	41.5334	0.0542348	136.56	10.9096	693.516	1.76707	0.0888676	21.6285	15.8925	69.8707	16.8977	2519.33
269	73.25	29.75	202	21.1454	13.438	29.5488	9.22581	0	0	682924	0.586514	0.0880348	0.674549	0.0331237	0.0034725	0	0	0.404014	0.00803028	0.402069	60.8003	NA	NA	NA	NA	1.81224	NA	0.792328	1.81817	1.30501	0.0864676	1.5572	NA	0.439023	156.943	2.66476	0	1.19041	0.00480127	4.42938	21.8855	4.71432	1.8039	0	1.00116	1.33589	2.13539	33.1254	97.816
270	73.25	30.25	210	21.2211	13.6052	29.5821	9.80645	186.55	2758.69	1.21501e+06	0.690183	5.91179e-10	0.690183	0.0462113	0.00906787	0	0	0.498154	0.0101714	0.127772	90.7982	NA	NA	NA	NA	0.793988	NA	0.494567	0.875084	0.568142	0.0775315	1.40875	NA	0.341712	160.038	2.64275	0	1.11016	0.00468621	4.20703	21.5512	4.63372	1.78085	0	0.867257	1.21171	1.69595	32.9392	130.837
271	73.25	30.75	216	21.0567	13.5034	29.3716	10.129	54.6667	614.856	1.68198e+06	0.682164	1.13242e-09	0.682164	0.0459886	0.0213817	0	0	2.26625	0.0394942	0.25049	92.7683	NA	NA	NA	NA	0.705872	NA	0.510044	1.01471	0.508214	0.2079	3.88765	NA	0.681591	171.252	2.64731	0	0.955888	0.00326263	3.81268	21.8121	4.95392	1.7807	0	0.784712	1.06072	1.47093	33.1914	151.803
272	73.25	31.25	222	20.6481	13.2935	29.0046	11.9355	5.81111	59.7056	3.12107e+06	0.602976	0.0166535	0.619629	0.0327437	0.0765648	0	0	NA	0.021523	0.660451	82.953	NA	NA	NA	NA	0.628509	NA	0.29921	0.6992	0.399087	NA	14.497	NA	0.385576	182.29	2.6731	0	1.03135	0.00144355	4.00763	21.6259	4.81266	1.79482	0	0.854037	1.1507	1.6878	33.0268	153.607
273	73.25	31.75	227	20.5194	13.2765	29.0169	17.0323	0	0	1.17074e+06	0.670426	0.00242718	0.672853	0.0377221	0.00329842	0	0	0.00804542	0.155554	0.937114	89.7776	NA	NA	NA	NA	0.719095	NA	0.888269	0.62465	0.553737	0.0160923	6.34649	NA	0.549499	190.229	2.6875	0	1.21506	0.00190736	4.4987	21.1448	5.10443	1.79538	0	0.979063	1.33438	2.07006	32.5118	162.919
274	73.25	32.25	232	20.2743	12.9228	28.8865	30.9032	79.1889	891.089	889953	0.680743	1.75342e-09	0.680743	0.0446671	0	0	0	NA	0.112735	0.580177	92.1987	NA	NA	NA	NA	0.667224	NA	1.44923	0.717869	0.501781	0.0161735	3.57126	NA	0.748515	200.829	2.67994	0	1.51257	0.00350818	5.30092	21.0152	6.22309	1.79143	0	1.14207	1.6291	2.44156	32.5414	171.808
275	73.25	32.75	251	19.2301	11.634	27.668	48.5161	68.35	454.622	655802	0.299832	0.287728	0.58756	0.040989	0.00263667	0	0	NA	0.161834	2.31737	71.7672	0.0167934	0.025067	NA	0.0208232	6.42529	0.0468974	2.8259	6.58189	2.82592	0.0118987	4.39198	NA	3.1765	370.855	2.60192	0	5.207	0.0083002	17.1166	17.6351	114.482	1.77406	0	5.56508	4.24243	17.3553	29.5138	180.657
276	73.25	33.25	271	17.8555	10.0287	26.0277	66.129	0	0	834302	2.65041e-07	0.653129	0.653129	0.0574724	0	0	0	NA	0.193283	1.89755	79.1459	0.0305911	0.155136	0.231263	0.164113	3.18554	0.088199	1.93138	4.74872	1.8772	NA	5.18348	1.23962	2.08012	481.571	2.72496	0	5.00106	0.00218525	16.6628	16.4746	86.0589	1.76203	0	4.28858	3.80791	13.2435	27.15	296.75
277	73.25	33.75	278	15.858	8.35087	23.4648	108	0	0	1.40757e+06	0.0166073	0.370724	0.387332	0.0183366	0.0244443	0	0	NA	3.21857	2.56456	52.1269	0.640847	0.484977	0.124599	0.0548765	5.41739	4.90483	4.18595	8.01867	3.81785	0.00806157	11.1328	0.226355	4.69179	915.071	2.91104	0	15.6101	0.0108774	51.0369	13.8276	353.692	1.72478	0	11.1395	8.39564	36.0699	21.3146	398.334
278	73.25	34.25	264	13.642	6.92424	20.4738	138.032	0	0	1.49647e+06	0.158999	0.244632	0.403631	0.010054	0.0299068	0	0	NA	3.38406	5.18299	35.7231	1.0255	0.839947	0.248352	0.256531	8.01045	6.30034	4.43297	11.5095	4.82908	0.0171862	12.9681	0.0149944	4.87967	1342.13	2.78814	0.000104214	24.3385	0.00621466	79.326	12.4251	463.858	1.76184	0.00410549	13.2655	11.4154	43.3777	19.2104	442.878
279	73.25	34.75	230	6.74664	1.64367	12.106	126.258	0	0	448681	0.0351249	0.170633	0.205758	0.0317294	1.37518e-13	0	0	1.09204	4.59844	2.92696	15.2653	2.55529	2.78911	1.04614	1.5569	20.3752	6.92918	5.82737	10.3774	9.41209	1.00145	7.22468	0.0324312	7.5606	2418.5	2.7595	0.000437914	36.1454	0.00881504	118.447	11.7223	807.52	1.76797	0.0173383	14.3583	14.1916	47.5193	17.265	586.31
280	73.25	35.25	175	4.02178	-1.07225	9.45857	66.5484	53.5611	506.556	199546	0.032984	0.0894691	0.122453	0.0437342	0	0	0	1.72001	6.43994	1.80648	4.29954	3.70877	3.18132	1.75794	2.06273	24.4595	5.0511	13.2303	5.4817	11.9214	1.74586	2.07617	0.372574	11.214	2794.32	2.67079	0.00648382	48.352	0.0220358	157.845	11.2823	957.338	1.81092	0.0733166	17.1543	19.3022	56.2357	17.0059	684.816
281	73.25	35.75	141	0.387262	-4.6569	5.63914	19.3548	0	0	54667.6	0.0166913	0.0345472	0.0512385	0.124001	0.000242327	0	0	5.77407	1.71474	4.95583	5.21547	1.00389	0.890821	0.504258	0.467463	41.7693	1.095	4.56561	10.4057	6.53217	6.09985	3.78538	0.135344	5.63045	3807.02	2.56742	0.00560885	41.6691	0.0420856	136.637	10.9853	684.508	1.78665	0.0707843	18.9539	17.5786	61.1858	17.1912	1656.67
282	73.25	36.25	109	-2.77217	-7.97694	2.17656	16.3548	0.0111111	3.60556	42456.6	0.00376148	0.00970325	0.0134647	0.183919	0.000128955	0	0	28.4459	0.462072	5.31298	5.10754	0.240282	0.33408	0.332802	0.100071	23.1824	0.30271	1.60734	10.4439	3.43351	13.2192	4.85016	0.118983	3.05428	3982.99	2.5776	0.00446807	41.2035	0.0333283	135.645	10.9745	739.464	1.81118	0.0641497	18.4673	14.9743	60.4056	17.1125	2058.71
283	73.25	36.75	94	-3.36852	-8.80308	1.4513	15.8387	0	3.38333	21337.2	0.0014584	0.00601684	0.00747524	0.210512	0	0	0	31.0053	0.163366	2.04126	1.84653	0.145097	0.175022	0.190897	0.434019	4.94669	0.156287	0.400109	3.10741	0.755375	16.2618	1.94052	0.175686	0.656315	4348.67	2.68892	0.00518993	38.5477	-0.00312863	127.061	11.4294	704.19	1.83378	0.0692841	20.7619	13.6994	67.8172	17.6682	2556.21
284	73.75	30.25	216	21.324	13.891	29.6008	9.32258	186.406	2719.97	748553	0.632929	0.0383798	0.671308	0.0363525	0.00317189	0	0	3.9288	0.0322	0.335458	61.5107	NA	NA	NA	NA	1.29021	NA	0.800696	1.61463	0.877016	0.376135	1.2582	NA	0.626213	170.362	2.6576	0	1.33177	0.00478137	4.76591	21.1849	4.42858	1.79558	0	0.961207	1.41829	1.93701	32.4787	144.542
285	73.75	30.75	222	21.2052	13.871	29.4248	11.5161	1.01111	20.0333	1.31101e+06	0.695118	8.77011e-07	0.695119	0.0473813	0.00300027	0	0	0.807793	0.0350018	0.318376	88.7254	NA	NA	NA	NA	0.60357	NA	0.494945	1.09436	0.412219	0.104998	3.19621	NA	0.480606	179.459	2.65326	0	1.32491	0.00277516	4.76703	20.8574	6.34825	1.78342	0	0.95047	1.40393	1.89374	32.2534	156.818
286	73.75	31.25	225	20.7037	13.5813	28.9739	17.6129	54.1389	594.122	1.35405e+06	0.685544	0	0.685544	0.0454628	0.0104703	0	0	NA	0.0354246	0.214914	93.2036	NA	NA	NA	NA	0.825055	NA	0.335249	0.85499	0.324986	NA	3.86047	NA	0.486752	191.371	2.67301	0	1.17066	0.00166749	4.39722	21.4145	5.40161	1.79409	0	0.960799	1.30074	1.97443	32.8359	162.89
287	73.75	31.75	227	20.5221	13.4819	28.9252	22.3548	4.36111	39.5167	1.45279e+06	0.689829	0.00232028	0.69215	0.0454673	0.0114485	0	0	NA	0.0427731	0.126557	96.1947	NA	NA	NA	NA	0.245825	NA	0.106217	0.229963	0.347825	NA	3.39098	NA	0.137959	202.126	2.68064	0	1.1461	0.00190167	4.3118	21.3123	4.77046	1.79531	0	0.970744	1.29271	2.02265	32.6904	173.596
288	73.75	32.25	239	20.1472	13.0029	28.6881	41.4516	75.4778	852.2	1.1054e+06	0.675347	1.69471e-09	0.675347	0.0452984	0.00516582	0	0	NA	0.0220914	0.20981	92.8061	NA	0.00805439	NA	0.00804997	1.04563	NA	0.967558	0.703317	0.615435	0.0161066	3.78442	NA	0.485238	211.643	2.69169	0	1.53264	0.00353065	5.37477	20.9048	5.95235	1.79292	0	1.17477	1.66434	2.51793	32.3592	175.857
289	73.75	32.75	271	19.5315	11.9691	27.9552	50.6452	63.6111	416.15	1.4454e+06	0.469605	0.17861	0.648215	0.0383954	0.0191698	0	0	NA	0.0888393	1.97428	80.588	0.0228296	0.0334903	0.0450461	0.027142	3.3959	0.0448189	0.949764	4.26375	1.05433	0.00976541	5.79214	0.112861	1.31759	267.097	2.67247	0	3.51798	0.00563516	11.6005	18.6029	59.9417	1.73404	0	4.17231	3.40866	12.6951	30.1326	189.843
290	73.75	33.25	297	17.5004	9.78229	25.3779	63.4516	58.9167	379.756	697568	0.0793637	0.497091	0.576455	0.0303267	0.00287183	0	0	NA	1.25329	1.01539	67.2552	0.167908	0.2016	0.305409	0.217033	4.4983	0.515266	2.23639	6.77152	2.29415	NA	4.55832	1.7973	2.8584	539.467	2.64545	1.51984e-05	10.6595	0.0139572	34.6546	15.7628	162.84	1.70724	0.00156827	8.50353	6.99806	27.2534	26.1255	231.113
291	73.75	33.75	279	13.4039	6.71247	19.9207	112.903	42.2444	273.044	999635	0.00857266	0.300606	0.309179	0.00360092	0.0159755	0	0	NA	5.46498	1.60136	29.6556	0.701066	0.593359	0.165709	0.132984	9.28363	6.61025	7.18592	9.32308	6.78575	NA	6.53003	NA	9.03225	1330.17	2.63396	5.07716e-05	24.3151	0.0143101	79.6458	11.6733	447.313	1.73627	0.00313867	10.5571	10.5069	34.8827	18.2686	399.443
292	73.75	34.25	255	8.80339	3.51745	13.8005	135.903	35.1056	227.017	469523	0.0304976	0.158115	0.188612	0.00418212	0.00161011	0	0	0.0802614	5.76308	0.697145	12.551	2.50153	2.85189	1.02008	1.49128	10.8489	11.0284	7.05432	8.74122	7.44694	0.112368	2.81298	0.0401367	8.05302	1930.2	2.67312	0.000513811	37.1484	-0.00529935	120.728	11.2709	634.186	1.78278	0.0207699	13.0469	14.7204	43.4822	17.1788	617.199
293	73.75	34.75	210	2.92419	-2.01472	8.01684	105.839	7.88889	53.6944	168788	0.0019277	0.101181	0.103109	0.0598793	0	0	0	3.14442	2.94923	1.92063	7.37282	2.17027	2.4176	1.01519	1.25691	33.8052	5.06371	3.81643	8.23705	9.04235	2.61006	3.75505	0.14104	5.54583	3259.36	2.68445	0.00159746	39.8399	0.0274582	130.541	11.0271	732.587	1.76758	0.0391086	15.548	14.9604	51.0567	16.7273	1073.66
294	73.75	35.25	159	1.36244	-3.6394	6.65604	36.129	51.5389	496.683	74141.8	0.00865484	0.0512809	0.0599357	0.102602	0	0	0	1.32442	2.34953	1.29021	2.71458	1.07149	0.921605	0.425313	0.53489	41.7215	1.45311	11.5834	3.69214	14.9535	1.24827	1.57095	0.0508986	13.0265	3199.32	2.64803	0.00170947	40.3442	0.0216659	132.105	11.5344	959.463	1.84712	0.0405432	15.502	15.829	50.7716	17.7411	958.103
295	73.75	35.75	130	0.628961	-4.57598	5.97588	18.4839	0	0	46371.4	0.0191157	0.0464599	0.0655756	0.120378	2.65429e-05	0	0	0.673342	1.30536	2.03053	2.38914	0.354744	0.413505	0.168334	0.223949	49.4753	0.464477	9.22208	6.13051	13.1542	1.3606	1.93504	0.0248776	11.2357	3548.5	2.59049	0.00140083	36.6872	0.0455563	120.422	11.2788	823.017	1.78035	0.0328829	16.0183	14.757	52.3149	17.2563	1265
296	73.75	36.25	108	-0.796825	-6.29187	4.35014	14.3226	0.155556	5.85	56832.4	0.00636682	0.0148612	0.021228	0.174073	0.00046455	0	0	17.9637	0.683215	4.15375	4.14772	0.324916	0.276303	0.483162	0.265913	30.1771	0.355365	4.85056	8.64871	6.98838	10.7291	3.82108	0.286745	6.43686	3717.39	2.60909	0.00245647	40.4603	0.0297774	133.022	11.1492	839.459	1.79992	0.0414604	17.8893	14.2028	58.8097	17.0526	1670.05
297	73.75	36.75	96	-5.45537	-10.8801	-0.5371	14.1613	0	0	19695.4	0.000777341	0.00237604	0.00315339	0.170582	0	0	0	26.4613	0.183198	2.00921	1.84728	0.153905	0.109335	0.192175	0.398405	6.76081	0.151847	0.938822	3.09523	1.33136	21.67	1.74263	0.237644	1.26406	4382.23	2.70383	0.00477333	35.9323	0.0255548	117.97	11.9153	652.28	1.81816	0.0532114	21.0394	13.3427	68.3072	18.3181	2456.38
298	74.25	30.75	228	20.978	13.7794	29.18	16.2258	189.494	2691.91	944082	0.726192	1.96041e-09	0.726192	0.0323003	0	0	0	NA	0.0612135	0.35343	48.8923	NA	NA	NA	NA	0.833468	NA	1.60697	1.54412	0.901116	NA	1.52912	NA	1.13539	187.725	2.65896	0	1.45551	0.00197848	5.11336	20.6094	4.95348	1.78386	0	1.09249	1.56546	2.34312	32.1264	161.077
299	74.25	31.25	229	20.5329	13.5603	28.68	24.0968	0	0	3.15018e+06	0.602526	0.0130852	0.615611	0.035792	0.0665205	0	0	NA	0.0673559	1.72787	67.8085	NA	NA	NA	NA	0.803674	NA	0.66272	1.06294	0.434568	NA	16.5358	NA	0.633731	201.913	2.67522	0	1.97676	0.000563879	6.5735	20.3025	5.603	1.79927	0	1.447	2.10782	3.16323	31.8068	157.834
300	74.25	31.75	235	20.1817	13.2575	28.3498	28.3871	52.7167	559.611	4.5612e+06	0.599468	1.47868e-09	0.599468	0.0361006	0.120773	0	0	NA	0.148406	1.12951	82.8907	NA	NA	NA	NA	0.769407	NA	0.263827	0.696395	0.405199	NA	8.96767	NA	0.336898	211.735	2.67318	0	1.45136	0.002293	5.13087	20.8994	5.47964	1.79003	0	1.1439	1.59339	2.43698	32.4306	178.077
301	74.25	32.25	254	19.5761	12.4813	27.7883	44.5484	0	0	3.00572e+06	0.639979	0.0158805	0.65586	0.0422653	0.0767213	0	0	NA	0.166968	0.480346	88.5615	NA	NA	0.00803999	NA	0.858127	NA	0.166311	0.451727	0.363506	NA	7.69833	NA	0.244681	226.08	2.70208	0	1.17428	0.00380793	4.37996	21.3072	6.72262	1.78365	0	0.970913	1.31123	2.02939	32.6851	195.298
302	74.25	32.75	292	18.6427	11.2151	26.6717	49.4839	68.2	790.817	1.40446e+06	0.392516	0.269743	0.662259	0.0356692	0.02154	0	0	0.00806632	0.257082	0.545324	76.2981	0.00803246	NA	0.00808295	NA	1.07887	0.171001	0.469285	1.94076	0.489559	NA	3.24748	NA	0.644741	305.85	2.72414	0	3.84223	0.00541573	12.8324	17.7655	94.3128	1.66676	0	5.21219	3.63279	16.1612	28.4093	212.068
303	74.25	35.25	151	0.666096	-4.46881	6.06891	34.3548	49.7611	489.9	74054.2	0.00882574	0.0410031	0.0498289	0.118792	0.000769968	0	0	1.86466	1.25477	1.93525	3.18547	0.445873	0.463653	0.158981	0.204328	36.7254	0.86446	11.2396	3.55672	15.1495	3.13677	1.99032	0.0301663	12.8132	3197.02	2.68733	0.00196632	38.5169	0.00430537	126.353	11.6306	962.939	1.8272	0.0381142	15.8245	14.8424	52.0991	17.6352	1090.67
304	74.25	35.75	126	0.468467	-4.90212	5.89932	18.0323	1.3	18.2222	70673.8	0.0148943	0.0434813	0.0583757	0.124328	0.00119741	0	0	1.90347	1.18837	2.76909	3.52497	0.278442	0.488954	0.265366	0.33772	40.2137	0.506196	8.86081	6.52562	14.7845	3.47711	2.68738	0.0421997	12.6897	3367.99	2.64259	0.00523694	38.3117	0.034279	125.769	11.4353	953.588	1.81562	0.06824	18.3571	15.2647	60.017	17.4207	1279.02
305	74.25	36.25	107	-0.747798	-6.38815	4.51739	14.2258	0.0222222	6.52778	50066	0.00917772	0.0225807	0.0317584	0.112845	0.000266695	0	0	17.1216	0.743624	3.86803	3.40127	0.398456	0.519028	0.896706	0.412656	23.8035	0.489332	4.39991	6.1639	7.26734	20.4748	3.30588	0.383468	6.89405	3877.88	2.60282	0.0126144	44.9173	0.0393894	147.154	11.0226	934.191	1.78293	0.106863	21.9552	17.4051	71.1668	16.9252	1568.63
306	74.25	36.75	93	-3.67795	-9.31033	1.44963	15.6129	0	0	18138.2	8.89684e-05	0.000691699	0.000780667	0.0602241	0	0	0	31.1641	0.238131	1.82189	1.34562	0.206008	0.250525	0.347136	0.816752	5.51051	0.167886	0.813604	2.08882	1.32081	22.8066	1.35083	0.458173	1.26893	4502.31	2.57443	0.0194116	44.0282	0.0437166	143.775	11.027	716.911	1.78044	0.136552	25.6574	17.6954	82.3746	17.9278	2535.03
307	74.75	32.25	280	18.4446	11.3519	26.3132	46.2258	0	0	1.75132e+06	0.682175	0.0141425	0.696317	0.0480927	0.0143844	0	0	NA	0.0311711	0.174679	72.6069	NA	NA	NA	NA	0.149118	NA	0.11087	0.167947	0.0878058	NA	2.7294	NA	0.0338455	243.086	2.74334	0	1.27485	0.000989714	4.65909	20.4146	11.7024	1.75343	0	0.982607	1.37825	2.03192	31.5959	208.171
308	74.75	34.75	173	1.13898	-4.18011	6.52287	124.677	0	0	56013.9	0	0.105597	0.105597	0.071176	0	0	0	2.5028	1.01275	2.66872	7.64705	0.789034	0.967305	0.352672	0.71165	30.1843	1.4915	1.74408	8.15423	6.069	4.26106	5.18329	0.0155316	2.75585	3825.06	2.70288	0.00147505	36.4174	0.0134249	120.296	11.0525	577.068	1.76187	0.0357538	15.8441	13.5494	52.1565	17.2115	2143.18
309	74.75	35.25	130	-2.65536	-7.97083	2.75894	60.0968	0	0	63518.9	0.00550742	0.0403016	0.045809	0.105173	0.000758495	0	0	3.17083	0.820589	3.73177	5.82508	0.426512	0.384964	0.163951	0.20456	42.189	0.672727	2.55563	6.44618	9.6093	9.87219	4.24972	0.10193	5.81066	3805.05	2.68882	0.00605522	40.3098	0.0272205	132.802	11.3355	953.087	1.84147	0.0749371	19.11	15.3752	62.2161	17.669	1385.09
310	74.75	35.75	111	-1.41621	-6.96055	4.02556	22.9032	49.0389	484.478	55564.8	0.00901965	0.0376714	0.0466911	0.120642	0.000587852	0	0	7.80717	1.07712	3.81679	4.05102	0.428825	0.486	0.221557	0.11044	27.4787	0.508402	5.33275	4.97941	12.1948	19.013	3.03035	0.178735	9.82842	3606.89	2.71854	0.0108091	44.4641	0.0339141	145.949	11.198	1095.47	1.78918	0.102893	21.6235	17.3205	70.3763	16.6534	1269.31
311	74.75	36.25	100	-2.86718	-8.58186	2.46807	16.6129	0	3.34444	56753.9	0.0124302	0.0122853	0.0247155	0.0911675	0.00124427	0	0	29.5467	0.565099	3.7533	3.33368	0.397095	0.604973	0.892556	0.31276	12.2264	0.493408	2.60839	4.91622	4.23595	28.9993	3.06566	0.742862	3.84925	4118.44	2.58412	0.02634	47.9144	0.0225197	156.731	11.2524	1076.63	1.83015	0.157935	26.4368	19.1414	85.4403	17.8625	1805.8
312	74.75	36.75	87	-6.76901	-12.4489	-1.52326	15.1935	0	1.39444	33204.8	0	0.000624225	0.000624225	0.0865172	0	0	0	50.4263	0.236928	1.96922	1.76387	0.275286	0.294773	0.401741	0.563813	3.56345	0.279415	0.537596	2.34835	0.603342	21.5142	1.8298	0.353889	0.631028	4507.07	2.57881	0.0163153	44.6407	0.0394687	145.985	11.3015	744.576	1.8025	0.122372	23.2829	17.9017	74.8566	18.124	2587.97
313	75.25	32.25	312	17.7814	10.6046	25.2919	50.7419	37.2167	415.606	1.27506e+06	0.554471	0.17062	0.725091	0.0402187	0.00356134	0	0	NA	0.0161194	0.0160785	37.6884	NA	NA	NA	NA	0.211399	NA	0.0806116	0.491219	0.0725436	NA	0.220813	NA	0.0966268	258.734	2.74721	0	1.35841	-0.000315399	4.91577	19.1832	14.192	1.71591	0	0.978546	1.40481	2.11423	30.2892	220.189
314	75.25	34.75	137	-1.83201	-7.38716	3.70796	122.452	0	0	29623.7	0.000437317	0.061734	0.0621713	0.134508	0	0	0	1.48314	0.170548	2.37498	8.44144	0.0697396	0.0536465	0.0241745	0.0322208	37.4984	0.17365	1.12291	8.59984	6.36055	1.87692	6.70443	0.00917344	2.35318	4139.38	2.53211	0.000168605	28.746	0.0271433	94.8603	11.8891	359.947	1.83016	0.0110449	15.3324	11.3987	50.4869	18.9498	2813.88
315	75.25	35.25	109	-1.43812	-7.11644	4.14029	47.8065	0	0	40436.3	0.00281413	0.0166484	0.0194625	0.125946	0.000242783	0	0	5.30843	0.272174	6.12791	9.59228	0.157601	0.193471	0.090262	0.0476612	39.8701	0.316006	1.10352	8.69351	5.16176	12.7902	6.86921	0.114403	2.64455	4056.48	2.62148	0.00655957	36.2182	0.0471072	118.77	11.7662	671.511	1.83384	0.0745628	20.2004	15.8708	64.8372	18.7704	2015.3
316	75.25	35.75	95	-3.66491	-9.43966	1.81679	31	44.9333	450.461	46128.3	0.00467383	0.0285248	0.0331987	0.11157	0	0	0	13.564	0.273635	6.63561	5.82482	0.284966	0.405661	0.17477	0.135922	18.7048	0.301449	0.808984	6.72615	3.64756	36.0254	4.69532	0.170798	2.14681	4276.84	2.58122	0.0137927	42.0307	0.0524649	137.854	10.9324	842.328	1.7748	0.11549	24.283	17.9653	78.1652	17.8247	1797.48
317	75.25	36.25	80	-7.62438	-13.4443	-2.19459	19.0323	0	0	11664.6	0	0.00101281	0.00101281	0.0223868	0	0	0	37.5362	0.222975	3.20679	2.08893	0.254359	0.393263	0.513678	0.194133	3.697	0.319108	0.422287	2.53951	1.02566	44.8549	2.06108	0.416853	0.720888	4722.24	2.6844	0.0216433	45.0432	0.0505885	147.625	11.3891	850.209	1.78656	0.143995	26.2959	19.3361	84.7835	17.1146	2423.19
318	75.25	36.75	77	-8.05347	-13.8603	-2.58051	12.3226	0	0	12439.2	0	1.12968e-05	1.12968e-05	0.032946	0	0	0	40.7767	0.168664	1.16531	1.05999	0.150421	0.158488	0.210925	0.342806	0.965664	0.196622	0.230999	1.03368	0.258673	27.5462	0.967823	0.30971	0.224974	4832.78	2.5949	0.00736418	42.6035	0.0383551	139.657	11.5037	606.369	1.83115	0.0763149	20.204	16.8459	65.5904	18.1553	2972.48
319	75.75	34.75	104	-4.21137	-10.0738	1.46469	51.3226	1.97222	30.6222	12576.2	0.000626305	0.00622698	0.00685329	0.133953	0	0	0	12.8713	0.0794561	6.83153	9.50742	0.0312392	0.0156187	0.0231741	NA	23.2195	0.0171687	0.080465	7.48971	1.35872	6.70147	14.1322	0.0242101	0.339317	4304.47	2.62921	0.000581619	31.4002	0.0478744	100.143	11.8365	489.018	1.82851	0.023819	16.2204	12.6295	52.8288	18.3194	2818.62
320	75.75	35.25	94	-0.954384	-7.01715	4.75252	24.9355	43.7389	444.683	121564	0.0129846	0.0156301	0.0286147	0.158943	0.0034451	0	0	31.9208	0.314321	9.74573	9.61212	0.161274	0.104764	0.0984555	0.077976	14.8844	0.323254	0.575272	7.08559	2.1051	12.6141	9.43386	0.13915	1.00978	3850.17	2.6069	0.00788436	36.8657	0.0286405	120.965	12.032	833.433	1.81097	0.0832134	21.9592	16.0286	71.0484	19.604	2247.75
321	75.75	35.75	85	-5.91596	-11.944	-0.294362	25.1935	0	0	36292.4	0.00218179	0.00816461	0.0103464	0.0831894	0.000264772	0	0	24.849	0.219078	5.04827	4.20741	0.152328	0.171623	0.146892	0.0842469	4.34228	0.21954	0.348343	2.98338	0.949477	50.6939	3.29223	0.178787	0.541376	4421.18	2.63644	0.01937	39.3242	0.00403884	128.972	11.6508	837.908	1.76773	0.136296	27.6013	18.6127	88.6038	18.5642	2364.19
322	75.75	36.25	64	-5.7828	-11.7795	-0.0594769	20.5484	0	0	8582.77	0	8.94475e-05	8.94475e-05	0.011238	0	0	0	34.3166	0.0616844	1.40534	1.10197	0.0400135	0.0911622	0.0913362	0.0245856	0.5953	0.0745443	0.0730098	0.891234	0.181829	54.1208	0.972403	0.0417821	0.110887	4921.27	2.60732	0.0140425	39.5499	0.0333749	129.662	11.664	641.304	1.82609	0.116524	24.6345	17.6464	79.2277	18.4535	3036.01
323	76.25	34.75	89	-1.20481	-7.39146	4.75033	28.6774	35.5889	361.967	36518	0.00123153	0.0138031	0.0150347	0.193364	0	0	0	25.3835	0.0637971	9.00658	6.75857	0.0165574	0.00803897	0.00805488	0.0155746	7.83083	0.0307986	0.15653	4.58631	0.783055	11.0182	13.128	NA	0.325271	4185.34	2.64477	0.002879	39.15	0.0312815	115.693	11.3297	719.359	1.82142	0.0444534	16.708	15.5006	54.0302	17.5455	2350.97
324	76.25	35.25	76	-2.7229	-9.04983	3.1056	21.9355	6.27778	72.4167	61181.6	0.00725486	0.0138436	0.0210985	0.136545	0.000295614	0	0	41.7938	0.204489	7.50465	5.44691	0.136731	0.0666178	0.0422055	0.0429172	4.23618	0.326835	0.241292	3.231	0.737632	25.7004	6.29761	0.107114	0.400372	4277.64	2.60661	0.0153837	42.4376	-0.0257213	139.048	11.2462	840.249	1.79519	0.109267	23.2047	18.696	74.5636	17.8937	2323.08
325	76.25	35.75	65	-6.75617	-13.0824	-0.988154	22.1935	0	0	7168.52	0	0	0	0.0182185	0	0	0	26.2867	0.0767373	2.04675	1.52183	0.122118	0.036698	0.0469433	0.0432362	0.733027	0.131541	0.10006	0.753392	0.170723	35.9689	1.22809	0.0416259	0.141419	4862.68	2.70987	0.0246204	42.0316	-0.158933	138.13	11.5807	737.476	1.78513	0.152763	28.7088	19.8881	92.3041	17.8179	3063.85
326	76.75	35.25	65	-8.21194	-14.7741	-2.21762	23.1935	0	0	22780.5	0.000770808	0.00359067	0.00436148	0.0609575	6.13712e-06	0	0	33.1913	0.240944	3.00901	1.40463	0.0816391	0.0643816	0.0635675	0.0516564	0.891565	0.230563	0.160566	0.758433	0.216826	46.5522	2.11083	0.143941	0.228569	4796.75	2.68411	0.0369955	44.3201	-0.0519153	145.01	11.4199	794.195	1.77767	0.18069	30.6319	22.6264	97.8439	17.7183	2695
327	77.25	35.25	50	-8.9695	-15.6817	-2.68218	21.6129	0	0	7686.39	0	0	0	0.0100926	9.97418e-05	0	0	15.0125	0.0386687	0.323597	0.124789	NA	NA	0.00805739	0.0161231	0.11646	0.0177152	0.0467259	0.0983122	0.0539654	48.0289	0.177397	NA	0.0310376	5362.68	2.58697	0.0116923	31.9869	0.03407	104.475	11.5092	503.477	1.74575	0.0994326	25.9868	16.0655	82.8382	18.6127	3816.89
[truncated: 13 more columns]
